# Supplementary material for: Differential regulation of non-protein coding RNAs from Prader-Willi Syndrome locus
Source: PubMed Central journal article supplement — Sci Rep. 2014 Sep 23;4:6445. doi: 10.1038/srep06445 (PMC4171697; doi:10.1038/srep06445), 2014-09-23
Supplement: srep06445-s1.pdf [file srep06445-s1.pdf]

**Differential regulation of non-protein coding RNAs from Prader-Willi Syndrome locus**

Chenna R. Galiveti<sup>1,2</sup>, Carsten A. Raabe<sup>1</sup>, Zoltán Konthur<sup>2,3</sup> and Timofey S. Rozhdestvensky<sup>1\*</sup>

<sup>1</sup>Institute of Experimental Pathology, ZMBE, University of Münster, Von-Esmarch-Str. 56, 48149 Münster, Germany. <sup>2</sup>Max Planck Institute for Molecular Genetics, Department of Vertebrate Genomics, Ihnestrasse 63-73, 14195 Berlin, Germany.

<sup>3</sup>Max Planck Institute of Colloids and Interfaces, Department of Biomolecular Systems, Am Mühlenberg 1, 14476 Potsdam, Germany.

\*Corresponding author: Timofey S. Rozhdestvensky. Tel: (49) 251 8358607; Fax: (49) 251 8352134; E-mail: rozhdest@uni-muenster.de

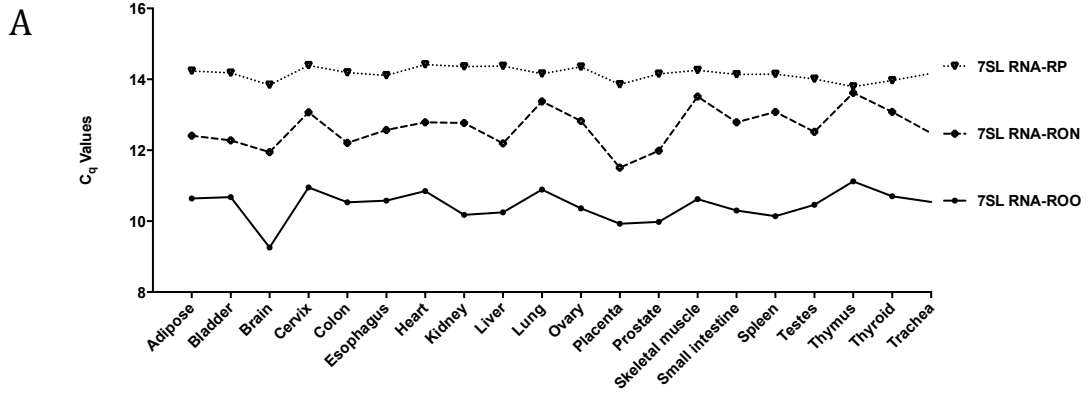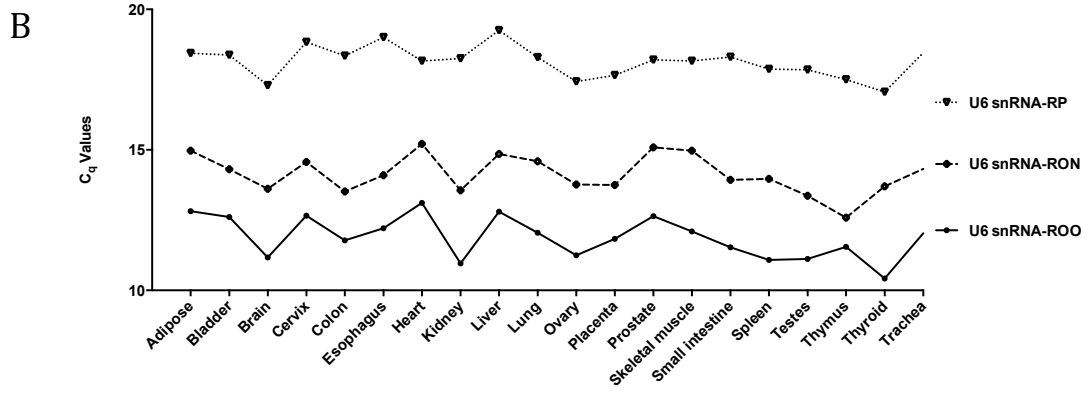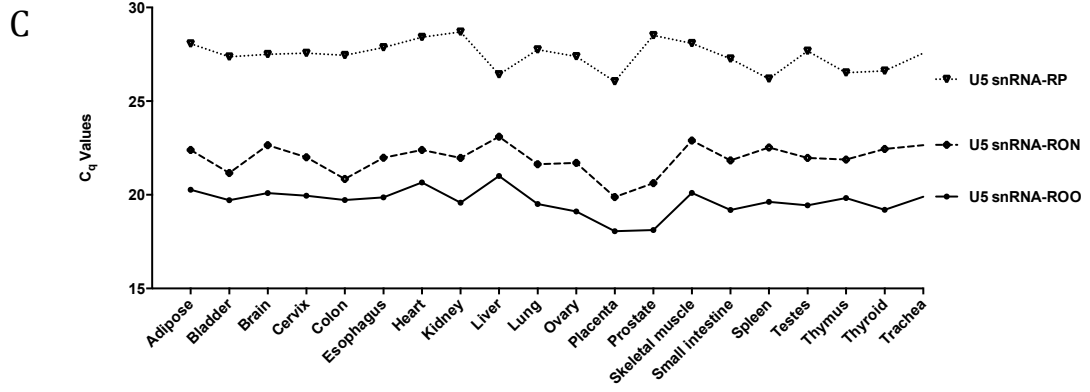

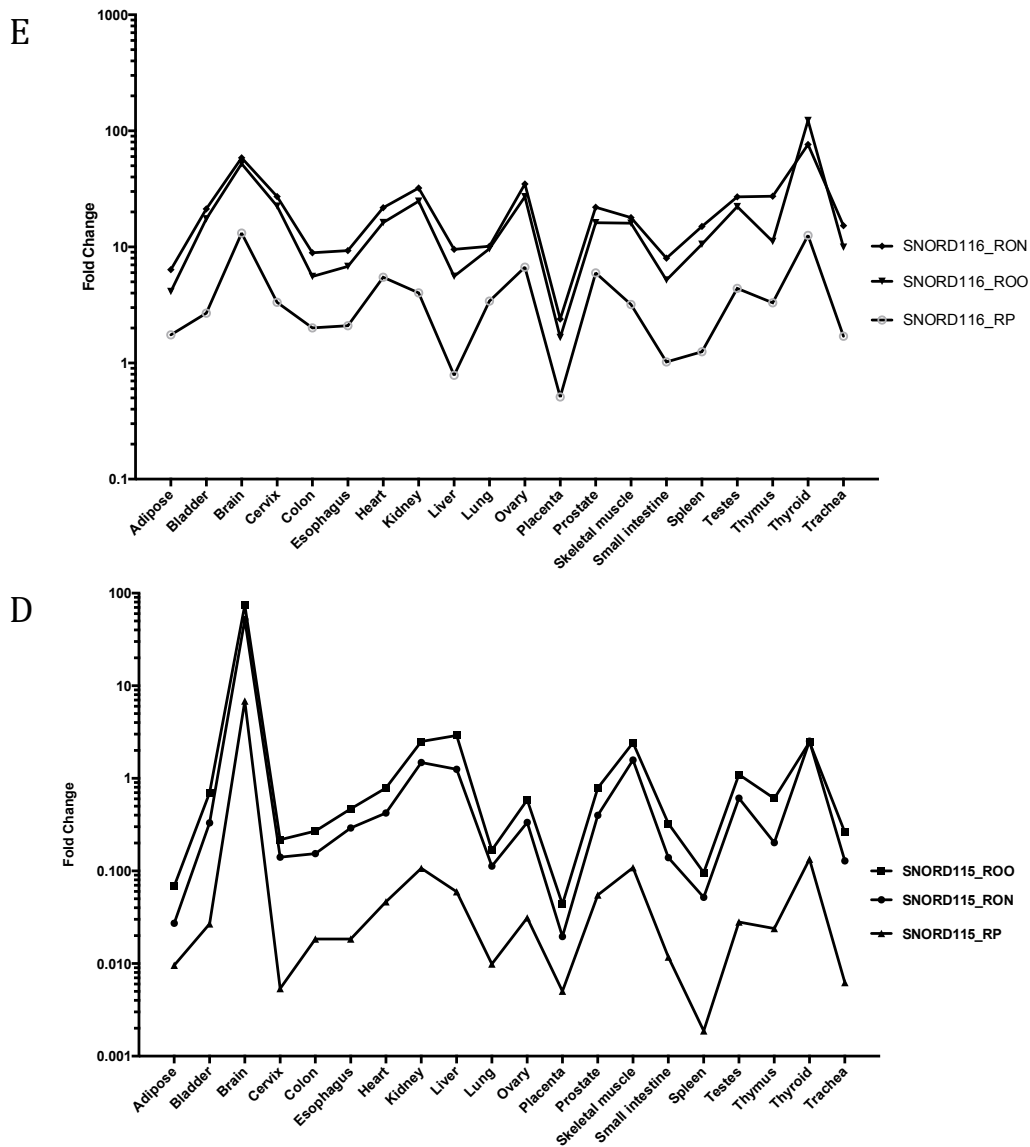

**Figure S1. RT-qPCR analysis of the human PWS locus snoRNAs from different cDNA populations/preparations.** Normalised expression data showing fold change values obtained in 20 different human tissues by qPCR. (A, B, C) Expression profiles of 7SL RNA, U6 snRNA and U5 snRNA, obtained using 3 different cDNA preparation showing highly correlating expression patterns. (D, E) Expression profiles of SNORD115 and SNORD116 from 3 different cDNA preparations showing similar expression patterns. SNORD\_RP indicate for random hexamer primer during cDNA synthesis; SNORD\_ROO and SNORD\_RON represent two different batches of cDNAs prepared with gene specific oligos.

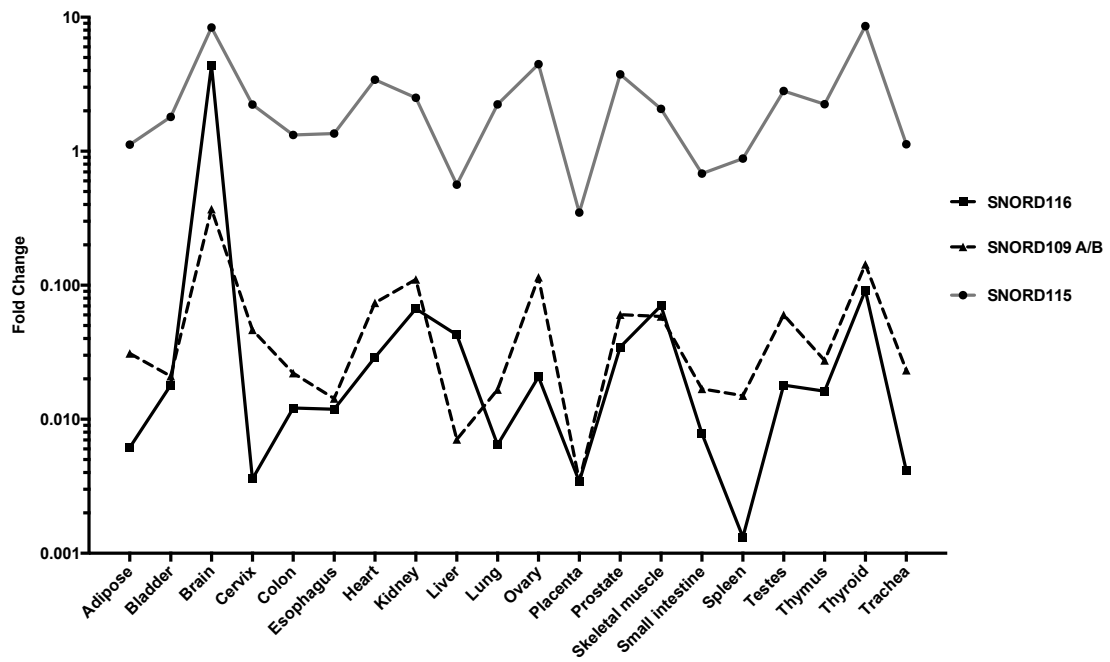

**Figure S2. Comparative expression analysis of SNORD115, SNORD116 and SNORD109A/B RNAs.** RT-qPCR data is represented as fold change after normalization. Merged expression pattern of SNORD109A and SNORD109B do not fully correlate neither with SNORD116 nor with SNORD115 expression.

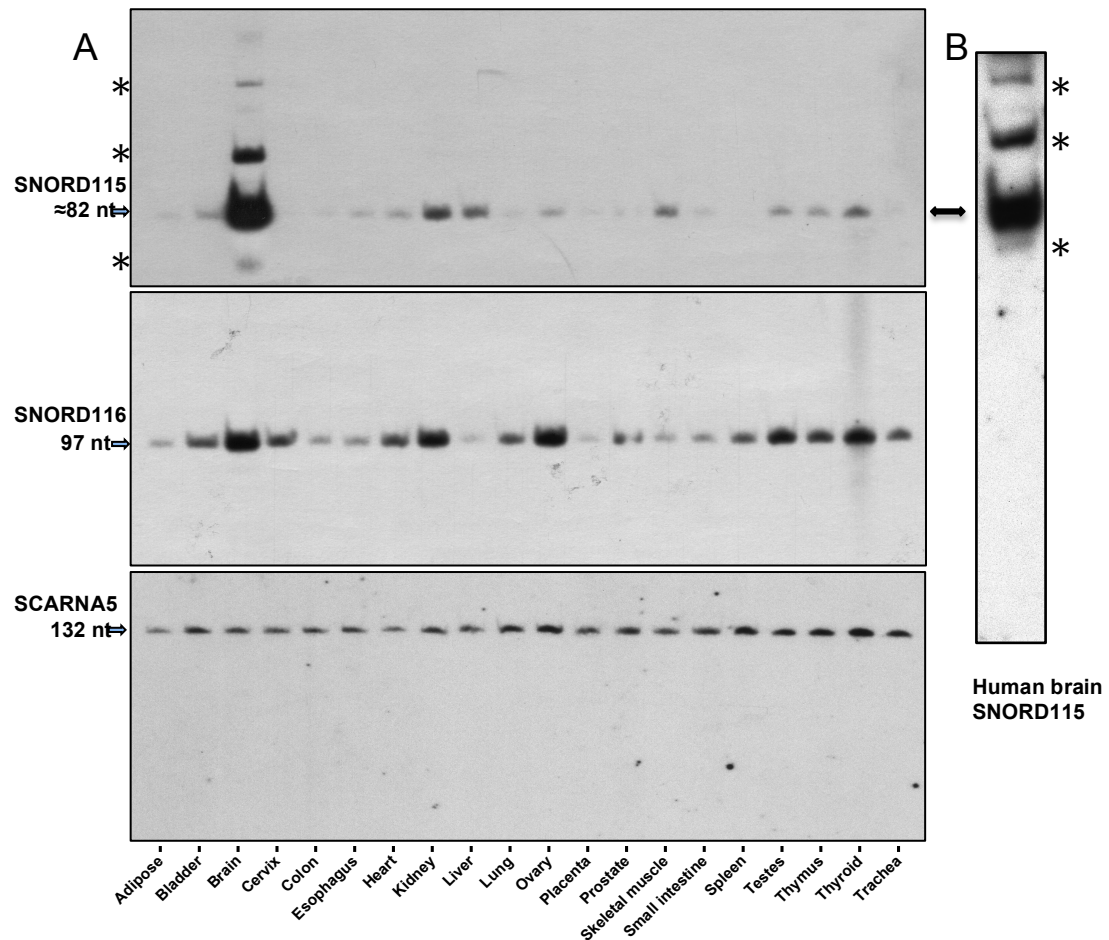

**Figure S3. Northern blot hybridization.** A) Northern blots showing expression of SNORD115 and SNORD116 in 20 different human tissues. SCARNA5 is used as loading control. B) Northern blot analysis of SNORD115 expression in human brain total RNA. Total RNA sample was resolved in 12% PAAG-7M Urea gel to ensure that small size RNAs were retained.

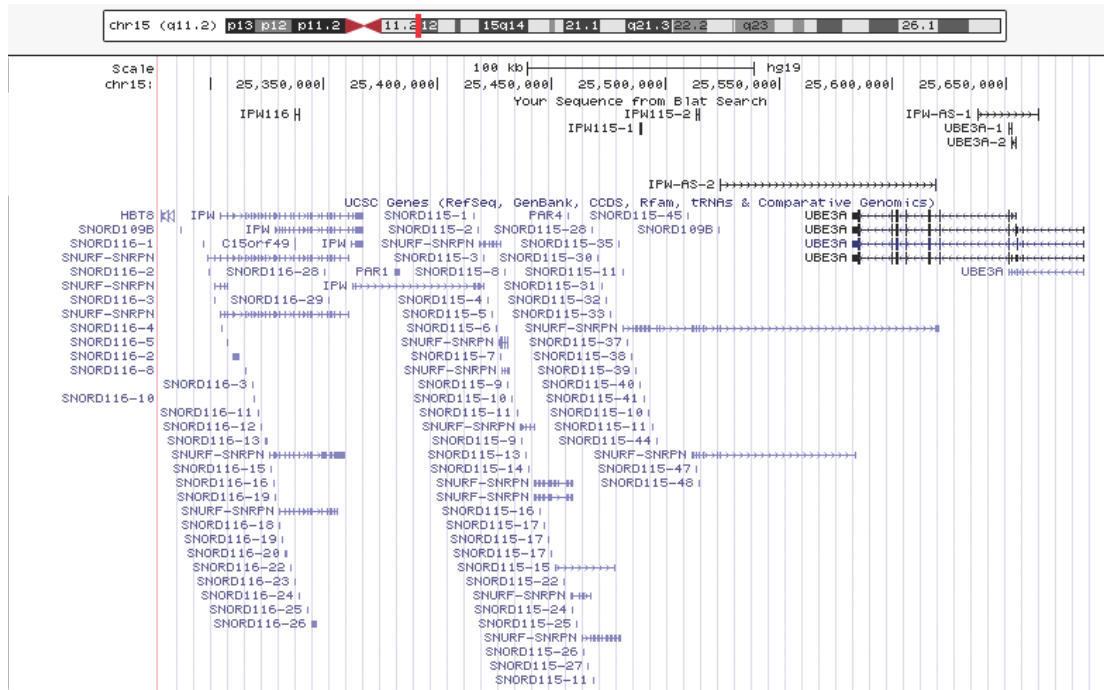

**Figure S4. Genome browser image showing the location of the primers.** The UCSC genome browser image indicates the localization of primers used for detecting IPW-115-2, UBE3A-ATS\_1, UBE3A-ATS\_2, UBE3A-1 and UBE3A-2 transcripts.

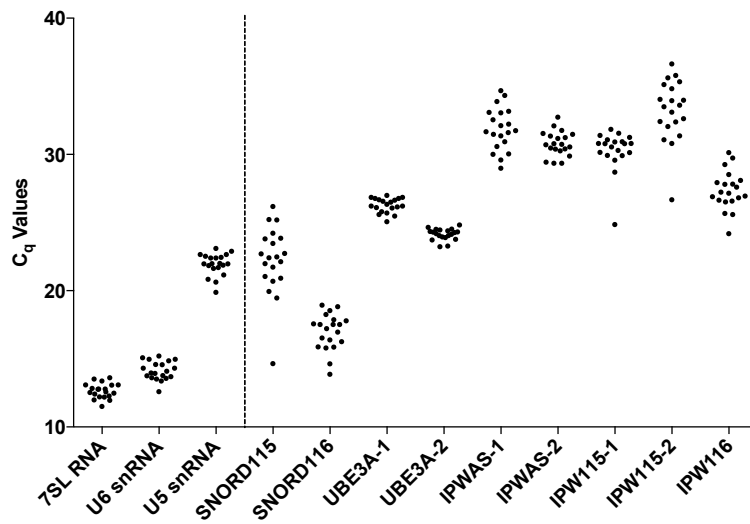

**Figure S5. The “Expression Ruler” applied to other transcripts investigated from PWS-locus. HKR “Expression Ruler” is consisting of 7SL scRNA, U6 snRNA, and U5 snRNA.**

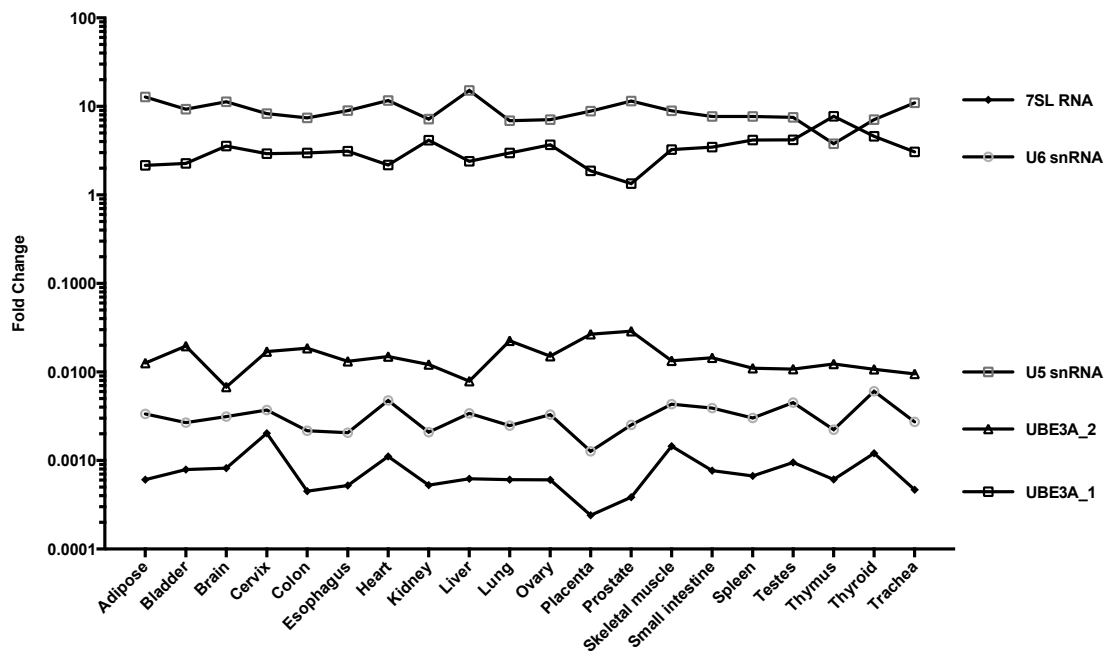

**Figure S6. Comparative analysis of UBE3A expression with expression ruler HKRs.** Comparative analysis of selected HKRs with UBE3A expression 20 different human tissues by RT-qPCR. Expression data is represented as fold change after normalization with the geometric mean of 3 HKRs (7SL scRNA, U6 snRNA and U5 snRNA).



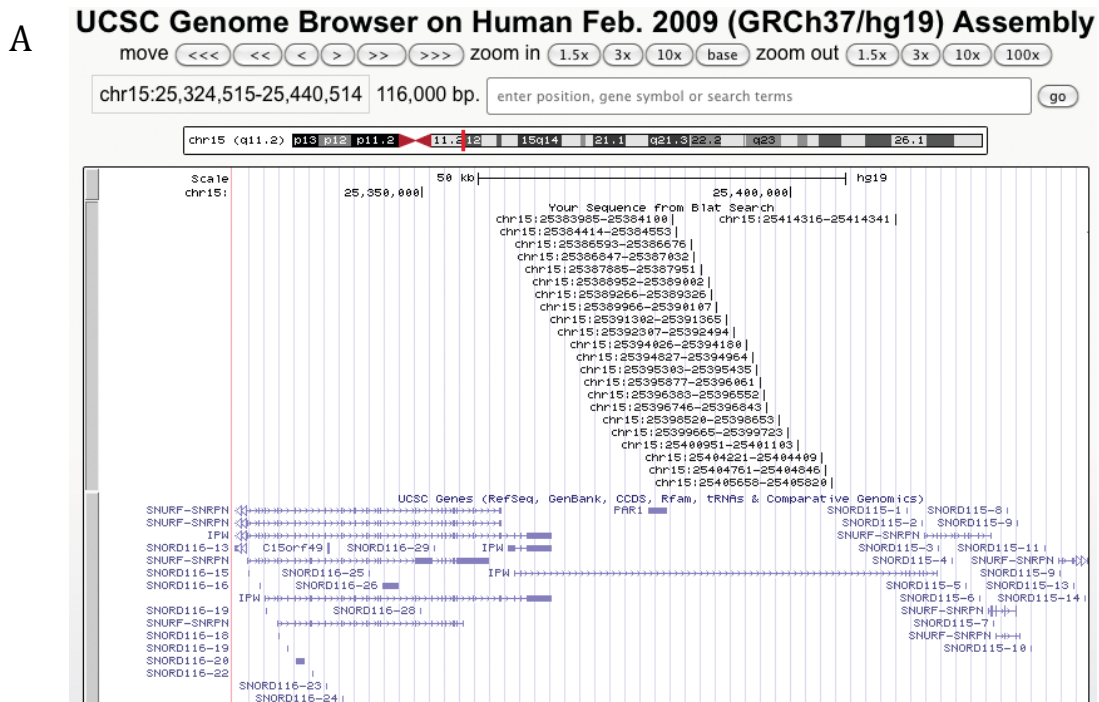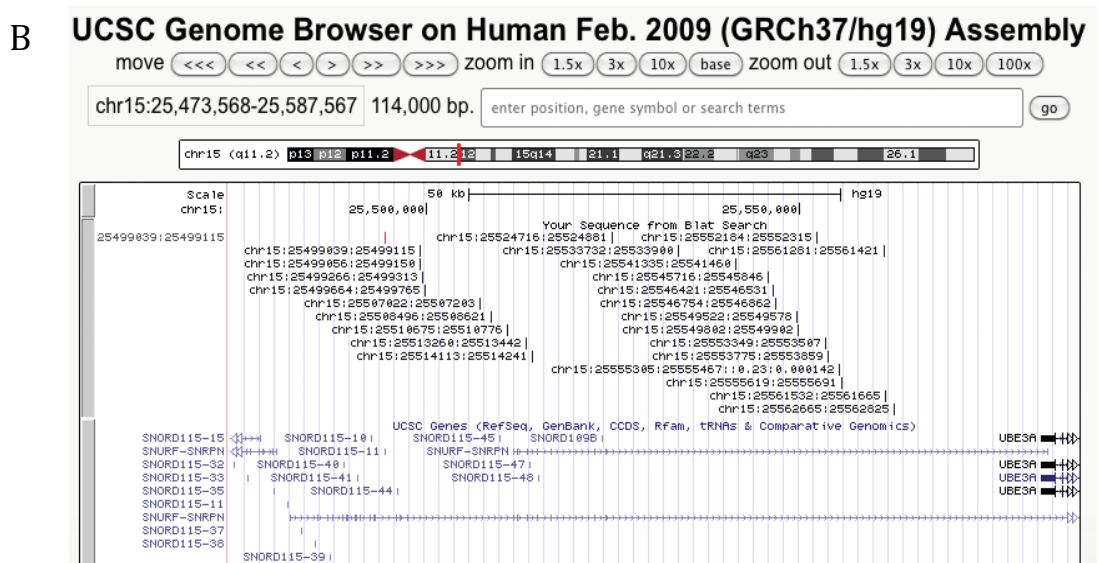

**Figure S7. CAGE tags mapping to investigated PWS genomic region. (A)** An example of UCSC genome browser search results visualizing CAGE-tags between SNORD116 and SNORD115 clusters. **(B)** Examples of CAGE-tags mapping after SNORD115 clusters.

**Table S1: Details of npcRNAs evaluated in this study**

| Used symbol     | Name                             | Accession no. | Primer sequences for qPCR                                                    | amplicon size (bp) |
|-----------------|----------------------------------|---------------|------------------------------------------------------------------------------|--------------------|
| 5.8S rRNA       | Cytoplasmic, ribosomal RNA       | U13369        | Forward: GGTGGATCACTCGGCTCGT<br>Reverse: GCAAGTGCGTTCGAAGTGTC                | 102                |
| 7SK RNA         | RNA, 7SK                         | X05490        | Forward: CCCCTGCTAGAACCTCCAAAC<br>Reverse: CACATGCAGCGCCTCATTT               | 106                |
| 7SL scRNA       | RNA, 7SL, cytoplasmic 1          | X04248        | Forward: ATCGGGTGTCCGCACTAAGTT<br>Reverse: CAGCACGGGAGTTTTGACCT              | 126                |
| U1 snRNA        | RNA, U1A small nuclear           | J00318        | Forward: CCATGATCACGAAGGTGGTTT<br>Reverse: ATGCAGTCGAGTTTCCACAT              | 101                |
| U2 snRNA        | RNA, U2 small nuclear            | X59360        | Forward: CTCGGCCTTTTGCTAAG<br>Reverse: CTCCTGCTCCAAAAATCCA                   | 110                |
| U4 snRNA        | RNA, U4A small nuclear           | X59361        | Forward: GCCAATGAGGTTTATCCGAGG<br>Reverse: TCAAAAATTGCCAATGCCG               | 101                |
| U5 snRNA        | RNA, U5A small nuclear           | X04215        | Forward: TGGTTTCTTTCAGATCGCATAAA<br>Reverse: CCAAGGCAAGGCTCAAAAAT            | 102                |
| U6 snRNA        | RNA, U6 small nuclear            | M14486        | Forward: CTCGCTTCGGCAGCACA<br>Reverse: AACGCTTCACGAATTTGCGT                  | 94                 |
| U12 snRNA       | RNA, U12 small nuclear           | J04119        | Forward: GCCCGAATCCTCACTGCTAA<br>Reverse: TCGCAACTCCCAGGCATC                 | 98                 |
| U87 scaRNA      | small Cajal body-specific RNA 5  | AY077737      | Forward: ATGGGATCATGGAGCAGCTG<br>Reverse: TCACACCCATGACTGCCACT               | 132                |
| U105 snoRNA     | small nucleolar RNA, C/D box 105 | AY349606      | Forward: CCCCTATCTCTCATGATGAACACATAT<br>Reverse: CCCCATCTCTTTCAGAGCG         | 85                 |
| HBII-13 snoRNA  | small nucleolar RNA, C/D box 64  | NR_001294     | Forward: GGATTTGTGATGAGCTGTGTTTACTG<br>Reverse: GGACTTCAGAGTAATCACGTTGAGC    | 67                 |
| HBII-52 snoRNA  | small nucleolar RNA, C/D box 115 | NR_001291.2   | Forward:<br>GTGTTGATGATGAGAACCTTATATTATCC<br>Reverse: GGGCCTCAGCGTAATCCTATTG | 82                 |
| HBII-85 snoRNA  | small nucleolar RNA, C/D box 116 | NR_003316     | Forward: TGGATCGATGATGAGTCC<br>Reverse: TGGACCTCAGTTCGGATGAGA                | 97                 |
| HBII-436 snoRNA | small nucleolar RNA, C/D box 107 | AY055806      | Forward: GGTTTCATGATGACACAGGACCTTG<br>Reverse: GATTCAGAGTGTCAATTTTAAGCTCAA   | 75                 |
| HBII-437 snoRNA | small nucleolar RNA, C/D box 108 | AY055807      | Forward: GCTTAATGATGAGAATCATTATTTCTTG<br>Reverse: GACCTCACGCTCCCTTTGC        | 71                 |
| HBII-438 snoRNA | small nucleolar RNA, C/D box 109 | AY055808      | Forward: GGATCGATGATGAGAATAATTGTCTG<br>Reverse: GGACCTCAGATTGACATCTGGAAT     | 67                 |
| UBE3A-1         | UBE3A                            | BC002582      | Forward: TTGGAAGCAATCTTGGGGTA<br>Reverse: GGCTAGCTTCAATGTCGTCAG              | 85                 |
| UBE3A-2         | UBE3A                            | BC002582      | Forward: AAGCTGCACCAGTGTATTGG<br>Reverse: GTACCCCAAGATTGCTTCCA               | 68                 |
| IPW-AS1         | UBE3A-antisense RNA              | AF400501      | Forward: AAGCATTCAAAGACGGCAAC<br>Reverse: CACTAATTTCACTCAGATTCAAGGAG         | 72                 |
| IPW-AS2         | UBE3A-antisense RNA              | AF400500      | Forward: CCTGGAATCTGATCCTCCAC<br>Reverse: CTGAGGTAGGAGAATCGTTTTGAA           | 108                |
| IPW 115-1       | IPW 115 host gene                | AF400493      | Forward: CTTCTCACACCCTGGTCTC<br>Reverse: GACTTCAAGAAATGCGTGCTC               | 100                |
| IPW 115 -2      | IPW 115 host gene                | U12897        | Forward: TGCAACCGTTGTTTAAGGATG<br>Reverse: CCCTGAACAACAGGTTAAAGG             | 73                 |
| IPW 116         | IPW 116 host gene                | AF400486      | Forward: CTGGTGGATCCCACAGGT<br>Reverse: AGAAGCCCACGCCACATA                   | 130                |

**Table S2. Contigs representing 5'-cap structure containing transcripts supported by Hidden Markov model**

| <b>Cell line/cellular compartments</b> | <b>chr</b> | <b>start</b> | <b>stop</b> | <b>Name</b>                            | <b>orientation</b> |
|----------------------------------------|------------|--------------|-------------|----------------------------------------|--------------------|
| A549CytosolPapTssHmm                   | chr15      | 25364746     | 25364766    | chr15:25364746:25364766+:0.000003      | +                  |
| A549CytosolPapTssHmm                   | chr15      | 25364964     | 25364974    | chr15:25364964:25364974+:0.000000      | +                  |
| A549CytosolPapTssHmm                   | chr15      | 25365325     | 25365338    | chr15:25365325:25365338+:0.000000      | +                  |
| A549CytosolPapTssHmm                   | chr15      | 25367145     | 25367240    | chr15:25367145:25367240+:0.000000      | +                  |
| A549NucleusPapTssHmm                   | chr15      | 25362130     | 25362292    | chr15:25362130:25362292+:0.000035      | +                  |
| A549NucleusPapTssHmm                   | chr15      | 25364746     | 25364766    | chr15:25364746:25364766+:0.000003      | +                  |
| A549NucleusPapTssHmm                   | chr15      | 25364964     | 25364974    | chr15:25364964:25364974+:0.000000      | +                  |
| A549NucleusPapTssHmm                   | chr15      | 25365325     | 25365338    | chr15:25365325:25365338+:0.000000      | +                  |
| A549NucleusPapTssHmm                   | chr15      | 25365525     | 25365550    | chr15:25365525:25365550+:0.000000      | +                  |
| A549NucleusPapTssHmm                   | chr15      | 25367145     | 25367240    | chr15:25367145:25367240+:0.000000      | +                  |
| A549NucleusPapTssHmm                   | chr15      | 25374636     | 25374674    | chr15:25374636:25374674+:0.000000      | +                  |
| Ag04450CellPapTssHmm                   | chr15      | 25357809     | 25357989    | chr15:25357809:25357989+:1.48:0.000001 | +                  |
| Ag04450CellPapTssHmm                   | chr15      | 25362132     | 25362307    | chr15:25362132:25362307+:1.51:0.015994 | +                  |
| Cd20CellPapTssHmm                      | chr15      | 25365330     | 25365364    | chr15:25365330:25365364+:0.000000      | +                  |
| Cd20CellPapTssHmm                      | chr15      | 25367145     | 25367196    | chr15:25367145:25367196+:0.000000      | +                  |
| Cd34mobilizedCellPapTssHmm             | chr15      | 25367146     | 25367234    | chr15:25367146:25367234+:0.000000      | +                  |
| Gm12878CellPapTssHmm                   | chr15      | 25357798     | 25357992    | chr15:25357798:25357992+:0.14:0.000001 | +                  |
| Gm12878CellPapTssHmm                   | chr15      | 25358786     | 25358833    | chr15:25358786:25358833+:2.07:0.004112 | +                  |
| Gm12878CellPapTssHmm                   | chr15      | 25362131     | 25362293    | chr15:25362131:25362293+:0.09:0.025453 | +                  |
| Gm12878CellPapTssHmm                   | chr15      | 25365314     | 25365476    | chr15:25365314:25365476+:0.21:0.000065 | +                  |
| Gm12878CellPapTssHmm                   | chr15      | 25367112     | 25367248    | chr15:25367112:25367248+:0.43:0.000000 | +                  |
| Gm12878CellPapTssHmm                   | chr15      | 25374545     | 25374674    | chr15:25374545:25374674+:0.14:0.000772 | +                  |
| Gm12878CytosolPamTssHmm                | chr15      | 25366763     | 25366817    | chr15:25366763:25366817+:0.12:0.000011 | +                  |
| Gm12878CytosolPamTssHmm                | chr15      | 25367370     | 25367383    | chr15:25367370:25367383+:1.78:0.000005 | +                  |
| Gm12878CytosolPamTssHmm                | chr15      | 25368648     | 25368658    | chr15:25368648:25368658+:3.37:0.000043 | +                  |
| Gm12878CytosolPamTssHmm                | chr15      | 25561532     | 25561665    | chr15:25561532:25561665+:1.95:0.000013 | +                  |
| Gm12878CytosolPamTssHmmV2              | chr15      | 25366763     | 25366817    | chr15:25366763:25366817+:0.12:0.000011 | +                  |

|                               |       |          |          |                                         |   |
|-------------------------------|-------|----------|----------|-----------------------------------------|---|
| Gm12878CytosolPamTssHmmV2     | chr15 | 25367370 | 25367383 | chr15:25367370:25367383:+:1.78:0.000005 | + |
| Gm12878CytosolPamTssHmmV2     | chr15 | 25368648 | 25368658 | chr15:25368648:25368658:+:3.37:0.000043 | + |
| Gm12878CytosolPamTssHmmV2     | chr15 | 25561532 | 25561665 | chr15:25561532:25561665:+:1.95:0.000013 | + |
| Gm12878CytosolPapTssHmm       | chr15 | 25357798 | 25357992 | chr15:25357798:25357992:+:0.14:0.000001 | + |
| Gm12878CytosolPapTssHmm       | chr15 | 25364741 | 25364781 | chr15:25364741:25364781:+:0.04:0.000004 | + |
| Gm12878CytosolPapTssHmm       | chr15 | 25364902 | 25365086 | chr15:25364902:25365086:+:0.14:0.000014 | + |
| Gm12878CytosolPapTssHmm       | chr15 | 25367112 | 25367248 | chr15:25367112:25367248:+:0.43:0.000000 | + |
| Gm12878NucleolusTotalTssHmmV2 | chr15 | 25354398 | 25354479 | chr15:25354398:25354479:+:0.53:0.000002 | + |
| Gm12878NucleolusTotalTssHmmV2 | chr15 | 25356787 | 25356949 | chr15:25356787:25356949:+:0.56:0.000006 | + |
| Gm12878NucleolusTotalTssHmmV2 | chr15 | 25357422 | 25357549 | chr15:25357422:25357549:+:0.63:0.000001 | + |
| Gm12878NucleolusTotalTssHmmV2 | chr15 | 25357798 | 25357992 | chr15:25357798:25357992:+:0.14:0.000001 | + |
| Gm12878NucleolusTotalTssHmmV2 | chr15 | 25358786 | 25358833 | chr15:25358786:25358833:+:2.07:0.004112 | + |
| Gm12878NucleolusTotalTssHmmV2 | chr15 | 25362131 | 25362293 | chr15:25362131:25362293:+:0.09:0.025453 | + |
| Gm12878NucleolusTotalTssHmmV2 | chr15 | 25362661 | 25362663 | chr15:25362661:25362663:+:5.36:0.000095 | + |
| Gm12878NucleolusTotalTssHmmV2 | chr15 | 25363348 | 25363358 | chr15:25363348:25363358:+:3.86:0.000000 | + |
| Gm12878NucleolusTotalTssHmmV2 | chr15 | 25364741 | 25364781 | chr15:25364741:25364781:+:0.04:0.000004 | + |
| Gm12878NucleolusTotalTssHmmV2 | chr15 | 25364902 | 25365086 | chr15:25364902:25365086:+:0.14:0.000014 | + |
| Gm12878NucleolusTotalTssHmmV2 | chr15 | 25365314 | 25365476 | chr15:25365314:25365476:+:0.21:0.000065 | + |
| Gm12878NucleolusTotalTssHmmV2 | chr15 | 25366479 | 25366493 | chr15:25366479:25366493:+:0.55:0.000048 | + |
| Gm12878NucleolusTotalTssHmmV2 | chr15 | 25366763 | 25366817 | chr15:25366763:25366817:+:0.12:0.000011 | + |
| Gm12878NucleolusTotalTssHmmV2 | chr15 | 25367112 | 25367248 | chr15:25367112:25367248:+:0.43:0.000000 | + |
| Gm12878NucleolusTotalTssHmmV2 | chr15 | 25367370 | 25367383 | chr15:25367370:25367383:+:1.78:0.000005 | + |
| Gm12878NucleolusTotalTssHmmV2 | chr15 | 25367514 | 25367576 | chr15:25367514:25367576:+:0.69:0.000003 | + |
| Gm12878NucleolusTotalTssHmmV2 | chr15 | 25368648 | 25368658 | chr15:25368648:25368658:+:3.37:0.000043 | + |
| Gm12878NucleolusTotalTssHmmV2 | chr15 | 25374545 | 25374674 | chr15:25374545:25374674:+:0.14:0.000772 | + |
| Gm12878NucleolusTotalTssHmmV2 | chr15 | 25414316 | 25414341 | chr15:25414316:25414341:+:2.42:0.000028 | + |
| Gm12878NucleolusTotalTssHmmV2 | chr15 | 25499039 | 25499115 | chr15:25499039:25499115:+:2.21:0.436841 | + |
| Gm12878NucleusPapTssHmm       | chr15 | 25357422 | 25357549 | chr15:25357422:25357549:+:0.63:0.000001 | + |
| Gm12878NucleusPapTssHmm       | chr15 | 25357798 | 25357992 | chr15:25357798:25357992:+:0.14:0.000001 | + |
| Gm12878NucleusPapTssHmm       | chr15 | 25358786 | 25358833 | chr15:25358786:25358833:+:2.07:0.004112 | + |

|                         |       |          |          |                                         |   |
|-------------------------|-------|----------|----------|-----------------------------------------|---|
| Gm12878NucleusPapTssHmm | chr15 | 25362131 | 25362293 | chr15:25362131:25362293:+:0.09:0.025453 | + |
| Gm12878NucleusPapTssHmm | chr15 | 25363348 | 25363358 | chr15:25363348:25363358:+:3.86:0.000000 | + |
| Gm12878NucleusPapTssHmm | chr15 | 25364741 | 25364781 | chr15:25364741:25364781:+:0.04:0.000004 | + |
| Gm12878NucleusPapTssHmm | chr15 | 25365314 | 25365476 | chr15:25365314:25365476:+:0.21:0.000065 | + |
| Gm12878NucleusPapTssHmm | chr15 | 25366763 | 25366817 | chr15:25366763:25366817:+:0.12:0.000011 | + |
| Gm12878NucleusPapTssHmm | chr15 | 25367112 | 25367248 | chr15:25367112:25367248:+:0.43:0.000000 | + |
| Gm12878NucleusPapTssHmm | chr15 | 25414316 | 25414341 | chr15:25414316:25414341:+:2.42:0.000028 | + |
| H1hesCellPamTssHmmV2    | chr15 | 25354359 | 25354405 | chr15:25354359:25354405:+:0.60:0.000013 | + |
| H1hesCellPamTssHmmV2    | chr15 | 25354696 | 25354865 | chr15:25354696:25354865:+:0.10:0.000099 | + |
| H1hesCellPamTssHmmV2    | chr15 | 25356917 | 25357044 | chr15:25356917:25357044:+:0.49:0.084714 | + |
| H1hesCellPamTssHmmV2    | chr15 | 25357557 | 25357559 | chr15:25357557:25357559:+:1.34:0.000408 | + |
| H1hesCellPamTssHmmV2    | chr15 | 25357600 | 25357630 | chr15:25357600:25357630:+:1.17:0.000020 | + |
| H1hesCellPamTssHmmV2    | chr15 | 25357779 | 25357967 | chr15:25357779:25357967:+:0.02:0.000004 | + |
| H1hesCellPamTssHmmV2    | chr15 | 25358148 | 25358246 | chr15:25358148:25358246:+:0.44:0.000581 | + |
| H1hesCellPamTssHmmV2    | chr15 | 25358361 | 25358386 | chr15:25358361:25358386:+:0.94:0.000001 | + |
| H1hesCellPamTssHmmV2    | chr15 | 25358781 | 25358833 | chr15:25358781:25358833:+:0.88:0.000882 | + |
| H1hesCellPamTssHmmV2    | chr15 | 25359054 | 25359090 | chr15:25359054:25359090:+:0.36:0.000412 | + |
| H1hesCellPamTssHmmV2    | chr15 | 25359172 | 25359184 | chr15:25359172:25359184:+:1.19:0.000000 | + |
| H1hesCellPamTssHmmV2    | chr15 | 25360419 | 25360566 | chr15:25360419:25360566:+:0.02:0.001060 | + |
| H1hesCellPamTssHmmV2    | chr15 | 25360660 | 25360688 | chr15:25360660:25360688:+:0.68:0.997440 | + |
| H1hesCellPamTssHmmV2    | chr15 | 25360774 | 25360804 | chr15:25360774:25360804:+:0.15:0.010918 | + |
| H1hesCellPamTssHmmV2    | chr15 | 25361557 | 25361614 | chr15:25361557:25361614:+:0.81:0.000045 | + |
| H1hesCellPamTssHmmV2    | chr15 | 25361743 | 25361753 | chr15:25361743:25361753:+:0.36:0.000000 | + |
| H1hesCellPamTssHmmV2    | chr15 | 25362118 | 25362271 | chr15:25362118:25362271:+:1.36:0.015835 | + |
| H1hesCellPamTssHmmV2    | chr15 | 25362571 | 25362599 | chr15:25362571:25362599:+:0.55:0.000084 | + |
| H1hesCellPamTssHmmV2    | chr15 | 25363348 | 25363358 | chr15:25363348:25363358:+:4.32:0.000000 | + |
| H1hesCellPamTssHmmV2    | chr15 | 25364377 | 25364473 | chr15:25364377:25364473:+:0.19:0.000046 | + |
| H1hesCellPamTssHmmV2    | chr15 | 25364865 | 25364867 | chr15:25364865:25364867:+:2.93:0.000041 | + |
| H1hesCellPamTssHmmV2    | chr15 | 25364959 | 25364971 | chr15:25364959:25364971:+:0.93:0.000000 | + |
| H1hesCellPamTssHmmV2    | chr15 | 25365036 | 25365057 | chr15:25365036:25365057:+:0.76:0.000000 | + |

|                      |       |          |          |                                         |   |
|----------------------|-------|----------|----------|-----------------------------------------|---|
| H1hesCellPamTssHmmV2 | chr15 | 25365237 | 25365240 | chr15:25365237:25365240:+:0.93:0.000000 | + |
| H1hesCellPamTssHmmV2 | chr15 | 25365323 | 25365383 | chr15:25365323:25365383:+:0.01:0.001381 | + |
| H1hesCellPamTssHmmV2 | chr15 | 25365526 | 25365549 | chr15:25365526:25365549:+:0.06:0.000000 | + |
| H1hesCellPamTssHmmV2 | chr15 | 25365864 | 25365892 | chr15:25365864:25365892:+:0.94:0.000174 | + |
| H1hesCellPamTssHmmV2 | chr15 | 25366040 | 25366051 | chr15:25366040:25366051:+:0.35:0.000000 | + |
| H1hesCellPamTssHmmV2 | chr15 | 25366392 | 25366399 | chr15:25366392:25366399:+:0.94:0.000289 | + |
| H1hesCellPamTssHmmV2 | chr15 | 25366487 | 25366505 | chr15:25366487:25366505:+:0.94:0.000155 | + |
| H1hesCellPamTssHmmV2 | chr15 | 25366648 | 25366666 | chr15:25366648:25366666:+:0.71:0.000158 | + |
| H1hesCellPamTssHmmV2 | chr15 | 25366802 | 25366818 | chr15:25366802:25366818:+:2.27:0.000006 | + |
| H1hesCellPamTssHmmV2 | chr15 | 25367141 | 25367247 | chr15:25367141:25367247:+:0.89:0.000066 | + |
| H1hesCellPamTssHmmV2 | chr15 | 25367362 | 25367387 | chr15:25367362:25367387:+:0.34:0.000008 | + |
| H1hesCellPamTssHmmV2 | chr15 | 25367444 | 25367488 | chr15:25367444:25367488:+:1.21:0.000006 | + |
| H1hesCellPamTssHmmV2 | chr15 | 25370368 | 25370543 | chr15:25370368:25370543:+:0.66:0.000003 | + |
| H1hesCellPamTssHmmV2 | chr15 | 25370737 | 25370763 | chr15:25370737:25370763:+:0.52:0.000002 | + |
| H1hesCellPamTssHmmV2 | chr15 | 25370927 | 25371079 | chr15:25370927:25371079:+:0.45:0.000001 | + |
| H1hesCellPamTssHmmV2 | chr15 | 25372164 | 25372168 | chr15:25372164:25372168:+:3.01:0.000001 | + |
| H1hesCellPamTssHmmV2 | chr15 | 25373120 | 25373264 | chr15:25373120:25373264:+:0.03:0.000001 | + |
| H1hesCellPamTssHmmV2 | chr15 | 25373749 | 25373812 | chr15:25373749:25373812:+:0.83:0.003805 | + |
| H1hesCellPamTssHmmV2 | chr15 | 25373909 | 25373964 | chr15:25373909:25373964:+:0.45:0.000002 | + |
| H1hesCellPamTssHmmV2 | chr15 | 25374331 | 25374363 | chr15:25374331:25374363:+:0.57:0.000063 | + |
| H1hesCellPamTssHmmV2 | chr15 | 25374633 | 25374710 | chr15:25374633:25374710:+:0.52:0.000000 | + |
| H1hesCellPamTssHmmV2 | chr15 | 25374976 | 25375013 | chr15:25374976:25375013:+:1.57:0.001266 | + |
| H1hesCellPamTssHmmV2 | chr15 | 25375554 | 25375608 | chr15:25375554:25375608:+:0.10:0.000002 | + |
| H1hesCellPamTssHmmV2 | chr15 | 25375956 | 25376109 | chr15:25375956:25376109:+:0.03:0.000000 | + |
| H1hesCellPamTssHmmV2 | chr15 | 25376741 | 25376765 | chr15:25376741:25376765:+:0.40:0.000072 | + |
| H1hesCellPapTssHmm   | chr15 | 25354142 | 25354183 | chr15:25354142:25354183:+:1.28:0.000201 | + |
| H1hesCellPapTssHmm   | chr15 | 25354359 | 25354405 | chr15:25354359:25354405:+:0.60:0.000013 | + |
| H1hesCellPapTssHmm   | chr15 | 25354696 | 25354865 | chr15:25354696:25354865:+:0.10:0.000099 | + |
| H1hesCellPapTssHmm   | chr15 | 25356917 | 25357044 | chr15:25356917:25357044:+:0.49:0.084714 | + |
| H1hesCellPapTssHmm   | chr15 | 25357463 | 25357472 | chr15:25357463:25357472:+:1.34:0.000003 | + |

|                    |       |          |          |                                         |   |
|--------------------|-------|----------|----------|-----------------------------------------|---|
| H1hesCellPapTssHmm | chr15 | 25357600 | 25357630 | chr15:25357600:25357630:+:1.17:0.000020 | + |
| H1hesCellPapTssHmm | chr15 | 25357779 | 25357967 | chr15:25357779:25357967:+:0.02:0.000004 | + |
| H1hesCellPapTssHmm | chr15 | 25357994 | 25358005 | chr15:25357994:25358005:+:0.08:0.000000 | + |
| H1hesCellPapTssHmm | chr15 | 25358148 | 25358246 | chr15:25358148:25358246:+:0.44:0.000581 | + |
| H1hesCellPapTssHmm | chr15 | 25358781 | 25358833 | chr15:25358781:25358833:+:0.88:0.000882 | + |
| H1hesCellPapTssHmm | chr15 | 25359172 | 25359184 | chr15:25359172:25359184:+:1.19:0.000000 | + |
| H1hesCellPapTssHmm | chr15 | 25360419 | 25360566 | chr15:25360419:25360566:+:0.02:0.001060 | + |
| H1hesCellPapTssHmm | chr15 | 25360774 | 25360804 | chr15:25360774:25360804:+:0.15:0.010918 | + |
| H1hesCellPapTssHmm | chr15 | 25361557 | 25361614 | chr15:25361557:25361614:+:0.81:0.000045 | + |
| H1hesCellPapTssHmm | chr15 | 25362118 | 25362271 | chr15:25362118:25362271:+:1.36:0.015835 | + |
| H1hesCellPapTssHmm | chr15 | 25363348 | 25363358 | chr15:25363348:25363358:+:4.32:0.000000 | + |
| H1hesCellPapTssHmm | chr15 | 25364242 | 25364248 | chr15:25364242:25364248:+:1.32:0.003601 | + |
| H1hesCellPapTssHmm | chr15 | 25364377 | 25364473 | chr15:25364377:25364473:+:0.19:0.000046 | + |
| H1hesCellPapTssHmm | chr15 | 25364709 | 25364721 | chr15:25364709:25364721:+:0.50:0.000007 | + |
| H1hesCellPapTssHmm | chr15 | 25364743 | 25364767 | chr15:25364743:25364767:+:0.93:0.000015 | + |
| H1hesCellPapTssHmm | chr15 | 25364820 | 25364827 | chr15:25364820:25364827:+:0.93:0.000110 | + |
| H1hesCellPapTssHmm | chr15 | 25364959 | 25364971 | chr15:25364959:25364971:+:0.93:0.000000 | + |
| H1hesCellPapTssHmm | chr15 | 25365036 | 25365057 | chr15:25365036:25365057:+:0.76:0.000000 | + |
| H1hesCellPapTssHmm | chr15 | 25365255 | 25365262 | chr15:25365255:25365262:+:0.52:0.000000 | + |
| H1hesCellPapTssHmm | chr15 | 25365323 | 25365383 | chr15:25365323:25365383:+:0.01:0.001381 | + |
| H1hesCellPapTssHmm | chr15 | 25365526 | 25365549 | chr15:25365526:25365549:+:0.06:0.000000 | + |
| H1hesCellPapTssHmm | chr15 | 25365864 | 25365892 | chr15:25365864:25365892:+:0.94:0.000174 | + |
| H1hesCellPapTssHmm | chr15 | 25365965 | 25365971 | chr15:25365965:25365971:+:0.35:0.000000 | + |
| H1hesCellPapTssHmm | chr15 | 25366040 | 25366051 | chr15:25366040:25366051:+:0.35:0.000000 | + |
| H1hesCellPapTssHmm | chr15 | 25366802 | 25366818 | chr15:25366802:25366818:+:2.27:0.000006 | + |
| H1hesCellPapTssHmm | chr15 | 25366981 | 25366986 | chr15:25366981:25366986:+:0.89:0.000000 | + |
| H1hesCellPapTssHmm | chr15 | 25367024 | 25367029 | chr15:25367024:25367029:+:2.11:0.000000 | + |
| H1hesCellPapTssHmm | chr15 | 25367093 | 25367097 | chr15:25367093:25367097:+:1.47:0.000003 | + |
| H1hesCellPapTssHmm | chr15 | 25367141 | 25367247 | chr15:25367141:25367247:+:0.89:0.000066 | + |
| H1hesCellPapTssHmm | chr15 | 25370927 | 25371079 | chr15:25370927:25371079:+:0.45:0.000001 | + |

|                       |       |          |          |                                         |   |
|-----------------------|-------|----------|----------|-----------------------------------------|---|
| H1hesCellPapTssHmm    | chr15 | 25372164 | 25372168 | chr15:25372164:25372168:+:3.01:0.000001 | + |
| H1hesCellPapTssHmm    | chr15 | 25373120 | 25373264 | chr15:25373120:25373264:+:0.03:0.000001 | + |
| H1hesCellPapTssHmm    | chr15 | 25373909 | 25373964 | chr15:25373909:25373964:+:0.45:0.000002 | + |
| H1hesCellPapTssHmm    | chr15 | 25374633 | 25374710 | chr15:25374633:25374710:+:0.52:0.000000 | + |
| H1hesCellPapTssHmm    | chr15 | 25375956 | 25376109 | chr15:25375956:25376109:+:0.03:0.000000 | + |
| H1hesCellPapTssHmm    | chr15 | 25376235 | 25376291 | chr15:25376235:25376291:+:0.30:0.000094 | + |
| H1hesCytosolPapTssHmm | chr15 | 25357812 | 25357996 | chr15:25357812:25357996:+:0.000000      | + |
| H1hesCytosolPapTssHmm | chr15 | 25364744 | 25364766 | chr15:25364744:25364766:+:0.000000      | + |
| H1hesCytosolPapTssHmm | chr15 | 25365326 | 25365335 | chr15:25365326:25365335:+:0.000000      | + |
| H1hesCytosolPapTssHmm | chr15 | 25367142 | 25367240 | chr15:25367142:25367240:+:0.000003      | + |
| H1hesNucleusPapTssHmm | chr15 | 25354143 | 25354183 | chr15:25354143:25354183:+:0.000016      | + |
| H1hesNucleusPapTssHmm | chr15 | 25354764 | 25354772 | chr15:25354764:25354772:+:0.130194      | + |
| H1hesNucleusPapTssHmm | chr15 | 25357463 | 25357472 | chr15:25357463:25357472:+:0.000026      | + |
| H1hesNucleusPapTssHmm | chr15 | 25357600 | 25357607 | chr15:25357600:25357607:+:0.000020      | + |
| H1hesNucleusPapTssHmm | chr15 | 25357810 | 25357817 | chr15:25357810:25357817:+:0.000004      | + |
| H1hesNucleusPapTssHmm | chr15 | 25357962 | 25357967 | chr15:25357962:25357967:+:0.000000      | + |
| H1hesNucleusPapTssHmm | chr15 | 25358182 | 25358193 | chr15:25358182:25358193:+:0.000139      | + |
| H1hesNucleusPapTssHmm | chr15 | 25358781 | 25358833 | chr15:25358781:25358833:+:0.000573      | + |
| H1hesNucleusPapTssHmm | chr15 | 25362132 | 25362135 | chr15:25362132:25362135:+:0.001191      | + |
| H1hesNucleusPapTssHmm | chr15 | 25362172 | 25362175 | chr15:25362172:25362175:+:0.004341      | + |
| H1hesNucleusPapTssHmm | chr15 | 25364743 | 25364766 | chr15:25364743:25364766:+:0.000025      | + |
| H1hesNucleusPapTssHmm | chr15 | 25364821 | 25364827 | chr15:25364821:25364827:+:0.000022      | + |
| H1hesNucleusPapTssHmm | chr15 | 25364962 | 25364970 | chr15:25364962:25364970:+:0.000001      | + |
| H1hesNucleusPapTssHmm | chr15 | 25365325 | 25365338 | chr15:25365325:25365338:+:0.000000      | + |
| H1hesNucleusPapTssHmm | chr15 | 25365542 | 25365548 | chr15:25365542:25365548:+:0.000000      | + |
| H1hesNucleusPapTssHmm | chr15 | 25365864 | 25365867 | chr15:25365864:25365867:+:0.000008      | + |
| H1hesNucleusPapTssHmm | chr15 | 25366812 | 25366818 | chr15:25366812:25366818:+:0.000001      | + |
| H1hesNucleusPapTssHmm | chr15 | 25367141 | 25367241 | chr15:25367141:25367241:+:0.000037      | + |
| H1hesNucleusPapTssHmm | chr15 | 25373749 | 25373752 | chr15:25373749:25373752:+:0.015137      | + |
| H1hesNucleusPapTssHmm | chr15 | 25374669 | 25374674 | chr15:25374669:25374674:+:0.000225      | + |



|                          |       |          |          |                                         |   |
|--------------------------|-------|----------|----------|-----------------------------------------|---|
| Helas3CellPapTssHmm      | chr15 | 25584216 | 25584378 | chr15:25584216:25584378:+:2.03:0.000000 | + |
| Helas3CytosolPamTssHmm   | chr15 | 25584216 | 25584378 | chr15:25584216:25584378:+:2.03:0.000000 | + |
| Helas3CytosolPamTssHmmV2 | chr15 | 25584216 | 25584378 | chr15:25584216:25584378:+:2.03:0.000000 | + |
| Hepg2CellPapTssHmmV2     | chr15 | 25354371 | 25354510 | chr15:25354371:25354510:+:0.05:0.000045 | + |
| Hepg2CellPapTssHmmV2     | chr15 | 25354707 | 25354824 | chr15:25354707:25354824:+:0.69:0.000431 | + |
| Hepg2CellPapTssHmmV2     | chr15 | 25356851 | 25356983 | chr15:25356851:25356983:+:0.33:0.000119 | + |
| Hepg2CellPapTssHmmV2     | chr15 | 25357553 | 25357604 | chr15:25357553:25357604:+:1.00:0.000282 | + |
| Hepg2CellPapTssHmmV2     | chr15 | 25357813 | 25357822 | chr15:25357813:25357822:+:2.11:0.000002 | + |
| Hepg2CellPapTssHmmV2     | chr15 | 25357919 | 25358048 | chr15:25357919:25358048:+:0.04:0.000001 | + |
| Hepg2CellPapTssHmmV2     | chr15 | 25358770 | 25358831 | chr15:25358770:25358831:+:1.67:0.000584 | + |
| Hepg2CellPapTssHmmV2     | chr15 | 25360797 | 25360855 | chr15:25360797:25360855:+:0.19:0.000011 | + |
| Hepg2CellPapTssHmmV2     | chr15 | 25362117 | 25362315 | chr15:25362117:25362315:+:0.26:0.050451 | + |
| Hepg2CellPapTssHmmV2     | chr15 | 25363315 | 25363365 | chr15:25363315:25363365:+:0.03:0.000000 | + |
| Hepg2CellPapTssHmmV2     | chr15 | 25364377 | 25364414 | chr15:25364377:25364414:+:0.13:0.000046 | + |
| Hepg2CellPapTssHmmV2     | chr15 | 25364551 | 25364572 | chr15:25364551:25364572:+:0.22:0.000000 | + |
| Hepg2CellPapTssHmmV2     | chr15 | 25364742 | 25364802 | chr15:25364742:25364802:+:0.32:0.000004 | + |
| Hepg2CellPapTssHmmV2     | chr15 | 25364885 | 25364914 | chr15:25364885:25364914:+:0.15:0.000002 | + |
| Hepg2CellPapTssHmmV2     | chr15 | 25364964 | 25365005 | chr15:25364964:25365005:+:0.37:0.000000 | + |
| Hepg2CellPapTssHmmV2     | chr15 | 25365223 | 25365256 | chr15:25365223:25365256:+:0.31:0.000000 | + |
| Hepg2CellPapTssHmmV2     | chr15 | 25365315 | 25365440 | chr15:25365315:25365440:+:0.13:0.000051 | + |
| Hepg2CellPapTssHmmV2     | chr15 | 25365521 | 25365568 | chr15:25365521:25365568:+:0.10:0.000000 | + |
| Hepg2CellPapTssHmmV2     | chr15 | 25367192 | 25367302 | chr15:25367192:25367302:+:0.18:0.000002 | + |
| Hepg2CellPapTssHmmV2     | chr15 | 25367516 | 25367520 | chr15:25367516:25367520:+:0.59:0.000002 | + |
| Hepg2CellPapTssHmmV2     | chr15 | 25374516 | 25374675 | chr15:25374516:25374675:+:0.32:0.000040 | + |
| Hepg2CellPapTssHmmV2     | chr15 | 25376206 | 25376265 | chr15:25376206:25376265:+:0.40:0.000013 | + |
| Hepg2CellPapTssHmmV2     | chr15 | 25379672 | 25379692 | chr15:25379672:25379692:+:1.96:0.000308 | + |
| Hepg2CellPapTssHmmV2     | chr15 | 25392307 | 25392494 | chr15:25392307:25392494:+:0.11:0.000019 | + |
| Hepg2CellPapTssHmmV2     | chr15 | 25394827 | 25394964 | chr15:25394827:25394964:+:0.66:0.000051 | + |
| Hepg2CellPapTssHmmV2     | chr15 | 25395877 | 25396061 | chr15:25395877:25396061:+:0.18:0.000008 | + |
| Hepg2CellPapTssHmmV2     | chr15 | 25396383 | 25396552 | chr15:25396383:25396552:+:0.49:0.000000 | + |

|                             |       |          |          |                                         |   |
|-----------------------------|-------|----------|----------|-----------------------------------------|---|
| Hepg2CytosolPamTssHmmV2     | chr15 | 25360797 | 25360855 | chr15:25360797:25360855:+:0.19:0.000011 | + |
| Hepg2CytosolPamTssHmmV2     | chr15 | 25363315 | 25363365 | chr15:25363315:25363365:+:0.03:0.000000 | + |
| Hepg2CytosolPamTssHmmV2     | chr15 | 25364377 | 25364414 | chr15:25364377:25364414:+:0.13:0.000046 | + |
| Hepg2CytosolPamTssHmmV2     | chr15 | 25364742 | 25364802 | chr15:25364742:25364802:+:0.32:0.000004 | + |
| Hepg2CytosolPamTssHmmV2     | chr15 | 25364885 | 25364914 | chr15:25364885:25364914:+:0.15:0.000002 | + |
| Hepg2CytosolPamTssHmmV2     | chr15 | 25365315 | 25365440 | chr15:25365315:25365440:+:0.13:0.000051 | + |
| Hepg2CytosolPamTssHmmV2     | chr15 | 25365953 | 25365975 | chr15:25365953:25365975:+:1.00:0.000000 | + |
| Hepg2CytosolPamTssHmmV2     | chr15 | 25366746 | 25366762 | chr15:25366746:25366762:+:0.62:0.000158 | + |
| Hepg2CytosolPamTssHmmV2     | chr15 | 25366812 | 25366826 | chr15:25366812:25366826:+:0.28:0.000004 | + |
| Hepg2CytosolPamTssHmmV2     | chr15 | 25367070 | 25367099 | chr15:25367070:25367099:+:0.01:0.000000 | + |
| Hepg2CytosolPamTssHmmV2     | chr15 | 25368625 | 25368762 | chr15:25368625:25368762:+:0.19:0.000352 | + |
| Hepg2CytosolPamTssHmmV2     | chr15 | 25369080 | 25369200 | chr15:25369080:25369200:+:0.77:0.000017 | + |
| Hepg2CytosolPamTssHmmV2     | chr15 | 25370873 | 25370892 | chr15:25370873:25370892:+:0.21:0.000008 | + |
| Hepg2CytosolPamTssHmmV2     | chr15 | 25375612 | 25375729 | chr15:25375612:25375729:+:0.02:0.000000 | + |
| Hepg2CytosolPamTssHmmV2     | chr15 | 25379672 | 25379692 | chr15:25379672:25379692:+:1.96:0.000308 | + |
| Hepg2CytosolPamTssHmmV2     | chr15 | 25381056 | 25381198 | chr15:25381056:25381198:+:0.24:0.000000 | + |
| Hepg2CytosolPamTssHmmV2     | chr15 | 25449912 | 25449914 | chr15:25449912:25449914:+:6.47:0.035408 | + |
| Hepg2CytosolPamTssHmmV2     | chr15 | 25475948 | 25475986 | chr15:25475948:25475986:+:1.07:0.036127 | + |
| Hepg2CytosolPamTssHmmV2     | chr15 | 25553349 | 25553507 | chr15:25553349:25553507:+:0.71:0.000012 | + |
| Hepg2CytosolPamTssHmmV2     | chr15 | 25564110 | 25564267 | chr15:25564110:25564267:+:0.39:0.000008 | + |
| Hepg2CytosolPamTssHmmV2     | chr15 | 25584117 | 25584225 | chr15:25584117:25584225:+:0.37:0.000005 | + |
| Hepg2CytosolPamTssHmmV2     | chr15 | 25585317 | 25585398 | chr15:25585317:25585398:+:0.68:0.000067 | + |
| Hepg2CytosolPapTssHmm       | chr15 | 25354371 | 25354510 | chr15:25354371:25354510:+:0.05:0.000045 | + |
| Hepg2CytosolPapTssHmm       | chr15 | 25354707 | 25354824 | chr15:25354707:25354824:+:0.69:0.000431 | + |
| Hepg2CytosolPapTssHmm       | chr15 | 25365315 | 25365440 | chr15:25365315:25365440:+:0.13:0.000051 | + |
| Hepg2CytosolPapTssHmm       | chr15 | 25367192 | 25367302 | chr15:25367192:25367302:+:0.18:0.000002 | + |
| Hepg2CytosolPapTssHmm       | chr15 | 25379672 | 25379692 | chr15:25379672:25379692:+:1.96:0.000308 | + |
| Hepg2NucleolusTotalTssHmmV3 | chr15 | 25354371 | 25354510 | chr15:25354371:25354510:+:0.05:0.000045 | + |
| Hepg2NucleolusTotalTssHmmV3 | chr15 | 25354707 | 25354824 | chr15:25354707:25354824:+:0.69:0.000431 | + |
| Hepg2NucleolusTotalTssHmmV3 | chr15 | 25355102 | 25355125 | chr15:25355102:25355125:+:0.69:0.000182 | + |

|                             |       |          |          |                                         |   |
|-----------------------------|-------|----------|----------|-----------------------------------------|---|
| Hepg2NucleolusTotalTssHmmV3 | chr15 | 25355199 | 25355213 | chr15:25355199:25355213:+:1.23:0.465299 | + |
| Hepg2NucleolusTotalTssHmmV3 | chr15 | 25356851 | 25356983 | chr15:25356851:25356983:+:0.33:0.000119 | + |
| Hepg2NucleolusTotalTssHmmV3 | chr15 | 25357074 | 25357089 | chr15:25357074:25357089:+:0.56:0.000431 | + |
| Hepg2NucleolusTotalTssHmmV3 | chr15 | 25357553 | 25357604 | chr15:25357553:25357604:+:1.00:0.000282 | + |
| Hepg2NucleolusTotalTssHmmV3 | chr15 | 25357813 | 25357822 | chr15:25357813:25357822:+:2.11:0.000002 | + |
| Hepg2NucleolusTotalTssHmmV3 | chr15 | 25358770 | 25358831 | chr15:25358770:25358831:+:1.67:0.000584 | + |
| Hepg2NucleolusTotalTssHmmV3 | chr15 | 25360797 | 25360855 | chr15:25360797:25360855:+:0.19:0.000011 | + |
| Hepg2NucleolusTotalTssHmmV3 | chr15 | 25361181 | 25361223 | chr15:25361181:25361223:+:0.07:0.000000 | + |
| Hepg2NucleolusTotalTssHmmV3 | chr15 | 25361451 | 25361516 | chr15:25361451:25361516:+:0.33:0.000000 | + |
| Hepg2NucleolusTotalTssHmmV3 | chr15 | 25361757 | 25361893 | chr15:25361757:25361893:+:0.27:0.000000 | + |
| Hepg2NucleolusTotalTssHmmV3 | chr15 | 25362117 | 25362315 | chr15:25362117:25362315:+:0.26:0.050451 | + |
| Hepg2NucleolusTotalTssHmmV3 | chr15 | 25362613 | 25362741 | chr15:25362613:25362741:+:0.12:0.001306 | + |
| Hepg2NucleolusTotalTssHmmV3 | chr15 | 25362893 | 25363061 | chr15:25362893:25363061:+:0.24:0.003903 | + |
| Hepg2NucleolusTotalTssHmmV3 | chr15 | 25363315 | 25363365 | chr15:25363315:25363365:+:0.03:0.000000 | + |
| Hepg2NucleolusTotalTssHmmV3 | chr15 | 25364551 | 25364572 | chr15:25364551:25364572:+:0.22:0.000000 | + |
| Hepg2NucleolusTotalTssHmmV3 | chr15 | 25364619 | 25364628 | chr15:25364619:25364628:+:1.00:0.000000 | + |
| Hepg2NucleolusTotalTssHmmV3 | chr15 | 25364742 | 25364802 | chr15:25364742:25364802:+:0.32:0.000004 | + |
| Hepg2NucleolusTotalTssHmmV3 | chr15 | 25364885 | 25364914 | chr15:25364885:25364914:+:0.15:0.000002 | + |
| Hepg2NucleolusTotalTssHmmV3 | chr15 | 25364964 | 25365005 | chr15:25364964:25365005:+:0.37:0.000000 | + |
| Hepg2NucleolusTotalTssHmmV3 | chr15 | 25365223 | 25365256 | chr15:25365223:25365256:+:0.31:0.000000 | + |
| Hepg2NucleolusTotalTssHmmV3 | chr15 | 25365315 | 25365440 | chr15:25365315:25365440:+:0.13:0.000051 | + |
| Hepg2NucleolusTotalTssHmmV3 | chr15 | 25365521 | 25365568 | chr15:25365521:25365568:+:0.10:0.000000 | + |
| Hepg2NucleolusTotalTssHmmV3 | chr15 | 25365760 | 25365769 | chr15:25365760:25365769:+:0.19:0.015085 | + |
| Hepg2NucleolusTotalTssHmmV3 | chr15 | 25365860 | 25365874 | chr15:25365860:25365874:+:0.85:0.000026 | + |
| Hepg2NucleolusTotalTssHmmV3 | chr15 | 25365953 | 25365975 | chr15:25365953:25365975:+:1.00:0.000000 | + |
| Hepg2NucleolusTotalTssHmmV3 | chr15 | 25366007 | 25366010 | chr15:25366007:25366010:+:1.00:0.000000 | + |
| Hepg2NucleolusTotalTssHmmV3 | chr15 | 25366042 | 25366047 | chr15:25366042:25366047:+:1.00:0.000000 | + |
| Hepg2NucleolusTotalTssHmmV3 | chr15 | 25366382 | 25366389 | chr15:25366382:25366389:+:1.32:0.000254 | + |
| Hepg2NucleolusTotalTssHmmV3 | chr15 | 25366462 | 25366464 | chr15:25366462:25366464:+:2.58:0.000025 | + |
| Hepg2NucleolusTotalTssHmmV3 | chr15 | 25366580 | 25366615 | chr15:25366580:25366615:+:0.05:0.000000 | + |

|                             |       |          |          |                                         |   |
|-----------------------------|-------|----------|----------|-----------------------------------------|---|
| Hepg2NucleolusTotalTssHmmV3 | chr15 | 25366655 | 25366667 | chr15:25366655:25366667:+:0.12:0.000136 | + |
| Hepg2NucleolusTotalTssHmmV3 | chr15 | 25366699 | 25366717 | chr15:25366699:25366717:+:0.11:0.001013 | + |
| Hepg2NucleolusTotalTssHmmV3 | chr15 | 25366746 | 25366762 | chr15:25366746:25366762:+:0.62:0.000158 | + |
| Hepg2NucleolusTotalTssHmmV3 | chr15 | 25366812 | 25366826 | chr15:25366812:25366826:+:0.28:0.000004 | + |
| Hepg2NucleolusTotalTssHmmV3 | chr15 | 25366881 | 25366884 | chr15:25366881:25366884:+:0.70:0.000000 | + |
| Hepg2NucleolusTotalTssHmmV3 | chr15 | 25366937 | 25366944 | chr15:25366937:25366944:+:0.19:0.000000 | + |
| Hepg2NucleolusTotalTssHmmV3 | chr15 | 25366957 | 25366962 | chr15:25366957:25366962:+:0.93:0.000000 | + |
| Hepg2NucleolusTotalTssHmmV3 | chr15 | 25366982 | 25366990 | chr15:25366982:25366990:+:0.13:0.000000 | + |
| Hepg2NucleolusTotalTssHmmV3 | chr15 | 25367033 | 25367041 | chr15:25367033:25367041:+:0.68:0.000000 | + |
| Hepg2NucleolusTotalTssHmmV3 | chr15 | 25367070 | 25367099 | chr15:25367070:25367099:+:0.01:0.000000 | + |
| Hepg2NucleolusTotalTssHmmV3 | chr15 | 25367130 | 25367133 | chr15:25367130:25367133:+:1.43:0.000010 | + |
| Hepg2NucleolusTotalTssHmmV3 | chr15 | 25367145 | 25367147 | chr15:25367145:25367147:+:1.43:0.000018 | + |
| Hepg2NucleolusTotalTssHmmV3 | chr15 | 25367172 | 25367179 | chr15:25367172:25367179:+:0.43:0.000007 | + |
| Hepg2NucleolusTotalTssHmmV3 | chr15 | 25367192 | 25367302 | chr15:25367192:25367302:+:0.18:0.000002 | + |
| Hepg2NucleolusTotalTssHmmV3 | chr15 | 25367360 | 25367364 | chr15:25367360:25367364:+:0.59:0.000039 | + |
| Hepg2NucleolusTotalTssHmmV3 | chr15 | 25367376 | 25367411 | chr15:25367376:25367411:+:0.24:0.000007 | + |
| Hepg2NucleolusTotalTssHmmV3 | chr15 | 25367435 | 25367447 | chr15:25367435:25367447:+:0.40:0.000010 | + |
| Hepg2NucleolusTotalTssHmmV3 | chr15 | 25367469 | 25367475 | chr15:25367469:25367475:+:0.07:0.000003 | + |
| Hepg2NucleolusTotalTssHmmV3 | chr15 | 25367516 | 25367520 | chr15:25367516:25367520:+:0.59:0.000002 | + |
| Hepg2NucleolusTotalTssHmmV3 | chr15 | 25367525 | 25367581 | chr15:25367525:25367581:+:0.51:0.000002 | + |
| Hepg2NucleolusTotalTssHmmV3 | chr15 | 25368810 | 25368847 | chr15:25368810:25368847:+:0.06:0.000000 | + |
| Hepg2NucleolusTotalTssHmmV3 | chr15 | 25369080 | 25369200 | chr15:25369080:25369200:+:0.77:0.000017 | + |
| Hepg2NucleolusTotalTssHmmV3 | chr15 | 25369509 | 25369640 | chr15:25369509:25369640:+:0.05:0.000002 | + |
| Hepg2NucleolusTotalTssHmmV3 | chr15 | 25369893 | 25369915 | chr15:25369893:25369915:+:1.03:0.000002 | + |
| Hepg2NucleolusTotalTssHmmV3 | chr15 | 25370119 | 25370238 | chr15:25370119:25370238:+:0.18:0.000000 | + |
| Hepg2NucleolusTotalTssHmmV3 | chr15 | 25370364 | 25370366 | chr15:25370364:25370366:+:3.12:0.000005 | + |
| Hepg2NucleolusTotalTssHmmV3 | chr15 | 25370424 | 25370516 | chr15:25370424:25370516:+:0.12:0.000004 | + |
| Hepg2NucleolusTotalTssHmmV3 | chr15 | 25370873 | 25370892 | chr15:25370873:25370892:+:0.21:0.000008 | + |
| Hepg2NucleolusTotalTssHmmV3 | chr15 | 25371364 | 25371388 | chr15:25371364:25371388:+:1.27:0.000001 | + |
| Hepg2NucleolusTotalTssHmmV3 | chr15 | 25372318 | 25372377 | chr15:25372318:25372377:+:0.64:0.000000 | + |

|                             |       |          |          |                                         |   |
|-----------------------------|-------|----------|----------|-----------------------------------------|---|
| Hepg2NucleolusTotalTssHmmV3 | chr15 | 25372454 | 25372486 | chr15:25372454:25372486:+:0.16:0.000003 | + |
| Hepg2NucleolusTotalTssHmmV3 | chr15 | 25372573 | 25372585 | chr15:25372573:25372585:+:1.47:0.000000 | + |
| Hepg2NucleolusTotalTssHmmV3 | chr15 | 25372737 | 25372761 | chr15:25372737:25372761:+:0.21:0.000003 | + |
| Hepg2NucleolusTotalTssHmmV3 | chr15 | 25373483 | 25373486 | chr15:25373483:25373486:+:4.30:0.001508 | + |
| Hepg2NucleolusTotalTssHmmV3 | chr15 | 25373582 | 25373754 | chr15:25373582:25373754:+:0.42:0.001228 | + |
| Hepg2NucleolusTotalTssHmmV3 | chr15 | 25373992 | 25374007 | chr15:25373992:25374007:+:1.89:0.000000 | + |
| Hepg2NucleolusTotalTssHmmV3 | chr15 | 25374323 | 25374354 | chr15:25374323:25374354:+:0.44:0.000053 | + |
| Hepg2NucleolusTotalTssHmmV3 | chr15 | 25374413 | 25374455 | chr15:25374413:25374455:+:0.51:0.000080 | + |
| Hepg2NucleolusTotalTssHmmV3 | chr15 | 25374516 | 25374675 | chr15:25374516:25374675:+:0.32:0.000040 | + |
| Hepg2NucleolusTotalTssHmmV3 | chr15 | 25374972 | 25374980 | chr15:25374972:25374980:+:1.46:0.000749 | + |
| Hepg2NucleolusTotalTssHmmV3 | chr15 | 25375087 | 25375122 | chr15:25375087:25375122:+:0.14:0.002155 | + |
| Hepg2NucleolusTotalTssHmmV3 | chr15 | 25375432 | 25375461 | chr15:25375432:25375461:+:0.35:0.000044 | + |
| Hepg2NucleolusTotalTssHmmV3 | chr15 | 25375612 | 25375729 | chr15:25375612:25375729:+:0.02:0.000000 | + |
| Hepg2NucleolusTotalTssHmmV3 | chr15 | 25375771 | 25375840 | chr15:25375771:25375840:+:0.63:0.000000 | + |
| Hepg2NucleolusTotalTssHmmV3 | chr15 | 25375992 | 25376113 | chr15:25375992:25376113:+:0.16:0.000000 | + |
| Hepg2NucleolusTotalTssHmmV3 | chr15 | 25376206 | 25376265 | chr15:25376206:25376265:+:0.40:0.000013 | + |
| Hepg2NucleolusTotalTssHmmV3 | chr15 | 25376299 | 25376348 | chr15:25376299:25376348:+:0.03:0.000003 | + |
| Hepg2NucleolusTotalTssHmmV3 | chr15 | 25377027 | 25377118 | chr15:25377027:25377118:+:0.03:0.000000 | + |
| Hepg2NucleolusTotalTssHmmV3 | chr15 | 25377348 | 25377436 | chr15:25377348:25377436:+:0.58:0.000000 | + |
| Hepg2NucleolusTotalTssHmmV3 | chr15 | 25377629 | 25377736 | chr15:25377629:25377736:+:1.22:0.000000 | + |
| Hepg2NucleolusTotalTssHmmV3 | chr15 | 25379672 | 25379692 | chr15:25379672:25379692:+:1.96:0.000308 | + |
| Hepg2NucleolusTotalTssHmmV3 | chr15 | 25380114 | 25380254 | chr15:25380114:25380254:+:0.20:0.112898 | + |
| Hepg2NucleolusTotalTssHmmV3 | chr15 | 25381056 | 25381198 | chr15:25381056:25381198:+:0.24:0.000000 | + |
| Hepg2NucleolusTotalTssHmmV3 | chr15 | 25383706 | 25383718 | chr15:25383706:25383718:+:2.28:0.000002 | + |
| Hepg2NucleolusTotalTssHmmV3 | chr15 | 25383985 | 25384100 | chr15:25383985:25384100:+:0.14:0.000156 | + |
| Hepg2NucleolusTotalTssHmmV3 | chr15 | 25384414 | 25384553 | chr15:25384414:25384553:+:0.38:0.000141 | + |
| Hepg2NucleolusTotalTssHmmV3 | chr15 | 25386593 | 25386676 | chr15:25386593:25386676:+:0.08:0.000339 | + |
| Hepg2NucleolusTotalTssHmmV3 | chr15 | 25386847 | 25387032 | chr15:25386847:25387032:+:0.58:0.000381 | + |
| Hepg2NucleolusTotalTssHmmV3 | chr15 | 25387885 | 25387951 | chr15:25387885:25387951:+:0.11:0.000055 | + |
| Hepg2NucleolusTotalTssHmmV3 | chr15 | 25388952 | 25389002 | chr15:25388952:25389002:+:0.71:0.000021 | + |

|                             |       |          |          |                                         |   |
|-----------------------------|-------|----------|----------|-----------------------------------------|---|
| Hepg2NucleolusTotalTssHmmV3 | chr15 | 25389266 | 25389326 | chr15:25389266:25389326:+:0.56:0.012252 | + |
| Hepg2NucleolusTotalTssHmmV3 | chr15 | 25389966 | 25390107 | chr15:25389966:25390107:+:0.67:0.000650 | + |
| Hepg2NucleolusTotalTssHmmV3 | chr15 | 25391302 | 25391365 | chr15:25391302:25391365:+:0.41:0.000008 | + |
| Hepg2NucleolusTotalTssHmmV3 | chr15 | 25392307 | 25392494 | chr15:25392307:25392494:+:0.11:0.000019 | + |
| Hepg2NucleolusTotalTssHmmV3 | chr15 | 25394026 | 25394180 | chr15:25394026:25394180:+:1.01:0.456536 | + |
| Hepg2NucleolusTotalTssHmmV3 | chr15 | 25394827 | 25394964 | chr15:25394827:25394964:+:0.66:0.000051 | + |
| Hepg2NucleolusTotalTssHmmV3 | chr15 | 25395303 | 25395435 | chr15:25395303:25395435:+:0.02:0.000018 | + |
| Hepg2NucleolusTotalTssHmmV3 | chr15 | 25395877 | 25396061 | chr15:25395877:25396061:+:0.18:0.000008 | + |
| Hepg2NucleolusTotalTssHmmV3 | chr15 | 25396383 | 25396552 | chr15:25396383:25396552:+:0.49:0.000000 | + |
| Hepg2NucleolusTotalTssHmmV3 | chr15 | 25396746 | 25396843 | chr15:25396746:25396843:+:0.54:0.000000 | + |
| Hepg2NucleolusTotalTssHmmV3 | chr15 | 25398520 | 25398653 | chr15:25398520:25398653:+:0.06:0.000000 | + |
| Hepg2NucleolusTotalTssHmmV3 | chr15 | 25399665 | 25399723 | chr15:25399665:25399723:+:1.34:0.000010 | + |
| Hepg2NucleolusTotalTssHmmV3 | chr15 | 25400951 | 25401103 | chr15:25400951:25401103:+:0.50:0.000009 | + |
| Hepg2NucleolusTotalTssHmmV3 | chr15 | 25404221 | 25404409 | chr15:25404221:25404409:+:0.28:0.000058 | + |
| Hepg2NucleolusTotalTssHmmV3 | chr15 | 25404761 | 25404846 | chr15:25404761:25404846:+:1.83:0.001411 | + |
| Hepg2NucleolusTotalTssHmmV3 | chr15 | 25405658 | 25405820 | chr15:25405658:25405820:+:0.58:0.000131 | + |
| Hepg2NucleolusTotalTssHmmV3 | chr15 | 25408745 | 25408894 | chr15:25408745:25408894:+:1.38:0.000003 | + |
| Hepg2NucleolusTotalTssHmmV3 | chr15 | 25410304 | 25410471 | chr15:25410304:25410471:+:0.65:0.000014 | + |
| Hepg2NucleolusTotalTssHmmV3 | chr15 | 25411561 | 25411681 | chr15:25411561:25411681:+:1.13:0.000019 | + |
| Hepg2NucleolusTotalTssHmmV3 | chr15 | 25414436 | 25414600 | chr15:25414436:25414600:+:0.66:0.000430 | + |
| Hepg2NucleolusTotalTssHmmV3 | chr15 | 25414812 | 25414954 | chr15:25414812:25414954:+:0.03:0.977014 | + |
| Hepg2NucleolusTotalTssHmmV3 | chr15 | 25415761 | 25415873 | chr15:25415761:25415873:+:0.94:0.861870 | + |
| Hepg2NucleolusTotalTssHmmV3 | chr15 | 25442722 | 25442725 | chr15:25442722:25442725:+:8.53:0.000336 | + |
| Hepg2NucleolusTotalTssHmmV3 | chr15 | 25449912 | 25449914 | chr15:25449912:25449914:+:6.47:0.035408 | + |
| Hepg2NucleolusTotalTssHmmV3 | chr15 | 25475948 | 25475986 | chr15:25475948:25475986:+:1.07:0.036127 | + |
| Hepg2NucleolusTotalTssHmmV3 | chr15 | 25497078 | 25497080 | chr15:25497078:25497080:+:7.33:0.620100 | + |
| Hepg2NucleolusTotalTssHmmV3 | chr15 | 25499056 | 25499150 | chr15:25499056:25499150:+:0.48:0.698049 | + |
| Hepg2NucleolusTotalTssHmmV3 | chr15 | 25499266 | 25499313 | chr15:25499266:25499313:+:0.75:0.000031 | + |
| Hepg2NucleolusTotalTssHmmV3 | chr15 | 25499664 | 25499765 | chr15:25499664:25499765:+:0.78:0.000093 | + |
| Hepg2NucleolusTotalTssHmmV3 | chr15 | 25507022 | 25507203 | chr15:25507022:25507203:+:0.98:0.000004 | + |

|                             |       |          |          |                                         |   |
|-----------------------------|-------|----------|----------|-----------------------------------------|---|
| Hepg2NucleolusTotalTssHmmV3 | chr15 | 25508496 | 25508621 | chr15:25508496:25508621:+:1.98:0.000185 | + |
| Hepg2NucleolusTotalTssHmmV3 | chr15 | 25510675 | 25510776 | chr15:25510675:25510776:+:0.61:0.000431 | + |
| Hepg2NucleolusTotalTssHmmV3 | chr15 | 25513260 | 25513442 | chr15:25513260:25513442:+:0.86:0.000005 | + |
| Hepg2NucleolusTotalTssHmmV3 | chr15 | 25514113 | 25514241 | chr15:25514113:25514241:+:1.61:0.000000 | + |
| Hepg2NucleolusTotalTssHmmV3 | chr15 | 25524716 | 25524881 | chr15:25524716:25524881:+:1.13:0.000004 | + |
| Hepg2NucleolusTotalTssHmmV3 | chr15 | 25533732 | 25533900 | chr15:25533732:25533900:+:0.08:0.000010 | + |
| Hepg2NucleolusTotalTssHmmV3 | chr15 | 25541335 | 25541460 | chr15:25541335:25541460:+:0.60:0.000002 | + |
| Hepg2NucleolusTotalTssHmmV3 | chr15 | 25545716 | 25545846 | chr15:25545716:25545846:+:0.64:0.000032 | + |
| Hepg2NucleolusTotalTssHmmV3 | chr15 | 25546421 | 25546531 | chr15:25546421:25546531:+:0.24:0.001714 | + |
| Hepg2NucleolusTotalTssHmmV3 | chr15 | 25546754 | 25546862 | chr15:25546754:25546862:+:0.11:0.000001 | + |
| Hepg2NucleolusTotalTssHmmV3 | chr15 | 25549522 | 25549578 | chr15:25549522:25549578:+:1.15:0.000000 | + |
| Hepg2NucleolusTotalTssHmmV3 | chr15 | 25549802 | 25549902 | chr15:25549802:25549902:+:0.09:0.000001 | + |
| Hepg2NucleolusTotalTssHmmV3 | chr15 | 25550037 | 25550055 | chr15:25550037:25550055:+:1.67:0.000000 | + |
| Hepg2NucleolusTotalTssHmmV3 | chr15 | 25552184 | 25552315 | chr15:25552184:25552315:+:0.52:0.000001 | + |
| Hepg2NucleolusTotalTssHmmV3 | chr15 | 25553349 | 25553507 | chr15:25553349:25553507:+:0.71:0.000012 | + |
| Hepg2NucleolusTotalTssHmmV3 | chr15 | 25553775 | 25553859 | chr15:25553775:25553859:+:1.45:0.000000 | + |
| Hepg2NucleolusTotalTssHmmV3 | chr15 | 25555305 | 25555467 | chr15:25555305:25555467:+:0.23:0.000142 | + |
| Hepg2NucleolusTotalTssHmmV3 | chr15 | 25555619 | 25555691 | chr15:25555619:25555691:+:0.10:0.000000 | + |
| Hepg2NucleolusTotalTssHmmV3 | chr15 | 25561281 | 25561421 | chr15:25561281:25561421:+:0.09:0.000055 | + |
| Hepg2NucleolusTotalTssHmmV3 | chr15 | 25562665 | 25562825 | chr15:25562665:25562825:+:0.93:0.000012 | + |
| Hepg2NucleolusTotalTssHmmV3 | chr15 | 25564110 | 25564267 | chr15:25564110:25564267:+:0.39:0.000008 | + |
| Hepg2NucleolusTotalTssHmmV3 | chr15 | 25566468 | 25566550 | chr15:25566468:25566550:+:0.20:0.000075 | + |
| Hepg2NucleolusTotalTssHmmV3 | chr15 | 25579744 | 25579747 | chr15:25579744:25579747:+:5.29:0.000002 | + |
| Hepg2NucleolusTotalTssHmmV3 | chr15 | 25580366 | 25580510 | chr15:25580366:25580510:+:0.07:0.001597 | + |
| Hepg2NucleolusTotalTssHmmV3 | chr15 | 25584117 | 25584225 | chr15:25584117:25584225:+:0.37:0.000005 | + |
| Hepg2NucleolusTotalTssHmmV3 | chr15 | 25585317 | 25585398 | chr15:25585317:25585398:+:0.68:0.000067 | + |
| Hepg2NucleolusTotalTssHmmV3 | chr15 | 25586964 | 25587162 | chr15:25586964:25587162:+:0.64:0.000001 | + |
| Hepg2NucleusPamTssHmmV2     | chr15 | 25354707 | 25354824 | chr15:25354707:25354824:+:0.69:0.000431 | + |
| Hepg2NucleusPamTssHmmV2     | chr15 | 25356851 | 25356983 | chr15:25356851:25356983:+:0.33:0.000119 | + |
| Hepg2NucleusPamTssHmmV2     | chr15 | 25357813 | 25357822 | chr15:25357813:25357822:+:2.11:0.000002 | + |

|                         |       |          |          |                                         |   |
|-------------------------|-------|----------|----------|-----------------------------------------|---|
| Hepg2NucleusPamTssHmmV2 | chr15 | 25357919 | 25358048 | chr15:25357919:25358048:+:0.04:0.000001 | + |
| Hepg2NucleusPamTssHmmV2 | chr15 | 25358770 | 25358831 | chr15:25358770:25358831:+:1.67:0.000584 | + |
| Hepg2NucleusPamTssHmmV2 | chr15 | 25360797 | 25360855 | chr15:25360797:25360855:+:0.19:0.000011 | + |
| Hepg2NucleusPamTssHmmV2 | chr15 | 25361181 | 25361223 | chr15:25361181:25361223:+:0.07:0.000000 | + |
| Hepg2NucleusPamTssHmmV2 | chr15 | 25361451 | 25361516 | chr15:25361451:25361516:+:0.33:0.000000 | + |
| Hepg2NucleusPamTssHmmV2 | chr15 | 25361757 | 25361893 | chr15:25361757:25361893:+:0.27:0.000000 | + |
| Hepg2NucleusPamTssHmmV2 | chr15 | 25362117 | 25362315 | chr15:25362117:25362315:+:0.26:0.050451 | + |
| Hepg2NucleusPamTssHmmV2 | chr15 | 25362613 | 25362741 | chr15:25362613:25362741:+:0.12:0.001306 | + |
| Hepg2NucleusPamTssHmmV2 | chr15 | 25362893 | 25363061 | chr15:25362893:25363061:+:0.24:0.003903 | + |
| Hepg2NucleusPamTssHmmV2 | chr15 | 25363315 | 25363365 | chr15:25363315:25363365:+:0.03:0.000000 | + |
| Hepg2NucleusPamTssHmmV2 | chr15 | 25364619 | 25364628 | chr15:25364619:25364628:+:1.00:0.000000 | + |
| Hepg2NucleusPamTssHmmV2 | chr15 | 25364742 | 25364802 | chr15:25364742:25364802:+:0.32:0.000004 | + |
| Hepg2NucleusPamTssHmmV2 | chr15 | 25364885 | 25364914 | chr15:25364885:25364914:+:0.15:0.000002 | + |
| Hepg2NucleusPamTssHmmV2 | chr15 | 25365315 | 25365440 | chr15:25365315:25365440:+:0.13:0.000051 | + |
| Hepg2NucleusPamTssHmmV2 | chr15 | 25365521 | 25365568 | chr15:25365521:25365568:+:0.10:0.000000 | + |
| Hepg2NucleusPamTssHmmV2 | chr15 | 25365860 | 25365874 | chr15:25365860:25365874:+:0.85:0.000026 | + |
| Hepg2NucleusPamTssHmmV2 | chr15 | 25365953 | 25365975 | chr15:25365953:25365975:+:1.00:0.000000 | + |
| Hepg2NucleusPamTssHmmV2 | chr15 | 25366007 | 25366010 | chr15:25366007:25366010:+:1.00:0.000000 | + |
| Hepg2NucleusPamTssHmmV2 | chr15 | 25366042 | 25366047 | chr15:25366042:25366047:+:1.00:0.000000 | + |
| Hepg2NucleusPamTssHmmV2 | chr15 | 25366128 | 25366132 | chr15:25366128:25366132:+:0.42:0.000001 | + |
| Hepg2NucleusPamTssHmmV2 | chr15 | 25366382 | 25366389 | chr15:25366382:25366389:+:1.32:0.000254 | + |
| Hepg2NucleusPamTssHmmV2 | chr15 | 25366580 | 25366615 | chr15:25366580:25366615:+:0.05:0.000000 | + |
| Hepg2NucleusPamTssHmmV2 | chr15 | 25366655 | 25366667 | chr15:25366655:25366667:+:0.12:0.000136 | + |
| Hepg2NucleusPamTssHmmV2 | chr15 | 25366699 | 25366717 | chr15:25366699:25366717:+:0.11:0.001013 | + |
| Hepg2NucleusPamTssHmmV2 | chr15 | 25366746 | 25366762 | chr15:25366746:25366762:+:0.62:0.000158 | + |
| Hepg2NucleusPamTssHmmV2 | chr15 | 25366812 | 25366826 | chr15:25366812:25366826:+:0.28:0.000004 | + |
| Hepg2NucleusPamTssHmmV2 | chr15 | 25366881 | 25366884 | chr15:25366881:25366884:+:0.70:0.000000 | + |
| Hepg2NucleusPamTssHmmV2 | chr15 | 25366937 | 25366944 | chr15:25366937:25366944:+:0.19:0.000000 | + |
| Hepg2NucleusPamTssHmmV2 | chr15 | 25366982 | 25366990 | chr15:25366982:25366990:+:0.13:0.000000 | + |
| Hepg2NucleusPamTssHmmV2 | chr15 | 25367033 | 25367041 | chr15:25367033:25367041:+:0.68:0.000000 | + |



|                         |       |          |          |                                         |   |
|-------------------------|-------|----------|----------|-----------------------------------------|---|
| Hepg2NucleusPamTssHmmV2 | chr15 | 25367145 | 25367147 | chr15:25367145:25367147:+:1.43:0.000018 | + |
| Hepg2NucleusPamTssHmmV2 | chr15 | 25367192 | 25367302 | chr15:25367192:25367302:+:0.18:0.000002 | + |
| Hepg2NucleusPamTssHmmV2 | chr15 | 25367376 | 25367411 | chr15:25367376:25367411:+:0.24:0.000007 | + |
| Hepg2NucleusPamTssHmmV2 | chr15 | 25367435 | 25367447 | chr15:25367435:25367447:+:0.40:0.000010 | + |
| Hepg2NucleusPamTssHmmV2 | chr15 | 25367469 | 25367475 | chr15:25367469:25367475:+:0.07:0.000003 | + |
| Hepg2NucleusPamTssHmmV2 | chr15 | 25367516 | 25367520 | chr15:25367516:25367520:+:0.59:0.000002 | + |
| Hepg2NucleusPamTssHmmV2 | chr15 | 25367525 | 25367581 | chr15:25367525:25367581:+:0.51:0.000002 | + |
| Hepg2NucleusPamTssHmmV2 | chr15 | 25368625 | 25368762 | chr15:25368625:25368762:+:0.19:0.000352 | + |
| Hepg2NucleusPamTssHmmV2 | chr15 | 25368810 | 25368847 | chr15:25368810:25368847:+:0.06:0.000000 | + |
| Hepg2NucleusPamTssHmmV2 | chr15 | 25369080 | 25369200 | chr15:25369080:25369200:+:0.77:0.000017 | + |
| Hepg2NucleusPamTssHmmV2 | chr15 | 25369509 | 25369640 | chr15:25369509:25369640:+:0.05:0.000002 | + |
| Hepg2NucleusPamTssHmmV2 | chr15 | 25369893 | 25369915 | chr15:25369893:25369915:+:1.03:0.000002 | + |
| Hepg2NucleusPamTssHmmV2 | chr15 | 25370119 | 25370238 | chr15:25370119:25370238:+:0.18:0.000000 | + |
| Hepg2NucleusPamTssHmmV2 | chr15 | 25370364 | 25370366 | chr15:25370364:25370366:+:3.12:0.000005 | + |
| Hepg2NucleusPamTssHmmV2 | chr15 | 25370424 | 25370516 | chr15:25370424:25370516:+:0.12:0.000004 | + |
| Hepg2NucleusPamTssHmmV2 | chr15 | 25371364 | 25371388 | chr15:25371364:25371388:+:1.27:0.000001 | + |
| Hepg2NucleusPamTssHmmV2 | chr15 | 25372454 | 25372486 | chr15:25372454:25372486:+:0.16:0.000003 | + |
| Hepg2NucleusPamTssHmmV2 | chr15 | 25372573 | 25372585 | chr15:25372573:25372585:+:1.47:0.000000 | + |
| Hepg2NucleusPamTssHmmV2 | chr15 | 25373483 | 25373486 | chr15:25373483:25373486:+:4.30:0.001508 | + |
| Hepg2NucleusPamTssHmmV2 | chr15 | 25373582 | 25373754 | chr15:25373582:25373754:+:0.42:0.001228 | + |
| Hepg2NucleusPamTssHmmV2 | chr15 | 25373992 | 25374007 | chr15:25373992:25374007:+:1.89:0.000000 | + |
| Hepg2NucleusPamTssHmmV2 | chr15 | 25374323 | 25374354 | chr15:25374323:25374354:+:0.44:0.000053 | + |
| Hepg2NucleusPamTssHmmV2 | chr15 | 25374413 | 25374455 | chr15:25374413:25374455:+:0.51:0.000080 | + |
| Hepg2NucleusPamTssHmmV2 | chr15 | 25374516 | 25374675 | chr15:25374516:25374675:+:0.32:0.000040 | + |
| Hepg2NucleusPamTssHmmV2 | chr15 | 25374972 | 25374980 | chr15:25374972:25374980:+:1.46:0.000749 | + |
| Hepg2NucleusPamTssHmmV2 | chr15 | 25375087 | 25375122 | chr15:25375087:25375122:+:0.14:0.002155 | + |
| Hepg2NucleusPamTssHmmV2 | chr15 | 25375432 | 25375461 | chr15:25375432:25375461:+:0.35:0.000044 | + |
| Hepg2NucleusPamTssHmmV2 | chr15 | 25375612 | 25375729 | chr15:25375612:25375729:+:0.02:0.000000 | + |
| Hepg2NucleusPamTssHmmV2 | chr15 | 25375771 | 25375840 | chr15:25375771:25375840:+:0.63:0.000000 | + |
| Hepg2NucleusPamTssHmmV2 | chr15 | 25375992 | 25376113 | chr15:25375992:25376113:+:0.16:0.000000 | + |

|                         |       |          |          |                                         |   |
|-------------------------|-------|----------|----------|-----------------------------------------|---|
| Hepg2NucleusPamTssHmmV2 | chr15 | 25376206 | 25376265 | chr15:25376206:25376265:+:0.40:0.000013 | + |
| Hepg2NucleusPamTssHmmV2 | chr15 | 25376299 | 25376348 | chr15:25376299:25376348:+:0.03:0.000003 | + |
| Hepg2NucleusPamTssHmmV2 | chr15 | 25377027 | 25377118 | chr15:25377027:25377118:+:0.03:0.000000 | + |
| Hepg2NucleusPamTssHmmV2 | chr15 | 25377348 | 25377436 | chr15:25377348:25377436:+:0.58:0.000000 | + |
| Hepg2NucleusPamTssHmmV2 | chr15 | 25377629 | 25377736 | chr15:25377629:25377736:+:1.22:0.000000 | + |
| Hepg2NucleusPamTssHmmV2 | chr15 | 25381056 | 25381198 | chr15:25381056:25381198:+:0.24:0.000000 | + |
| Hepg2NucleusPamTssHmmV2 | chr15 | 25383706 | 25383718 | chr15:25383706:25383718:+:2.28:0.000002 | + |
| Hepg2NucleusPamTssHmmV2 | chr15 | 25383985 | 25384100 | chr15:25383985:25384100:+:0.14:0.000156 | + |
| Hepg2NucleusPamTssHmmV2 | chr15 | 25384414 | 25384553 | chr15:25384414:25384553:+:0.38:0.000141 | + |
| Hepg2NucleusPamTssHmmV2 | chr15 | 25386593 | 25386676 | chr15:25386593:25386676:+:0.08:0.000339 | + |
| Hepg2NucleusPamTssHmmV2 | chr15 | 25386847 | 25387032 | chr15:25386847:25387032:+:0.58:0.000381 | + |
| Hepg2NucleusPamTssHmmV2 | chr15 | 25387885 | 25387951 | chr15:25387885:25387951:+:0.11:0.000055 | + |
| Hepg2NucleusPamTssHmmV2 | chr15 | 25388952 | 25389002 | chr15:25388952:25389002:+:0.71:0.000021 | + |
| Hepg2NucleusPamTssHmmV2 | chr15 | 25389266 | 25389326 | chr15:25389266:25389326:+:0.56:0.012252 | + |
| Hepg2NucleusPamTssHmmV2 | chr15 | 25391302 | 25391365 | chr15:25391302:25391365:+:0.41:0.000008 | + |
| Hepg2NucleusPamTssHmmV2 | chr15 | 25392307 | 25392494 | chr15:25392307:25392494:+:0.11:0.000019 | + |
| Hepg2NucleusPamTssHmmV2 | chr15 | 25395303 | 25395435 | chr15:25395303:25395435:+:0.02:0.000018 | + |
| Hepg2NucleusPamTssHmmV2 | chr15 | 25395877 | 25396061 | chr15:25395877:25396061:+:0.18:0.000008 | + |
| Hepg2NucleusPamTssHmmV2 | chr15 | 25396383 | 25396552 | chr15:25396383:25396552:+:0.49:0.000000 | + |
| Hepg2NucleusPamTssHmmV2 | chr15 | 25397595 | 25397730 | chr15:25397595:25397730:+:0.60:0.006561 | + |
| Hepg2NucleusPamTssHmmV2 | chr15 | 25400951 | 25401103 | chr15:25400951:25401103:+:0.50:0.000009 | + |
| Hepg2NucleusPamTssHmmV2 | chr15 | 25404221 | 25404409 | chr15:25404221:25404409:+:0.28:0.000058 | + |
| Hepg2NucleusPamTssHmmV2 | chr15 | 25404761 | 25404846 | chr15:25404761:25404846:+:1.83:0.001411 | + |
| Hepg2NucleusPamTssHmmV2 | chr15 | 25405658 | 25405820 | chr15:25405658:25405820:+:0.58:0.000131 | + |
| Hepg2NucleusPamTssHmmV2 | chr15 | 25410304 | 25410471 | chr15:25410304:25410471:+:0.65:0.000014 | + |
| Hepg2NucleusPamTssHmmV2 | chr15 | 25415761 | 25415873 | chr15:25415761:25415873:+:0.94:0.861870 | + |
| Hepg2NucleusPamTssHmmV2 | chr15 | 25449912 | 25449914 | chr15:25449912:25449914:+:6.47:0.035408 | + |
| Hepg2NucleusPamTssHmmV2 | chr15 | 25508496 | 25508621 | chr15:25508496:25508621:+:1.98:0.000185 | + |
| Hepg2NucleusPamTssHmmV2 | chr15 | 25555305 | 25555467 | chr15:25555305:25555467:+:0.23:0.000142 | + |
| Hepg2NucleusPamTssHmmV2 | chr15 | 25561281 | 25561421 | chr15:25561281:25561421:+:0.09:0.000055 | + |

|                         |       |          |          |                                         |   |
|-------------------------|-------|----------|----------|-----------------------------------------|---|
| Hepg2NucleusPamTssHmmV2 | chr15 | 25566468 | 25566550 | chr15:25566468:25566550:+:0.20:0.000075 | + |
| Hepg2NucleusPapTssHmm   | chr15 | 25354371 | 25354510 | chr15:25354371:25354510:+:0.05:0.000045 | + |
| Hepg2NucleusPapTssHmm   | chr15 | 25354707 | 25354824 | chr15:25354707:25354824:+:0.69:0.000431 | + |
| Hepg2NucleusPapTssHmm   | chr15 | 25356851 | 25356983 | chr15:25356851:25356983:+:0.33:0.000119 | + |
| Hepg2NucleusPapTssHmm   | chr15 | 25357813 | 25357822 | chr15:25357813:25357822:+:2.11:0.000002 | + |
| Hepg2NucleusPapTssHmm   | chr15 | 25357919 | 25358048 | chr15:25357919:25358048:+:0.04:0.000001 | + |
| Hepg2NucleusPapTssHmm   | chr15 | 25358770 | 25358831 | chr15:25358770:25358831:+:1.67:0.000584 | + |
| Hepg2NucleusPapTssHmm   | chr15 | 25360797 | 25360855 | chr15:25360797:25360855:+:0.19:0.000011 | + |
| Hepg2NucleusPapTssHmm   | chr15 | 25361451 | 25361516 | chr15:25361451:25361516:+:0.33:0.000000 | + |
| Hepg2NucleusPapTssHmm   | chr15 | 25362117 | 25362315 | chr15:25362117:25362315:+:0.26:0.050451 | + |
| Hepg2NucleusPapTssHmm   | chr15 | 25362613 | 25362741 | chr15:25362613:25362741:+:0.12:0.001306 | + |
| Hepg2NucleusPapTssHmm   | chr15 | 25363315 | 25363365 | chr15:25363315:25363365:+:0.03:0.000000 | + |
| Hepg2NucleusPapTssHmm   | chr15 | 25364742 | 25364802 | chr15:25364742:25364802:+:0.32:0.000004 | + |
| Hepg2NucleusPapTssHmm   | chr15 | 25365315 | 25365440 | chr15:25365315:25365440:+:0.13:0.000051 | + |
| Hepg2NucleusPapTssHmm   | chr15 | 25365521 | 25365568 | chr15:25365521:25365568:+:0.10:0.000000 | + |
| Hepg2NucleusPapTssHmm   | chr15 | 25366812 | 25366826 | chr15:25366812:25366826:+:0.28:0.000004 | + |
| Hepg2NucleusPapTssHmm   | chr15 | 25367145 | 25367147 | chr15:25367145:25367147:+:1.43:0.000018 | + |
| Hepg2NucleusPapTssHmm   | chr15 | 25367192 | 25367302 | chr15:25367192:25367302:+:0.18:0.000002 | + |
| Hepg2NucleusPapTssHmm   | chr15 | 25373582 | 25373754 | chr15:25373582:25373754:+:0.42:0.001228 | + |
| Hepg2NucleusPapTssHmm   | chr15 | 25374413 | 25374455 | chr15:25374413:25374455:+:0.51:0.000080 | + |
| Hepg2NucleusPapTssHmm   | chr15 | 25374516 | 25374675 | chr15:25374516:25374675:+:0.32:0.000040 | + |
| Hepg2NucleusPapTssHmm   | chr15 | 25375992 | 25376113 | chr15:25375992:25376113:+:0.16:0.000000 | + |
| Hepg2NucleusPapTssHmm   | chr15 | 25376206 | 25376265 | chr15:25376206:25376265:+:0.40:0.000013 | + |
| Hepg2NucleusPapTssHmm   | chr15 | 25392307 | 25392494 | chr15:25392307:25392494:+:0.11:0.000019 | + |
| Hepg2NucleusPapTssHmm   | chr15 | 25394026 | 25394180 | chr15:25394026:25394180:+:1.01:0.456536 | + |
| Hepg2NucleusPapTssHmm   | chr15 | 25394827 | 25394964 | chr15:25394827:25394964:+:0.66:0.000051 | + |
| Hepg2NucleusPapTssHmm   | chr15 | 25395303 | 25395435 | chr15:25395303:25395435:+:0.02:0.000018 | + |
| Hepg2NucleusPapTssHmm   | chr15 | 25395877 | 25396061 | chr15:25395877:25396061:+:0.18:0.000008 | + |
| Hepg2NucleusPapTssHmm   | chr15 | 25396383 | 25396552 | chr15:25396383:25396552:+:0.49:0.000000 | + |
| Hepg2NucleusPapTssHmm   | chr15 | 25396746 | 25396843 | chr15:25396746:25396843:+:0.54:0.000000 | + |

|                         |       |          |          |                                         |   |
|-------------------------|-------|----------|----------|-----------------------------------------|---|
| Hepg2NucleusPapTssHmm   | chr15 | 25397595 | 25397730 | chr15:25397595:25397730:+:0.60:0.006561 | + |
| Hepg2NucleusPapTssHmm   | chr15 | 25442722 | 25442725 | chr15:25442722:25442725:+:8.53:0.000336 | + |
| Hepg2NucleusPapTssHmm   | chr15 | 25533732 | 25533900 | chr15:25533732:25533900:+:0.08:0.000010 | + |
| Hepg2NucleusPapTssHmm   | chr15 | 25580366 | 25580510 | chr15:25580366:25580510:+:0.07:0.001597 | + |
| HmscucCellPapTssHmm     | chr15 | 25361559 | 25361599 | chr15:25361559:25361599:+:0.000000      | + |
| HobCellPapTssHmm        | chr15 | 25367146 | 25367340 | chr15:25367146:25367340:+:0.000001      | + |
| HuvecCellPapTssHmm      | chr15 | 25356888 | 25357080 | chr15:25356888:25357080:+:0.05:0.004797 | + |
| HuvecCellPapTssHmm      | chr15 | 25357465 | 25357644 | chr15:25357465:25357644:+:0.03:0.000001 | + |
| HuvecCellPapTssHmm      | chr15 | 25357812 | 25358008 | chr15:25357812:25358008:+:0.45:0.000001 | + |
| HuvecCellPapTssHmm      | chr15 | 25360731 | 25360804 | chr15:25360731:25360804:+:0.30:0.710753 | + |
| HuvecCellPapTssHmm      | chr15 | 25362118 | 25362317 | chr15:25362118:25362317:+:0.71:0.015835 | + |
| HuvecCellPapTssHmm      | chr15 | 25364739 | 25364768 | chr15:25364739:25364768:+:0.21:0.000002 | + |
| HuvecCellPapTssHmm      | chr15 | 25364960 | 25365005 | chr15:25364960:25365005:+:0.21:0.000000 | + |
| HuvecCellPapTssHmm      | chr15 | 25365221 | 25365382 | chr15:25365221:25365382:+:0.10:0.000000 | + |
| HuvecCellPapTssHmm      | chr15 | 25367111 | 25367252 | chr15:25367111:25367252:+:0.19:0.000001 | + |
| HuvecCellPapTssHmm      | chr15 | 25584222 | 25584381 | chr15:25584222:25584381:+:1.53:0.000000 | + |
| HuvecCytosolPamTssHmmV2 | chr15 | 25354344 | 25354510 | chr15:25354344:25354510:+:0.54:0.000092 | + |
| HuvecCytosolPamTssHmmV2 | chr15 | 25354697 | 25354863 | chr15:25354697:25354863:+:0.29:0.000055 | + |
| HuvecCytosolPamTssHmmV2 | chr15 | 25357465 | 25357644 | chr15:25357465:25357644:+:0.03:0.000001 | + |
| HuvecCytosolPamTssHmmV2 | chr15 | 25358780 | 25358833 | chr15:25358780:25358833:+:0.97:0.001768 | + |
| HuvecCytosolPamTssHmmV2 | chr15 | 25360012 | 25360113 | chr15:25360012:25360113:+:0.01:0.000434 | + |
| HuvecCytosolPamTssHmmV2 | chr15 | 25361464 | 25361602 | chr15:25361464:25361602:+:0.13:0.000001 | + |
| HuvecCytosolPamTssHmmV2 | chr15 | 25362118 | 25362317 | chr15:25362118:25362317:+:0.71:0.015835 | + |
| HuvecCytosolPamTssHmmV2 | chr15 | 25363349 | 25363365 | chr15:25363349:25363365:+:2.76:0.000000 | + |
| HuvecCytosolPamTssHmmV2 | chr15 | 25364551 | 25364565 | chr15:25364551:25364565:+:1.00:0.000000 | + |
| HuvecCytosolPamTssHmmV2 | chr15 | 25365221 | 25365382 | chr15:25365221:25365382:+:0.10:0.000000 | + |
| HuvecCytosolPamTssHmmV2 | chr15 | 25365865 | 25365875 | chr15:25365865:25365875:+:1.31:0.000040 | + |
| HuvecCytosolPamTssHmmV2 | chr15 | 25367111 | 25367252 | chr15:25367111:25367252:+:0.19:0.000001 | + |
| HuvecCytosolPamTssHmmV2 | chr15 | 25367362 | 25367385 | chr15:25367362:25367385:+:0.88:0.000008 | + |
| HuvecCytosolPamTssHmmV2 | chr15 | 25373728 | 25373812 | chr15:25373728:25373812:+:0.18:0.001365 | + |

|                         |       |          |          |                                         |   |
|-------------------------|-------|----------|----------|-----------------------------------------|---|
| HuvecCytosolPamTssHmmV2 | chr15 | 25376098 | 25376276 | chr15:25376098:25376276:+:0.40:0.000000 | + |
| HuvecCytosolPamTssHmmV2 | chr15 | 25414340 | 25414464 | chr15:25414340:25414464:+:0.15:0.000028 | + |
| HuvecCytosolPamTssHmmV2 | chr15 | 25584222 | 25584381 | chr15:25584222:25584381:+:1.53:0.000000 | + |
| HuvecCytosolPapTssHmm   | chr15 | 25354344 | 25354510 | chr15:25354344:25354510:+:0.54:0.000092 | + |
| HuvecCytosolPapTssHmm   | chr15 | 25354697 | 25354863 | chr15:25354697:25354863:+:0.29:0.000055 | + |
| HuvecCytosolPapTssHmm   | chr15 | 25356888 | 25357080 | chr15:25356888:25357080:+:0.05:0.004797 | + |
| HuvecCytosolPapTssHmm   | chr15 | 25364739 | 25364768 | chr15:25364739:25364768:+:0.21:0.000002 | + |
| HuvecCytosolPapTssHmm   | chr15 | 25364814 | 25364845 | chr15:25364814:25364845:+:0.12:0.000026 | + |
| HuvecCytosolPapTssHmm   | chr15 | 25364960 | 25365005 | chr15:25364960:25365005:+:0.21:0.000000 | + |
| HuvecCytosolPapTssHmm   | chr15 | 25365221 | 25365382 | chr15:25365221:25365382:+:0.10:0.000000 | + |
| HuvecCytosolPapTssHmm   | chr15 | 25365528 | 25365552 | chr15:25365528:25365552:+:0.90:0.000000 | + |
| HuvecCytosolPapTssHmm   | chr15 | 25367111 | 25367252 | chr15:25367111:25367252:+:0.19:0.000001 | + |
| HuvecCytosolPapTssHmm   | chr15 | 25414340 | 25414464 | chr15:25414340:25414464:+:0.15:0.000028 | + |
| HuvecCytosolPapTssHmm   | chr15 | 25584222 | 25584381 | chr15:25584222:25584381:+:1.53:0.000000 | + |
| HuvecNucleusPamTssHmm   | chr15 | 25365865 | 25366047 | chr15:25365865:25366047:+:0.000002      | + |
| HuvecNucleusPapTssHmm   | chr15 | 25354344 | 25354510 | chr15:25354344:25354510:+:0.54:0.000092 | + |
| HuvecNucleusPapTssHmm   | chr15 | 25354697 | 25354863 | chr15:25354697:25354863:+:0.29:0.000055 | + |
| HuvecNucleusPapTssHmm   | chr15 | 25356888 | 25357080 | chr15:25356888:25357080:+:0.05:0.004797 | + |
| HuvecNucleusPapTssHmm   | chr15 | 25357465 | 25357644 | chr15:25357465:25357644:+:0.03:0.000001 | + |
| HuvecNucleusPapTssHmm   | chr15 | 25357812 | 25358008 | chr15:25357812:25358008:+:0.45:0.000001 | + |
| HuvecNucleusPapTssHmm   | chr15 | 25358780 | 25358833 | chr15:25358780:25358833:+:0.97:0.001768 | + |
| HuvecNucleusPapTssHmm   | chr15 | 25358970 | 25359003 | chr15:25358970:25359003:+:1.24:0.003376 | + |
| HuvecNucleusPapTssHmm   | chr15 | 25360012 | 25360113 | chr15:25360012:25360113:+:0.01:0.000434 | + |
| HuvecNucleusPapTssHmm   | chr15 | 25360731 | 25360804 | chr15:25360731:25360804:+:0.30:0.710753 | + |
| HuvecNucleusPapTssHmm   | chr15 | 25361464 | 25361602 | chr15:25361464:25361602:+:0.13:0.000001 | + |
| HuvecNucleusPapTssHmm   | chr15 | 25362118 | 25362317 | chr15:25362118:25362317:+:0.71:0.015835 | + |
| HuvecNucleusPapTssHmm   | chr15 | 25363349 | 25363365 | chr15:25363349:25363365:+:2.76:0.000000 | + |
| HuvecNucleusPapTssHmm   | chr15 | 25364244 | 25364307 | chr15:25364244:25364307:+:0.20:0.003825 | + |
| HuvecNucleusPapTssHmm   | chr15 | 25364377 | 25364419 | chr15:25364377:25364419:+:0.60:0.000046 | + |
| HuvecNucleusPapTssHmm   | chr15 | 25364551 | 25364565 | chr15:25364551:25364565:+:1.00:0.000000 | + |

|                       |       |          |          |                                         |   |
|-----------------------|-------|----------|----------|-----------------------------------------|---|
| HuvecNucleusPapTssHmm | chr15 | 25364739 | 25364768 | chr15:25364739:25364768:+:0.21:0.000002 | + |
| HuvecNucleusPapTssHmm | chr15 | 25364814 | 25364845 | chr15:25364814:25364845:+:0.12:0.000026 | + |
| HuvecNucleusPapTssHmm | chr15 | 25364960 | 25365005 | chr15:25364960:25365005:+:0.21:0.000000 | + |
| HuvecNucleusPapTssHmm | chr15 | 25365143 | 25365154 | chr15:25365143:25365154:+:0.21:0.000001 | + |
| HuvecNucleusPapTssHmm | chr15 | 25365221 | 25365382 | chr15:25365221:25365382:+:0.10:0.000000 | + |
| HuvecNucleusPapTssHmm | chr15 | 25365528 | 25365552 | chr15:25365528:25365552:+:0.90:0.000000 | + |
| HuvecNucleusPapTssHmm | chr15 | 25365865 | 25365875 | chr15:25365865:25365875:+:1.31:0.000040 | + |
| HuvecNucleusPapTssHmm | chr15 | 25367111 | 25367252 | chr15:25367111:25367252:+:0.19:0.000001 | + |
| HuvecNucleusPapTssHmm | chr15 | 25367362 | 25367385 | chr15:25367362:25367385:+:0.88:0.000008 | + |
| HuvecNucleusPapTssHmm | chr15 | 25367517 | 25367592 | chr15:25367517:25367592:+:0.11:0.000001 | + |
| HuvecNucleusPapTssHmm | chr15 | 25370386 | 25370478 | chr15:25370386:25370478:+:0.23:0.000001 | + |
| HuvecNucleusPapTssHmm | chr15 | 25373728 | 25373812 | chr15:25373728:25373812:+:0.18:0.001365 | + |
| HuvecNucleusPapTssHmm | chr15 | 25374114 | 25374212 | chr15:25374114:25374212:+:0.13:0.000125 | + |
| HuvecNucleusPapTssHmm | chr15 | 25374602 | 25374690 | chr15:25374602:25374690:+:0.34:0.001359 | + |
| HuvecNucleusPapTssHmm | chr15 | 25376098 | 25376276 | chr15:25376098:25376276:+:0.40:0.000000 | + |
| Imr90CellPapTssHmm    | chr15 | 25356933 | 25356953 | chr15:25356933:25356953:+:0.000027      | + |
| Imr90CellPapTssHmm    | chr15 | 25362131 | 25362175 | chr15:25362131:25362175:+:0.000095      | + |
| Imr90CellPapTssHmm    | chr15 | 25364408 | 25364417 | chr15:25364408:25364417:+:0.001538      | + |
| Imr90CellPapTssHmm    | chr15 | 25364745 | 25364766 | chr15:25364745:25364766:+:0.000031      | + |
| Imr90CellPapTssHmm    | chr15 | 25365326 | 25365366 | chr15:25365326:25365366:+:0.000003      | + |
| Imr90CellPapTssHmm    | chr15 | 25367232 | 25367234 | chr15:25367232:25367234:+:0.000000      | + |
| Imr90CellPapTssHmm    | chr15 | 25414339 | 25414341 | chr15:25414339:25414341:+:0.000010      | + |
| Imr90CellPapTssHmm    | chr15 | 25584304 | 25584381 | chr15:25584304:25584381:+:0.000010      | + |
| Imr90CellPapTssHmm    | chr15 | 25585230 | 25585270 | chr15:25585230:25585270:+:0.000144      | + |
| Imr90CytosolPapTssHmm | chr15 | 25354765 | 25354824 | chr15:25354765:25354824:+:0.015163      | + |
| Imr90CytosolPapTssHmm | chr15 | 25364408 | 25364417 | chr15:25364408:25364417:+:0.001538      | + |
| Imr90CytosolPapTssHmm | chr15 | 25364745 | 25364766 | chr15:25364745:25364766:+:0.000031      | + |
| Imr90CytosolPapTssHmm | chr15 | 25365326 | 25365366 | chr15:25365326:25365366:+:0.000003      | + |
| Imr90CytosolPapTssHmm | chr15 | 25365526 | 25365531 | chr15:25365526:25365531:+:0.000000      | + |
| Imr90CytosolPapTssHmm | chr15 | 25414339 | 25414341 | chr15:25414339:25414341:+:0.000010      | + |

|                        |       |          |          |                                         |   |
|------------------------|-------|----------|----------|-----------------------------------------|---|
| Imr90CytosolPapTssHmm  | chr15 | 25584304 | 25584381 | chr15:25584304:25584381:+:0.000010      | + |
| Imr90CytosolPapTssHmm  | chr15 | 25585230 | 25585270 | chr15:25585230:25585270:+:0.000144      | + |
| Imr90NucleusPapTssHmm  | chr15 | 25354395 | 25354413 | chr15:25354395:25354413:+:0.000006      | + |
| Imr90NucleusPapTssHmm  | chr15 | 25354765 | 25354824 | chr15:25354765:25354824:+:0.015163      | + |
| Imr90NucleusPapTssHmm  | chr15 | 25358791 | 25358839 | chr15:25358791:25358839:+:0.000015      | + |
| Imr90NucleusPapTssHmm  | chr15 | 25360595 | 25360597 | chr15:25360595:25360597:+:0.000004      | + |
| Imr90NucleusPapTssHmm  | chr15 | 25361559 | 25361563 | chr15:25361559:25361563:+:0.000001      | + |
| Imr90NucleusPapTssHmm  | chr15 | 25361738 | 25361754 | chr15:25361738:25361754:+:0.000000      | + |
| Imr90NucleusPapTssHmm  | chr15 | 25362131 | 25362175 | chr15:25362131:25362175:+:0.000095      | + |
| Imr90NucleusPapTssHmm  | chr15 | 25362198 | 25362207 | chr15:25362198:25362207:+:0.000028      | + |
| Imr90NucleusPapTssHmm  | chr15 | 25362261 | 25362271 | chr15:25362261:25362271:+:0.000000      | + |
| Imr90NucleusPapTssHmm  | chr15 | 25364408 | 25364417 | chr15:25364408:25364417:+:0.001538      | + |
| Imr90NucleusPapTssHmm  | chr15 | 25364745 | 25364766 | chr15:25364745:25364766:+:0.000031      | + |
| Imr90NucleusPapTssHmm  | chr15 | 25365326 | 25365366 | chr15:25365326:25365366:+:0.000003      | + |
| Imr90NucleusPapTssHmm  | chr15 | 25365526 | 25365531 | chr15:25365526:25365531:+:0.000000      | + |
| Imr90NucleusPapTssHmm  | chr15 | 25366813 | 25366819 | chr15:25366813:25366819:+:0.000004      | + |
| Imr90NucleusPapTssHmm  | chr15 | 25367145 | 25367148 | chr15:25367145:25367148:+:0.000000      | + |
| Imr90NucleusPapTssHmm  | chr15 | 25367232 | 25367234 | chr15:25367232:25367234:+:0.000000      | + |
| Imr90NucleusPapTssHmm  | chr15 | 25373243 | 25373264 | chr15:25373243:25373264:+:0.000006      | + |
| Imr90NucleusPapTssHmm  | chr15 | 25414339 | 25414341 | chr15:25414339:25414341:+:0.000010      | + |
| Imr90NucleusPapTssHmm  | chr15 | 25585230 | 25585270 | chr15:25585230:25585270:+:0.000144      | + |
| K562CellPapTssHmm      | chr15 | 25584292 | 25584378 | chr15:25584292:25584378:+:2.20:0.000002 | + |
| Monocd14CellPapTssHmm  | chr15 | 25584145 | 25584323 | chr15:25584145:25584323:+:0.000000      | + |
| NhekCellPapTssHmm      | chr15 | 25357792 | 25357967 | chr15:25357792:25357967:+:0.24:0.000002 | + |
| NhekCellPapTssHmm      | chr15 | 25362084 | 25362239 | chr15:25362084:25362239:+:0.60:0.001612 | + |
| NhekCellPapTssHmm      | chr15 | 25364551 | 25364618 | chr15:25364551:25364618:+:0.28:0.000000 | + |
| NhekCellPapTssHmm      | chr15 | 25365321 | 25365339 | chr15:25365321:25365339:+:0.07:0.000059 | + |
| NhekCellPapTssHmm      | chr15 | 25365511 | 25365556 | chr15:25365511:25365556:+:0.56:0.000003 | + |
| NhekCytosolPamTssHmmV2 | chr15 | 25354342 | 25354519 | chr15:25354342:25354519:+:1.07:0.000061 | + |
| NhekCytosolPamTssHmmV2 | chr15 | 25359087 | 25359217 | chr15:25359087:25359217:+:0.10:0.000003 | + |

|                        |       |          |          |                                         |   |
|------------------------|-------|----------|----------|-----------------------------------------|---|
| NhekCytosolPamTssHmmV2 | chr15 | 25583483 | 25583627 | chr15:25583483:25583627:+:0.12:0.000847 | + |
| NhekCytosolPamTssHmmV2 | chr15 | 25584319 | 25584381 | chr15:25584319:25584381:+:0.68:0.000502 | + |
| NhekCytosolPapTssHmm   | chr15 | 25354342 | 25354519 | chr15:25354342:25354519:+:1.07:0.000061 | + |
| NhekCytosolPapTssHmm   | chr15 | 25364551 | 25364618 | chr15:25364551:25364618:+:0.28:0.000000 | + |
| NhekCytosolPapTssHmm   | chr15 | 25364739 | 25364781 | chr15:25364739:25364781:+:0.18:0.000002 | + |
| NhekCytosolPapTssHmm   | chr15 | 25364964 | 25364978 | chr15:25364964:25364978:+:1.72:0.000000 | + |
| NhekCytosolPapTssHmm   | chr15 | 25365321 | 25365339 | chr15:25365321:25365339:+:0.07:0.000059 | + |
| NhekNucleusPamTssHmmV2 | chr15 | 25354342 | 25354519 | chr15:25354342:25354519:+:1.07:0.000061 | + |
| NhekNucleusPamTssHmmV2 | chr15 | 25354708 | 25354864 | chr15:25354708:25354864:+:0.07:0.000215 | + |
| NhekNucleusPamTssHmmV2 | chr15 | 25356875 | 25357065 | chr15:25356875:25357065:+:0.12:0.011728 | + |
| NhekNucleusPamTssHmmV2 | chr15 | 25357467 | 25357613 | chr15:25357467:25357613:+:0.12:0.000001 | + |
| NhekNucleusPamTssHmmV2 | chr15 | 25357792 | 25357967 | chr15:25357792:25357967:+:0.24:0.000002 | + |
| NhekNucleusPamTssHmmV2 | chr15 | 25359087 | 25359217 | chr15:25359087:25359217:+:0.10:0.000003 | + |
| NhekNucleusPamTssHmmV2 | chr15 | 25360767 | 25360914 | chr15:25360767:25360914:+:0.16:0.004658 | + |
| NhekNucleusPamTssHmmV2 | chr15 | 25361406 | 25361599 | chr15:25361406:25361599:+:0.24:0.000000 | + |
| NhekNucleusPamTssHmmV2 | chr15 | 25362084 | 25362239 | chr15:25362084:25362239:+:0.60:0.001612 | + |
| NhekNucleusPamTssHmmV2 | chr15 | 25363334 | 25363365 | chr15:25363334:25363365:+:0.86:0.000000 | + |
| NhekNucleusPamTssHmmV2 | chr15 | 25364551 | 25364618 | chr15:25364551:25364618:+:0.28:0.000000 | + |
| NhekNucleusPamTssHmmV2 | chr15 | 25364739 | 25364781 | chr15:25364739:25364781:+:0.18:0.000002 | + |
| NhekNucleusPamTssHmmV2 | chr15 | 25364964 | 25364978 | chr15:25364964:25364978:+:1.72:0.000000 | + |
| NhekNucleusPamTssHmmV2 | chr15 | 25365321 | 25365339 | chr15:25365321:25365339:+:0.07:0.000059 | + |
| NhekNucleusPamTssHmmV2 | chr15 | 25365511 | 25365556 | chr15:25365511:25365556:+:0.56:0.000003 | + |
| NhekNucleusPamTssHmmV2 | chr15 | 25366363 | 25366438 | chr15:25366363:25366438:+:0.47:0.000022 | + |
| NhekNucleusPamTssHmmV2 | chr15 | 25367145 | 25367243 | chr15:25367145:25367243:+:0.50:0.000018 | + |
| NhekNucleusPamTssHmmV2 | chr15 | 25370363 | 25370559 | chr15:25370363:25370559:+:0.74:0.000022 | + |
| NhekNucleusPamTssHmmV2 | chr15 | 25374549 | 25374712 | chr15:25374549:25374712:+:0.33:0.004127 | + |
| NhekNucleusPamTssHmmV2 | chr15 | 25376098 | 25376286 | chr15:25376098:25376286:+:1.68:0.000000 | + |
| NhekNucleusPamTssHmmV2 | chr15 | 25583483 | 25583627 | chr15:25583483:25583627:+:0.12:0.000847 | + |
| NhekNucleusPamTssHmmV2 | chr15 | 25584319 | 25584381 | chr15:25584319:25584381:+:0.68:0.000502 | + |
| NhekNucleusPapTssHmmV2 | chr15 | 25354342 | 25354519 | chr15:25354342:25354519:+:1.07:0.000061 | + |



|                        |       |          |          |                                         |   |
|------------------------|-------|----------|----------|-----------------------------------------|---|
| NhekNucleusPapTssHmmV2 | chr15 | 25354708 | 25354864 | chr15:25354708:25354864:+:0.07:0.000215 | + |
| NhekNucleusPapTssHmmV2 | chr15 | 25356875 | 25357065 | chr15:25356875:25357065:+:0.12:0.011728 | + |
| NhekNucleusPapTssHmmV2 | chr15 | 25357467 | 25357613 | chr15:25357467:25357613:+:0.12:0.000001 | + |
| NhekNucleusPapTssHmmV2 | chr15 | 25357792 | 25357967 | chr15:25357792:25357967:+:0.24:0.000002 | + |
| NhekNucleusPapTssHmmV2 | chr15 | 25359087 | 25359217 | chr15:25359087:25359217:+:0.10:0.000003 | + |
| NhekNucleusPapTssHmmV2 | chr15 | 25360767 | 25360914 | chr15:25360767:25360914:+:0.16:0.004658 | + |
| NhekNucleusPapTssHmmV2 | chr15 | 25361406 | 25361599 | chr15:25361406:25361599:+:0.24:0.000000 | + |
| NhekNucleusPapTssHmmV2 | chr15 | 25362084 | 25362239 | chr15:25362084:25362239:+:0.60:0.001612 | + |
| NhekNucleusPapTssHmmV2 | chr15 | 25363334 | 25363365 | chr15:25363334:25363365:+:0.86:0.000000 | + |
| NhekNucleusPapTssHmmV2 | chr15 | 25364551 | 25364618 | chr15:25364551:25364618:+:0.28:0.000000 | + |
| NhekNucleusPapTssHmmV2 | chr15 | 25364739 | 25364781 | chr15:25364739:25364781:+:0.18:0.000002 | + |
| NhekNucleusPapTssHmmV2 | chr15 | 25364964 | 25364978 | chr15:25364964:25364978:+:1.72:0.000000 | + |
| NhekNucleusPapTssHmmV2 | chr15 | 25365210 | 25365259 | chr15:25365210:25365259:+:0.07:0.000001 | + |
| NhekNucleusPapTssHmmV2 | chr15 | 25365321 | 25365339 | chr15:25365321:25365339:+:0.07:0.000059 | + |
| NhekNucleusPapTssHmmV2 | chr15 | 25365511 | 25365556 | chr15:25365511:25365556:+:0.56:0.000003 | + |
| NhekNucleusPapTssHmmV2 | chr15 | 25366363 | 25366438 | chr15:25366363:25366438:+:0.47:0.000022 | + |
| NhekNucleusPapTssHmmV2 | chr15 | 25367145 | 25367243 | chr15:25367145:25367243:+:0.50:0.000018 | + |
| NhekNucleusPapTssHmmV2 | chr15 | 25370363 | 25370559 | chr15:25370363:25370559:+:0.74:0.000022 | + |
| NhekNucleusPapTssHmmV2 | chr15 | 25374549 | 25374712 | chr15:25374549:25374712:+:0.33:0.004127 | + |
| NhekNucleusPapTssHmmV2 | chr15 | 25376098 | 25376286 | chr15:25376098:25376286:+:1.68:0.000000 | + |
| NhekNucleusPapTssHmmV2 | chr15 | 25414258 | 25414415 | chr15:25414258:25414415:+:0.45:0.000004 | + |
| NhekNucleusPapTssHmmV2 | chr15 | 25583483 | 25583627 | chr15:25583483:25583627:+:0.12:0.000847 | + |
| NhekNucleusPapTssHmmV2 | chr15 | 25584319 | 25584381 | chr15:25584319:25584381:+:0.68:0.000502 | + |
| NhekNucleusPapTssHmmV3 | chr15 | 25365327 | 25365338 | chr15:25365327:25365338:+:0.000000      | + |
| Nhemm2CellPapTssHmm    | chr15 | 25365326 | 25365338 | chr15:25365326:25365338:+:0.000002      | + |
| SkmcCellPapTssHmm      | chr15 | 25365328 | 25365383 | chr15:25365328:25365383:+:0.000000      | + |
| SknshCellPapTssHmm     | chr15 | 25360594 | 25360597 | chr15:25360594:25360597:+:0.000004      | + |
| SknshCellPapTssHmm     | chr15 | 25361558 | 25361562 | chr15:25361558:25361562:+:0.000001      | + |
| SknshCellPapTssHmm     | chr15 | 25362120 | 25362271 | chr15:25362120:25362271:+:0.000000      | + |
| SknshCellPapTssHmm     | chr15 | 25364742 | 25364766 | chr15:25364742:25364766:+:0.000016      | + |

|                       |       |          |          |                                    |   |
|-----------------------|-------|----------|----------|------------------------------------|---|
| SknshCellPapTssHmm    | chr15 | 25365054 | 25365058 | chr15:25365054:25365058:+:0.000000 | + |
| SknshCellPapTssHmm    | chr15 | 25365326 | 25365338 | chr15:25365326:25365338:+:0.000012 | + |
| SknshCellPapTssHmm    | chr15 | 25365362 | 25365365 | chr15:25365362:25365365:+:0.000001 | + |
| SknshCellPapTssHmm    | chr15 | 25365865 | 25365869 | chr15:25365865:25365869:+:0.000001 | + |
| SknshCellPapTssHmm    | chr15 | 25365910 | 25365917 | chr15:25365910:25365917:+:0.000000 | + |
| SknshCellPapTssHmm    | chr15 | 25365962 | 25365976 | chr15:25365962:25365976:+:0.000000 | + |
| SknshCellPapTssHmm    | chr15 | 25366423 | 25366438 | chr15:25366423:25366438:+:0.000015 | + |
| SknshCellPapTssHmm    | chr15 | 25366813 | 25366819 | chr15:25366813:25366819:+:0.000007 | + |
| SknshCellPapTssHmm    | chr15 | 25367140 | 25367248 | chr15:25367140:25367248:+:0.000000 | + |
| SknshCellPapTssHmm    | chr15 | 25582948 | 25582959 | chr15:25582948:25582959:+:0.000015 | + |
| SknshCytosolPapTssHmm | chr15 | 25364742 | 25364766 | chr15:25364742:25364766:+:0.000016 | + |
| SknshCytosolPapTssHmm | chr15 | 25365326 | 25365338 | chr15:25365326:25365338:+:0.000012 | + |
| SknshCytosolPapTssHmm | chr15 | 25365865 | 25365869 | chr15:25365865:25365869:+:0.000001 | + |
| SknshCytosolPapTssHmm | chr15 | 25367140 | 25367248 | chr15:25367140:25367248:+:0.000000 | + |
| SknshCytosolPapTssHmm | chr15 | 25583510 | 25583571 | chr15:25583510:25583571:+:0.000000 | + |
| SknshNucleusPapTssHmm | chr15 | 25354768 | 25354771 | chr15:25354768:25354771:+:0.002045 | + |
| SknshNucleusPapTssHmm | chr15 | 25360594 | 25360597 | chr15:25360594:25360597:+:0.000004 | + |
| SknshNucleusPapTssHmm | chr15 | 25360766 | 25360804 | chr15:25360766:25360804:+:0.003970 | + |
| SknshNucleusPapTssHmm | chr15 | 25361262 | 25361279 | chr15:25361262:25361279:+:0.000000 | + |
| SknshNucleusPapTssHmm | chr15 | 25361558 | 25361562 | chr15:25361558:25361562:+:0.000001 | + |
| SknshNucleusPapTssHmm | chr15 | 25361738 | 25361754 | chr15:25361738:25361754:+:0.000000 | + |
| SknshNucleusPapTssHmm | chr15 | 25361799 | 25361804 | chr15:25361799:25361804:+:0.000000 | + |
| SknshNucleusPapTssHmm | chr15 | 25361977 | 25361979 | chr15:25361977:25361979:+:0.000029 | + |
| SknshNucleusPapTssHmm | chr15 | 25362052 | 25362059 | chr15:25362052:25362059:+:0.000034 | + |
| SknshNucleusPapTssHmm | chr15 | 25362120 | 25362271 | chr15:25362120:25362271:+:0.000000 | + |
| SknshNucleusPapTssHmm | chr15 | 25364742 | 25364766 | chr15:25364742:25364766:+:0.000016 | + |
| SknshNucleusPapTssHmm | chr15 | 25365054 | 25365058 | chr15:25365054:25365058:+:0.000000 | + |
| SknshNucleusPapTssHmm | chr15 | 25365143 | 25365145 | chr15:25365143:25365145:+:0.000000 | + |
| SknshNucleusPapTssHmm | chr15 | 25365176 | 25365178 | chr15:25365176:25365178:+:0.000000 | + |
| SknshNucleusPapTssHmm | chr15 | 25365326 | 25365338 | chr15:25365326:25365338:+:0.000012 | + |

|                       |       |          |          |                                         |   |
|-----------------------|-------|----------|----------|-----------------------------------------|---|
| SknshNucleusPapTssHmm | chr15 | 25365362 | 25365365 | chr15:25365362:25365365:+:0.000001      | + |
| SknshNucleusPapTssHmm | chr15 | 25365380 | 25365383 | chr15:25365380:25365383:+:0.000002      | + |
| SknshNucleusPapTssHmm | chr15 | 25365865 | 25365869 | chr15:25365865:25365869:+:0.000001      | + |
| SknshNucleusPapTssHmm | chr15 | 25365910 | 25365917 | chr15:25365910:25365917:+:0.000000      | + |
| SknshNucleusPapTssHmm | chr15 | 25365962 | 25365976 | chr15:25365962:25365976:+:0.000000      | + |
| SknshNucleusPapTssHmm | chr15 | 25366043 | 25366049 | chr15:25366043:25366049:+:0.000000      | + |
| SknshNucleusPapTssHmm | chr15 | 25366423 | 25366438 | chr15:25366423:25366438:+:0.000015      | + |
| SknshNucleusPapTssHmm | chr15 | 25366654 | 25366659 | chr15:25366654:25366659:+:0.000002      | + |
| SknshNucleusPapTssHmm | chr15 | 25366813 | 25366819 | chr15:25366813:25366819:+:0.000007      | + |
| SknshNucleusPapTssHmm | chr15 | 25366984 | 25366986 | chr15:25366984:25366986:+:0.000000      | + |
| SknshNucleusPapTssHmm | chr15 | 25367094 | 25367098 | chr15:25367094:25367098:+:0.000000      | + |
| SknshNucleusPapTssHmm | chr15 | 25367113 | 25367116 | chr15:25367113:25367116:+:0.000000      | + |
| SknshNucleusPapTssHmm | chr15 | 25367140 | 25367248 | chr15:25367140:25367248:+:0.000000      | + |
| SknshNucleusPapTssHmm | chr15 | 25367363 | 25367381 | chr15:25367363:25367381:+:0.000000      | + |
| SknshNucleusPapTssHmm | chr15 | 25369912 | 25369951 | chr15:25369912:25369951:+:0.000003      | + |
| SknshNucleusPapTssHmm | chr15 | 25370345 | 25370373 | chr15:25370345:25370373:+:0.000000      | + |
| SknshNucleusPapTssHmm | chr15 | 25370680 | 25370685 | chr15:25370680:25370685:+:0.000000      | + |
| SknshNucleusPapTssHmm | chr15 | 25370752 | 25370756 | chr15:25370752:25370756:+:0.000000      | + |
| SknshNucleusPapTssHmm | chr15 | 25371008 | 25371047 | chr15:25371008:25371047:+:0.000000      | + |
| SknshNucleusPapTssHmm | chr15 | 25373748 | 25373812 | chr15:25373748:25373812:+:0.018829      | + |
| SknshNucleusPapTssHmm | chr15 | 25374351 | 25374360 | chr15:25374351:25374360:+:0.000007      | + |
| SknshNucleusPapTssHmm | chr15 | 25374648 | 25374674 | chr15:25374648:25374674:+:0.000000      | + |
| SknshNucleusPapTssHmm | chr15 | 25375090 | 25375092 | chr15:25375090:25375092:+:0.000083      | + |
| SknshNucleusPapTssHmm | chr15 | 25390055 | 25390059 | chr15:25390055:25390059:+:0.000003      | + |
| SknshNucleusPapTssHmm | chr15 | 25582948 | 25582959 | chr15:25582948:25582959:+:0.000015      | + |
| SknshNucleusPapTssHmm | chr15 | 25583510 | 25583571 | chr15:25583510:25583571:+:0.000000      | + |
| SknshraCellPapTssHmm  | chr15 | 25357891 | 25357997 | chr15:25357891:25357997:+:0.38:0.000000 | + |

**Table S3. Transcription start site (TSS) tags mapping to U-UBE3A-ATS transcript in *cis*-antisense orientation**

| <b>cell line/cellular compartments</b> | <b>Chr</b> | <b>start</b> | <b>stop</b> | <b>Name</b>                        | <b>Orientation</b> |
|----------------------------------------|------------|--------------|-------------|------------------------------------|--------------------|
| A549CytosolPapTssHmm                   | chr15      | 25414365     | 25414566    | chr15:25414365:25414566:-:0.000136 | -                  |
| A549CytosolPapTssHmm                   | chr15      | 25507642     | 25507649    | chr15:25507642:25507649:-:0.000000 | -                  |
| A549CytosolPapTssHmm                   | chr15      | 25550015     | 25550018    | chr15:25550015:25550018:-:0.000000 | -                  |
| A549CytosolPapTssHmm                   | chr15      | 25582419     | 25582423    | chr15:25582419:25582423:-:0.000008 | -                  |
| A549CytosolPapTssHmm                   | chr15      | 25582742     | 25582746    | chr15:25582742:25582746:-:0.000000 | -                  |
| A549CytosolPapTssHmm                   | chr15      | 25583007     | 25583014    | chr15:25583007:25583014:-:0.000000 | -                  |
| A549CytosolPapTssHmm                   | chr15      | 25583447     | 25583449    | chr15:25583447:25583449:-:0.000000 | -                  |
| A549CytosolPapTssHmm                   | chr15      | 25583491     | 25583499    | chr15:25583491:25583499:-:0.000000 | -                  |
| A549CytosolPapTssHmm                   | chr15      | 25583788     | 25583798    | chr15:25583788:25583798:-:0.000004 | -                  |
| A549CytosolPapTssHmm                   | chr15      | 25583986     | 25583990    | chr15:25583986:25583990:-:0.000000 | -                  |
| A549CytosolPapTssHmm                   | chr15      | 25584093     | 25584211    | chr15:25584093:25584211:-:0.000000 | -                  |
| A549CytosolPapTssHmm                   | chr15      | 25584317     | 25584321    | chr15:25584317:25584321:-:0.000000 | -                  |
| A549CytosolPapTssHmm                   | chr15      | 25584403     | 25584405    | chr15:25584403:25584405:-:0.000000 | -                  |
| A549CytosolPapTssHmm                   | chr15      | 25585270     | 25585379    | chr15:25585270:25585379:-:0.000000 | -                  |
| A549NucleusPapTssHmm                   | chr15      | 25414365     | 25414566    | chr15:25414365:25414566:-:0.000136 | -                  |
| A549NucleusPapTssHmm                   | chr15      | 25507642     | 25507649    | chr15:25507642:25507649:-:0.000000 | -                  |
| A549NucleusPapTssHmm                   | chr15      | 25550015     | 25550018    | chr15:25550015:25550018:-:0.000000 | -                  |
| A549NucleusPapTssHmm                   | chr15      | 25564391     | 25564496    | chr15:25564391:25564496:-:0.000000 | -                  |
| A549NucleusPapTssHmm                   | chr15      | 25572332     | 25572490    | chr15:25572332:25572490:-:0.000198 | -                  |
| A549NucleusPapTssHmm                   | chr15      | 25579030     | 25579039    | chr15:25579030:25579039:-:0.000000 | -                  |
| A549NucleusPapTssHmm                   | chr15      | 25582419     | 25582423    | chr15:25582419:25582423:-:0.000008 | -                  |
| A549NucleusPapTssHmm                   | chr15      | 25582742     | 25582746    | chr15:25582742:25582746:-:0.000000 | -                  |
| A549NucleusPapTssHmm                   | chr15      | 25583447     | 25583449    | chr15:25583447:25583449:-:0.000000 | -                  |
| A549NucleusPapTssHmm                   | chr15      | 25583491     | 25583499    | chr15:25583491:25583499:-:0.000000 | -                  |
| A549NucleusPapTssHmm                   | chr15      | 25583788     | 25583798    | chr15:25583788:25583798:-:0.000004 | -                  |
| A549NucleusPapTssHmm                   | chr15      | 25583986     | 25583990    | chr15:25583986:25583990:-:0.000000 | -                  |
| A549NucleusPapTssHmm                   | chr15      | 25584093     | 25584211    | chr15:25584093:25584211:-:0.000000 | -                  |

|                            |       |          |          |                                         |   |
|----------------------------|-------|----------|----------|-----------------------------------------|---|
| A549NucleusPapTssHmm       | chr15 | 25584317 | 25584321 | chr15:25584317:25584321:-:0.000000      | - |
| A549NucleusPapTssHmm       | chr15 | 25584403 | 25584405 | chr15:25584403:25584405:-:0.000000      | - |
| A549NucleusPapTssHmm       | chr15 | 25585270 | 25585379 | chr15:25585270:25585379:-:0.000000      | - |
| A549NucleusPapTssHmm       | chr15 | 25587934 | 25587953 | chr15:25587934:25587953:-:0.000234      | - |
| Ag04450CellPapTssHmm       | chr15 | 25578923 | 25579039 | chr15:25578923:25579039:-:0.48:0.000000 | - |
| Ag04450CellPapTssHmm       | chr15 | 25582743 | 25582748 | chr15:25582743:25582748:-:3.97:0.000006 | - |
| Ag04450CellPapTssHmm       | chr15 | 25583988 | 25583999 | chr15:25583988:25583999:-:1.72:0.000003 | - |
| Ag04450CellPapTssHmm       | chr15 | 25584093 | 25584255 | chr15:25584093:25584255:-:0.64:0.000000 | - |
| Ag04450CellPapTssHmm       | chr15 | 25584312 | 25584405 | chr15:25584312:25584405:-:0.05:0.000015 | - |
| Ag04450CellPapTssHmm       | chr15 | 25585266 | 25585378 | chr15:25585266:25585378:-:1.13:0.000062 | - |
| BjCellPapTssHmm            | chr15 | 25583790 | 25583888 | chr15:25583790:25583888:-:0.23:0.000021 | - |
| BjCellPapTssHmm            | chr15 | 25584095 | 25584254 | chr15:25584095:25584254:-:0.82:0.000000 | - |
| BjCellPapTssHmm            | chr15 | 25585266 | 25585377 | chr15:25585266:25585377:-:0.76:0.000103 | - |
| Cd20CellPapTssHmm          | chr15 | 25507642 | 25507649 | chr15:25507642:25507649:-:0.000000      | - |
| Cd20CellPapTssHmm          | chr15 | 25550015 | 25550018 | chr15:25550015:25550018:-:0.000001      | - |
| Cd20CellPapTssHmm          | chr15 | 25582740 | 25582777 | chr15:25582740:25582777:-:0.000000      | - |
| Cd20CellPapTssHmm          | chr15 | 25583446 | 25583501 | chr15:25583446:25583501:-:0.000042      | - |
| Cd20CellPapTssHmm          | chr15 | 25583790 | 25583795 | chr15:25583790:25583795:-:0.000003      | - |
| Cd20CellPapTssHmm          | chr15 | 25583987 | 25583997 | chr15:25583987:25583997:-:0.000001      | - |
| Cd20CellPapTssHmm          | chr15 | 25584104 | 25584106 | chr15:25584104:25584106:-:0.000000      | - |
| Cd20CellPapTssHmm          | chr15 | 25584161 | 25584163 | chr15:25584161:25584163:-:0.000001      | - |
| Cd20CellPapTssHmm          | chr15 | 25584186 | 25584188 | chr15:25584186:25584188:-:0.000007      | - |
| Cd20CellPapTssHmm          | chr15 | 25584246 | 25584251 | chr15:25584246:25584251:-:0.000292      | - |
| Cd20CellPapTssHmm          | chr15 | 25584291 | 25584293 | chr15:25584291:25584293:-:0.000004      | - |
| Cd20CellPapTssHmm          | chr15 | 25585280 | 25585378 | chr15:25585280:25585378:-:0.000046      | - |
| Cd34mobilizedCellPapTssHmm | chr15 | 25414365 | 25414566 | chr15:25414365:25414566:-:0.000012      | - |
| Cd34mobilizedCellPapTssHmm | chr15 | 25582421 | 25582423 | chr15:25582421:25582423:-:0.000012      | - |
| Cd34mobilizedCellPapTssHmm | chr15 | 25583988 | 25583993 | chr15:25583988:25583993:-:0.000000      | - |
| Cd34mobilizedCellPapTssHmm | chr15 | 25584094 | 25584209 | chr15:25584094:25584209:-:0.000115      | - |
| Cd34mobilizedCellPapTssHmm | chr15 | 25585266 | 25585374 | chr15:25585266:25585374:-:0.000006      | - |

|                           |       |          |          |                                         |   |
|---------------------------|-------|----------|----------|-----------------------------------------|---|
| Gm12878CellPapTssHmm      | chr15 | 25550016 | 25550091 | chr15:25550016:25550091:-:2.09:0.000006 | - |
| Gm12878CellPapTssHmm      | chr15 | 25565957 | 25566014 | chr15:25565957:25566014:-:0.19:0.001873 | - |
| Gm12878CellPapTssHmm      | chr15 | 25578215 | 25578411 | chr15:25578215:25578411:-:0.45:0.000023 | - |
| Gm12878CellPapTssHmm      | chr15 | 25579033 | 25579040 | chr15:25579033:25579040:-:2.32:0.000000 | - |
| Gm12878CellPapTssHmm      | chr15 | 25579547 | 25579578 | chr15:25579547:25579578:-:0.07:0.000002 | - |
| Gm12878CellPapTssHmm      | chr15 | 25579778 | 25579788 | chr15:25579778:25579788:-:0.81:0.000001 | - |
| Gm12878CellPapTssHmm      | chr15 | 25582419 | 25582446 | chr15:25582419:25582446:-:0.83:0.000225 | - |
| Gm12878CellPapTssHmm      | chr15 | 25582723 | 25582874 | chr15:25582723:25582874:-:0.18:0.000003 | - |
| Gm12878CellPapTssHmm      | chr15 | 25582973 | 25582989 | chr15:25582973:25582989:-:0.42:0.000000 | - |
| Gm12878CellPapTssHmm      | chr15 | 25583351 | 25583357 | chr15:25583351:25583357:-:0.64:0.000006 | - |
| Gm12878CellPapTssHmm      | chr15 | 25583442 | 25583503 | chr15:25583442:25583503:-:0.87:0.000084 | - |
| Gm12878CellPapTssHmm      | chr15 | 25583785 | 25583804 | chr15:25583785:25583804:-:0.94:0.000031 | - |
| Gm12878CellPapTssHmm      | chr15 | 25583988 | 25583995 | chr15:25583988:25583995:-:0.93:0.000001 | - |
| Gm12878CellPapTssHmm      | chr15 | 25584026 | 25584209 | chr15:25584026:25584209:-:0.43:0.000000 | - |
| Gm12878CellPapTssHmm      | chr15 | 25584246 | 25584253 | chr15:25584246:25584253:-:1.26:0.000000 | - |
| Gm12878CellPapTssHmm      | chr15 | 25584291 | 25584337 | chr15:25584291:25584337:-:0.26:0.000030 | - |
| Gm12878CellPapTssHmm      | chr15 | 25584403 | 25584406 | chr15:25584403:25584406:-:2.89:0.000012 | - |
| Gm12878CellPapTssHmm      | chr15 | 25585230 | 25585377 | chr15:25585230:25585377:-:0.43:0.000103 | - |
| Gm12878CellPapTssHmm      | chr15 | 25590133 | 25590192 | chr15:25590133:25590192:-:0.39:0.000001 | - |
| Gm12878CytosolPamTssHmm   | chr15 | 25565957 | 25566014 | chr15:25565957:25566014:-:0.19:0.001873 | - |
| Gm12878CytosolPamTssHmm   | chr15 | 25568528 | 25568710 | chr15:25568528:25568710:-:0.86:0.021117 | - |
| Gm12878CytosolPamTssHmm   | chr15 | 25572221 | 25572388 | chr15:25572221:25572388:-:1.17:0.000243 | - |
| Gm12878CytosolPamTssHmm   | chr15 | 25579383 | 25579393 | chr15:25579383:25579393:-:1.96:0.000000 | - |
| Gm12878CytosolPamTssHmm   | chr15 | 25582723 | 25582874 | chr15:25582723:25582874:-:0.18:0.000003 | - |
| Gm12878CytosolPamTssHmm   | chr15 | 25583785 | 25583804 | chr15:25583785:25583804:-:0.94:0.000031 | - |
| Gm12878CytosolPamTssHmm   | chr15 | 25584026 | 25584209 | chr15:25584026:25584209:-:0.43:0.000000 | - |
| Gm12878CytosolPamTssHmm   | chr15 | 25587703 | 25587715 | chr15:25587703:25587715:-:0.14:0.000007 | - |
| Gm12878CytosolPamTssHmm   | chr15 | 25588545 | 25588618 | chr15:25588545:25588618:-:0.27:0.000001 | - |
| Gm12878CytosolPamTssHmm   | chr15 | 25590442 | 25590553 | chr15:25590442:25590553:-:0.18:0.000198 | - |
| Gm12878CytosolPamTssHmmV2 | chr15 | 25565957 | 25566014 | chr15:25565957:25566014:-:0.19:0.001873 | - |

|                               |       |          |          |                                         |   |
|-------------------------------|-------|----------|----------|-----------------------------------------|---|
| Gm12878CytosolPamTssHmmV2     | chr15 | 25568528 | 25568710 | chr15:25568528:25568710:-:0.86:0.021117 | - |
| Gm12878CytosolPamTssHmmV2     | chr15 | 25572221 | 25572388 | chr15:25572221:25572388:-:1.17:0.000243 | - |
| Gm12878CytosolPamTssHmmV2     | chr15 | 25579383 | 25579393 | chr15:25579383:25579393:-:1.96:0.000000 | - |
| Gm12878CytosolPamTssHmmV2     | chr15 | 25582723 | 25582874 | chr15:25582723:25582874:-:0.18:0.000003 | - |
| Gm12878CytosolPamTssHmmV2     | chr15 | 25583785 | 25583804 | chr15:25583785:25583804:-:0.94:0.000031 | - |
| Gm12878CytosolPamTssHmmV2     | chr15 | 25584026 | 25584209 | chr15:25584026:25584209:-:0.43:0.000000 | - |
| Gm12878CytosolPamTssHmmV2     | chr15 | 25587703 | 25587715 | chr15:25587703:25587715:-:0.14:0.000007 | - |
| Gm12878CytosolPamTssHmmV2     | chr15 | 25588545 | 25588618 | chr15:25588545:25588618:-:0.27:0.000001 | - |
| Gm12878CytosolPamTssHmmV2     | chr15 | 25590442 | 25590553 | chr15:25590442:25590553:-:0.18:0.000198 | - |
| Gm12878CytosolPapTssHmm       | chr15 | 25550016 | 25550091 | chr15:25550016:25550091:-:2.09:0.000006 | - |
| Gm12878CytosolPapTssHmm       | chr15 | 25579033 | 25579040 | chr15:25579033:25579040:-:2.32:0.000000 | - |
| Gm12878CytosolPapTssHmm       | chr15 | 25579547 | 25579578 | chr15:25579547:25579578:-:0.07:0.000002 | - |
| Gm12878CytosolPapTssHmm       | chr15 | 25579778 | 25579788 | chr15:25579778:25579788:-:0.81:0.000001 | - |
| Gm12878CytosolPapTssHmm       | chr15 | 25581024 | 25581048 | chr15:25581024:25581048:-:1.18:0.000146 | - |
| Gm12878CytosolPapTssHmm       | chr15 | 25582723 | 25582874 | chr15:25582723:25582874:-:0.18:0.000003 | - |
| Gm12878CytosolPapTssHmm       | chr15 | 25583442 | 25583503 | chr15:25583442:25583503:-:0.87:0.000084 | - |
| Gm12878CytosolPapTssHmm       | chr15 | 25583785 | 25583804 | chr15:25583785:25583804:-:0.94:0.000031 | - |
| Gm12878CytosolPapTssHmm       | chr15 | 25583988 | 25583995 | chr15:25583988:25583995:-:0.93:0.000001 | - |
| Gm12878CytosolPapTssHmm       | chr15 | 25584026 | 25584209 | chr15:25584026:25584209:-:0.43:0.000000 | - |
| Gm12878CytosolPapTssHmm       | chr15 | 25584291 | 25584337 | chr15:25584291:25584337:-:0.26:0.000030 | - |
| Gm12878CytosolPapTssHmm       | chr15 | 25584403 | 25584406 | chr15:25584403:25584406:-:2.89:0.000012 | - |
| Gm12878CytosolPapTssHmm       | chr15 | 25585230 | 25585377 | chr15:25585230:25585377:-:0.43:0.000103 | - |
| Gm12878NucleolusTotalTssHmmV2 | chr15 | 25564396 | 25564558 | chr15:25564396:25564558:-:0.37:0.000042 | - |
| Gm12878NucleolusTotalTssHmmV2 | chr15 | 25565957 | 25566014 | chr15:25565957:25566014:-:0.19:0.001873 | - |
| Gm12878NucleolusTotalTssHmmV2 | chr15 | 25568528 | 25568710 | chr15:25568528:25568710:-:0.86:0.021117 | - |
| Gm12878NucleolusTotalTssHmmV2 | chr15 | 25572221 | 25572388 | chr15:25572221:25572388:-:1.17:0.000243 | - |
| Gm12878NucleolusTotalTssHmmV2 | chr15 | 25577708 | 25577710 | chr15:25577708:25577710:-:5.03:0.000219 | - |
| Gm12878NucleolusTotalTssHmmV2 | chr15 | 25578215 | 25578411 | chr15:25578215:25578411:-:0.45:0.000023 | - |
| Gm12878NucleolusTotalTssHmmV2 | chr15 | 25578552 | 25578696 | chr15:25578552:25578696:-:0.14:0.000271 | - |
| Gm12878NucleolusTotalTssHmmV2 | chr15 | 25579383 | 25579393 | chr15:25579383:25579393:-:1.96:0.000000 | - |

|                               |       |          |          |                                         |   |
|-------------------------------|-------|----------|----------|-----------------------------------------|---|
| Gm12878NucleolusTotalTssHmmV2 | chr15 | 25579547 | 25579578 | chr15:25579547:25579578:-:0.07:0.000002 | - |
| Gm12878NucleolusTotalTssHmmV2 | chr15 | 25579778 | 25579788 | chr15:25579778:25579788:-:0.81:0.000001 | - |
| Gm12878NucleolusTotalTssHmmV2 | chr15 | 25581024 | 25581048 | chr15:25581024:25581048:-:1.18:0.000146 | - |
| Gm12878NucleolusTotalTssHmmV2 | chr15 | 25582419 | 25582446 | chr15:25582419:25582446:-:0.83:0.000225 | - |
| Gm12878NucleolusTotalTssHmmV2 | chr15 | 25582723 | 25582874 | chr15:25582723:25582874:-:0.18:0.000003 | - |
| Gm12878NucleolusTotalTssHmmV2 | chr15 | 25582973 | 25582989 | chr15:25582973:25582989:-:0.42:0.000000 | - |
| Gm12878NucleolusTotalTssHmmV2 | chr15 | 25583442 | 25583503 | chr15:25583442:25583503:-:0.87:0.000084 | - |
| Gm12878NucleolusTotalTssHmmV2 | chr15 | 25583785 | 25583804 | chr15:25583785:25583804:-:0.94:0.000031 | - |
| Gm12878NucleolusTotalTssHmmV2 | chr15 | 25583844 | 25583849 | chr15:25583844:25583849:-:0.94:0.000003 | - |
| Gm12878NucleolusTotalTssHmmV2 | chr15 | 25583988 | 25583995 | chr15:25583988:25583995:-:0.93:0.000001 | - |
| Gm12878NucleolusTotalTssHmmV2 | chr15 | 25584026 | 25584209 | chr15:25584026:25584209:-:0.43:0.000000 | - |
| Gm12878NucleolusTotalTssHmmV2 | chr15 | 25584291 | 25584337 | chr15:25584291:25584337:-:0.26:0.000030 | - |
| Gm12878NucleolusTotalTssHmmV2 | chr15 | 25585230 | 25585377 | chr15:25585230:25585377:-:0.43:0.000103 | - |
| Gm12878NucleolusTotalTssHmmV2 | chr15 | 25587333 | 25587363 | chr15:25587333:25587363:-:0.52:0.001743 | - |
| Gm12878NucleolusTotalTssHmmV2 | chr15 | 25588545 | 25588618 | chr15:25588545:25588618:-:0.27:0.000001 | - |
| Gm12878NucleolusTotalTssHmmV2 | chr15 | 25588792 | 25588982 | chr15:25588792:25588982:-:0.21:0.000025 | - |
| Gm12878NucleolusTotalTssHmmV2 | chr15 | 25589086 | 25589153 | chr15:25589086:25589153:-:0.33:0.000000 | - |
| Gm12878NucleolusTotalTssHmmV2 | chr15 | 25590133 | 25590192 | chr15:25590133:25590192:-:0.39:0.000001 | - |
| Gm12878NucleolusTotalTssHmmV2 | chr15 | 25590442 | 25590553 | chr15:25590442:25590553:-:0.18:0.000198 | - |
| Gm12878NucleusPamTssHmmV2     | chr15 | 25577708 | 25577710 | chr15:25577708:25577710:-:5.03:0.000219 | - |
| Gm12878NucleusPapTssHmm       | chr15 | 25550016 | 25550091 | chr15:25550016:25550091:-:2.09:0.000006 | - |
| Gm12878NucleusPapTssHmm       | chr15 | 25564396 | 25564558 | chr15:25564396:25564558:-:0.37:0.000042 | - |
| Gm12878NucleusPapTssHmm       | chr15 | 25565957 | 25566014 | chr15:25565957:25566014:-:0.19:0.001873 | - |
| Gm12878NucleusPapTssHmm       | chr15 | 25572221 | 25572388 | chr15:25572221:25572388:-:1.17:0.000243 | - |
| Gm12878NucleusPapTssHmm       | chr15 | 25578215 | 25578411 | chr15:25578215:25578411:-:0.45:0.000023 | - |
| Gm12878NucleusPapTssHmm       | chr15 | 25579033 | 25579040 | chr15:25579033:25579040:-:2.32:0.000000 | - |
| Gm12878NucleusPapTssHmm       | chr15 | 25579778 | 25579788 | chr15:25579778:25579788:-:0.81:0.000001 | - |
| Gm12878NucleusPapTssHmm       | chr15 | 25582419 | 25582446 | chr15:25582419:25582446:-:0.83:0.000225 | - |
| Gm12878NucleusPapTssHmm       | chr15 | 25582723 | 25582874 | chr15:25582723:25582874:-:0.18:0.000003 | - |
| Gm12878NucleusPapTssHmm       | chr15 | 25582973 | 25582989 | chr15:25582973:25582989:-:0.42:0.000000 | - |



|                         |       |          |          |                                         |   |
|-------------------------|-------|----------|----------|-----------------------------------------|---|
| Gm12878NucleusPapTssHmm | chr15 | 25583442 | 25583503 | chr15:25583442:25583503:-:0.87:0.000084 | - |
| Gm12878NucleusPapTssHmm | chr15 | 25583785 | 25583804 | chr15:25583785:25583804:-:0.94:0.000031 | - |
| Gm12878NucleusPapTssHmm | chr15 | 25583844 | 25583849 | chr15:25583844:25583849:-:0.94:0.000003 | - |
| Gm12878NucleusPapTssHmm | chr15 | 25583988 | 25583995 | chr15:25583988:25583995:-:0.93:0.000001 | - |
| Gm12878NucleusPapTssHmm | chr15 | 25584026 | 25584209 | chr15:25584026:25584209:-:0.43:0.000000 | - |
| Gm12878NucleusPapTssHmm | chr15 | 25584246 | 25584253 | chr15:25584246:25584253:-:1.26:0.000000 | - |
| Gm12878NucleusPapTssHmm | chr15 | 25584291 | 25584337 | chr15:25584291:25584337:-:0.26:0.000030 | - |
| Gm12878NucleusPapTssHmm | chr15 | 25585230 | 25585377 | chr15:25585230:25585377:-:0.43:0.000103 | - |
| Gm12878NucleusPapTssHmm | chr15 | 25588792 | 25588982 | chr15:25588792:25588982:-:0.21:0.000025 | - |
| H1hescCellPamTssHmmV2   | chr15 | 25357693 | 25357880 | chr15:25357693:25357880:-:0.18:0.000000 | - |
| H1hescCellPamTssHmmV2   | chr15 | 25359027 | 25359113 | chr15:25359027:25359113:-:0.13:0.000003 | - |
| H1hescCellPamTssHmmV2   | chr15 | 25360669 | 25360811 | chr15:25360669:25360811:-:0.07:0.003666 | - |
| H1hescCellPamTssHmmV2   | chr15 | 25364269 | 25364331 | chr15:25364269:25364331:-:1.59:0.020926 | - |
| H1hescCellPamTssHmmV2   | chr15 | 25578920 | 25579118 | chr15:25578920:25579118:-:0.34:0.000000 | - |
| H1hescCellPamTssHmmV2   | chr15 | 25579775 | 25579788 | chr15:25579775:25579788:-:1.72:0.000001 | - |
| H1hescCellPamTssHmmV2   | chr15 | 25582421 | 25582574 | chr15:25582421:25582574:-:0.08:0.000573 | - |
| H1hescCellPamTssHmmV2   | chr15 | 25582733 | 25582915 | chr15:25582733:25582915:-:0.06:0.000000 | - |
| H1hescCellPamTssHmmV2   | chr15 | 25583783 | 25583804 | chr15:25583783:25583804:-:0.69:0.000031 | - |
| H1hescCellPamTssHmmV2   | chr15 | 25584093 | 25584254 | chr15:25584093:25584254:-:0.10:0.000000 | - |
| H1hescCellPamTssHmmV2   | chr15 | 25584317 | 25584362 | chr15:25584317:25584362:-:0.10:0.000559 | - |
| H1hescCellPamTssHmmV2   | chr15 | 25585266 | 25585379 | chr15:25585266:25585379:-:1.46:0.000044 | - |
| H1hescCellPamTssHmmV2   | chr15 | 25587822 | 25587907 | chr15:25587822:25587907:-:0.31:0.010969 | - |
| H1hescCellPamTssHmmV2   | chr15 | 25590109 | 25590177 | chr15:25590109:25590177:-:0.25:0.000005 | - |
| H1hescCellPapTssHmm     | chr15 | 25360669 | 25360811 | chr15:25360669:25360811:-:0.07:0.003666 | - |
| H1hescCellPapTssHmm     | chr15 | 25362584 | 25362646 | chr15:25362584:25362646:-:2.06:0.000887 | - |
| H1hescCellPapTssHmm     | chr15 | 25364269 | 25364331 | chr15:25364269:25364331:-:1.59:0.020926 | - |
| H1hescCellPapTssHmm     | chr15 | 25578920 | 25579118 | chr15:25578920:25579118:-:0.34:0.000000 | - |
| H1hescCellPapTssHmm     | chr15 | 25579517 | 25579573 | chr15:25579517:25579573:-:0.80:0.000007 | - |
| H1hescCellPapTssHmm     | chr15 | 25579775 | 25579788 | chr15:25579775:25579788:-:1.72:0.000001 | - |
| H1hescCellPapTssHmm     | chr15 | 25582421 | 25582574 | chr15:25582421:25582574:-:0.08:0.000573 | - |

|                       |       |          |          |                                         |   |
|-----------------------|-------|----------|----------|-----------------------------------------|---|
| H1hesCellPapTssHmm    | chr15 | 25582733 | 25582915 | chr15:25582733:25582915:-:0.06:0.000000 | - |
| H1hesCellPapTssHmm    | chr15 | 25583392 | 25583504 | chr15:25583392:25583504:-:0.04:0.000173 | - |
| H1hesCellPapTssHmm    | chr15 | 25583783 | 25583804 | chr15:25583783:25583804:-:0.69:0.000031 | - |
| H1hesCellPapTssHmm    | chr15 | 25583844 | 25583863 | chr15:25583844:25583863:-:0.37:0.000010 | - |
| H1hesCellPapTssHmm    | chr15 | 25583988 | 25583997 | chr15:25583988:25583997:-:1.27:0.000002 | - |
| H1hesCellPapTssHmm    | chr15 | 25584093 | 25584254 | chr15:25584093:25584254:-:0.10:0.000000 | - |
| H1hesCellPapTssHmm    | chr15 | 25584317 | 25584362 | chr15:25584317:25584362:-:0.10:0.000559 | - |
| H1hesCellPapTssHmm    | chr15 | 25585266 | 25585379 | chr15:25585266:25585379:-:1.46:0.000044 | - |
| H1hesCytosolPapTssHmm | chr15 | 25579034 | 25579040 | chr15:25579034:25579040:-:0.000001      | - |
| H1hesCytosolPapTssHmm | chr15 | 25584093 | 25584164 | chr15:25584093:25584164:-:0.000000      | - |
| H1hesCytosolPapTssHmm | chr15 | 25585282 | 25585379 | chr15:25585282:25585379:-:0.000007      | - |
| H1hesNucleusPapTssHmm | chr15 | 25360606 | 25360794 | chr15:25360606:25360794:-:0.001135      | - |
| H1hesNucleusPapTssHmm | chr15 | 25579031 | 25579039 | chr15:25579031:25579039:-:0.000011      | - |
| H1hesNucleusPapTssHmm | chr15 | 25582736 | 25582746 | chr15:25582736:25582746:-:0.000004      | - |
| H1hesNucleusPapTssHmm | chr15 | 25584095 | 25584207 | chr15:25584095:25584207:-:0.000119      | - |
| H1hesNucleusPapTssHmm | chr15 | 25585277 | 25585377 | chr15:25585277:25585377:-:0.000081      | - |
| HaoafCellPapTssHmm    | chr15 | 25584095 | 25584109 | chr15:25584095:25584109:-:0.000000      | - |
| HaoecCellPapTssHmm    | chr15 | 25583429 | 25583449 | chr15:25583429:25583449:-:0.000000      | - |
| HaoecCellPapTssHmm    | chr15 | 25583788 | 25583794 | chr15:25583788:25583794:-:0.000001      | - |
| HaoecCellPapTssHmm    | chr15 | 25584094 | 25584106 | chr15:25584094:25584106:-:0.000000      | - |
| HchCellPapTssHmm      | chr15 | 25584094 | 25584106 | chr15:25584094:25584106:-:0.000000      | - |
| Helas3CellPapTssHmm   | chr15 | 25565994 | 25566000 | chr15:25565994:25566000:-:6.07:0.004237 | - |
| Helas3CellPapTssHmm   | chr15 | 25578212 | 25578412 | chr15:25578212:25578412:-:0.20:0.000076 | - |
| Helas3CellPapTssHmm   | chr15 | 25578922 | 25579043 | chr15:25578922:25579043:-:0.04:0.000000 | - |
| Helas3CellPapTssHmm   | chr15 | 25579517 | 25579577 | chr15:25579517:25579577:-:1.03:0.000025 | - |
| Helas3CellPapTssHmm   | chr15 | 25579779 | 25579787 | chr15:25579779:25579787:-:3.64:0.000000 | - |
| Helas3CellPapTssHmm   | chr15 | 25582742 | 25582778 | chr15:25582742:25582778:-:0.03:0.000010 | - |
| Helas3CellPapTssHmm   | chr15 | 25583447 | 25583510 | chr15:25583447:25583510:-:1.16:0.000203 | - |
| Helas3CellPapTssHmm   | chr15 | 25583788 | 25583797 | chr15:25583788:25583797:-:0.14:0.000044 | - |
| Helas3CellPapTssHmm   | chr15 | 25583986 | 25583999 | chr15:25583986:25583999:-:0.10:0.000003 | - |

|                          |       |          |          |                                         |   |
|--------------------------|-------|----------|----------|-----------------------------------------|---|
| Helas3CellPapTssHmm      | chr15 | 25584093 | 25584254 | chr15:25584093:25584254:-:0.41:0.000000 | - |
| Helas3CellPapTssHmm      | chr15 | 25584289 | 25584333 | chr15:25584289:25584333:-:0.17:0.000052 | - |
| Helas3CellPapTssHmm      | chr15 | 25584403 | 25584405 | chr15:25584403:25584405:-:4.49:0.000015 | - |
| Helas3CellPapTssHmm      | chr15 | 25585230 | 25585377 | chr15:25585230:25585377:-:1.40:0.000103 | - |
| Helas3CytosolPamTssHmm   | chr15 | 25584093 | 25584254 | chr15:25584093:25584254:-:0.41:0.000000 | - |
| Helas3CytosolPamTssHmmV2 | chr15 | 25584093 | 25584254 | chr15:25584093:25584254:-:0.41:0.000000 | - |
| Helas3CytosolPapTssHmm   | chr15 | 25578922 | 25579043 | chr15:25578922:25579043:-:0.04:0.000000 | - |
| Helas3CytosolPapTssHmm   | chr15 | 25579779 | 25579787 | chr15:25579779:25579787:-:3.64:0.000000 | - |
| Helas3CytosolPapTssHmm   | chr15 | 25582419 | 25582444 | chr15:25582419:25582444:-:2.53:0.000114 | - |
| Helas3CytosolPapTssHmm   | chr15 | 25582742 | 25582778 | chr15:25582742:25582778:-:0.03:0.000010 | - |
| Helas3CytosolPapTssHmm   | chr15 | 25583788 | 25583797 | chr15:25583788:25583797:-:0.14:0.000044 | - |
| Helas3CytosolPapTssHmm   | chr15 | 25583986 | 25583999 | chr15:25583986:25583999:-:0.10:0.000003 | - |
| Helas3CytosolPapTssHmm   | chr15 | 25584093 | 25584254 | chr15:25584093:25584254:-:0.41:0.000000 | - |
| Helas3CytosolPapTssHmm   | chr15 | 25584289 | 25584333 | chr15:25584289:25584333:-:0.17:0.000052 | - |
| Helas3CytosolPapTssHmm   | chr15 | 25584403 | 25584405 | chr15:25584403:25584405:-:4.49:0.000015 | - |
| Helas3CytosolPapTssHmm   | chr15 | 25585230 | 25585377 | chr15:25585230:25585377:-:1.40:0.000103 | - |
| Helas3NucleusPamTssHmm   | chr15 | 25585230 | 25585283 | chr15:25585230:25585283:-:0.000001      | - |
| Helas3NucleusPapTssHmm   | chr15 | 25565994 | 25566000 | chr15:25565994:25566000:-:6.07:0.004237 | - |
| Helas3NucleusPapTssHmm   | chr15 | 25578212 | 25578412 | chr15:25578212:25578412:-:0.20:0.000076 | - |
| Helas3NucleusPapTssHmm   | chr15 | 25578922 | 25579043 | chr15:25578922:25579043:-:0.04:0.000000 | - |
| Helas3NucleusPapTssHmm   | chr15 | 25579517 | 25579577 | chr15:25579517:25579577:-:1.03:0.000025 | - |
| Helas3NucleusPapTssHmm   | chr15 | 25579779 | 25579787 | chr15:25579779:25579787:-:3.64:0.000000 | - |
| Helas3NucleusPapTssHmm   | chr15 | 25582419 | 25582444 | chr15:25582419:25582444:-:2.53:0.000114 | - |
| Helas3NucleusPapTssHmm   | chr15 | 25582742 | 25582778 | chr15:25582742:25582778:-:0.03:0.000010 | - |
| Helas3NucleusPapTssHmm   | chr15 | 25583447 | 25583510 | chr15:25583447:25583510:-:1.16:0.000203 | - |
| Helas3NucleusPapTssHmm   | chr15 | 25583788 | 25583797 | chr15:25583788:25583797:-:0.14:0.000044 | - |
| Helas3NucleusPapTssHmm   | chr15 | 25583986 | 25583999 | chr15:25583986:25583999:-:0.10:0.000003 | - |
| Helas3NucleusPapTssHmm   | chr15 | 25584093 | 25584254 | chr15:25584093:25584254:-:0.41:0.000000 | - |
| Helas3NucleusPapTssHmm   | chr15 | 25584289 | 25584333 | chr15:25584289:25584333:-:0.17:0.000052 | - |
| Helas3NucleusPapTssHmm   | chr15 | 25585024 | 25585029 | chr15:25585024:25585029:-:1.31:0.000001 | - |

|                         |       |          |          |                                         |   |
|-------------------------|-------|----------|----------|-----------------------------------------|---|
| Helas3NucleusPapTssHmm  | chr15 | 25585230 | 25585377 | chr15:25585230:25585377:-:1.40:0.000103 | - |
| Hepg2CellPapTssHmmV2    | chr15 | 25550013 | 25550062 | chr15:25550013:25550062:-:1.51:0.000001 | - |
| Hepg2CellPapTssHmmV2    | chr15 | 25564379 | 25564496 | chr15:25564379:25564496:-:0.80:0.000033 | - |
| Hepg2CellPapTssHmmV2    | chr15 | 25565981 | 25566020 | chr15:25565981:25566020:-:1.07:0.002160 | - |
| Hepg2CellPapTssHmmV2    | chr15 | 25578945 | 25579040 | chr15:25578945:25579040:-:0.47:0.000000 | - |
| Hepg2CellPapTssHmmV2    | chr15 | 25579778 | 25579814 | chr15:25579778:25579814:-:0.56:0.000000 | - |
| Hepg2CellPapTssHmmV2    | chr15 | 25582412 | 25582446 | chr15:25582412:25582446:-:0.30:0.000225 | - |
| Hepg2CellPapTssHmmV2    | chr15 | 25582732 | 25582747 | chr15:25582732:25582747:-:0.26:0.000056 | - |
| Hepg2CellPapTssHmmV2    | chr15 | 25582912 | 25583044 | chr15:25582912:25583044:-:0.24:0.000000 | - |
| Hepg2CellPapTssHmmV2    | chr15 | 25583411 | 25583499 | chr15:25583411:25583499:-:0.28:0.000071 | - |
| Hepg2CellPapTssHmmV2    | chr15 | 25583651 | 25583663 | chr15:25583651:25583663:-:0.95:0.000028 | - |
| Hepg2CellPapTssHmmV2    | chr15 | 25583784 | 25583804 | chr15:25583784:25583804:-:1.50:0.000031 | - |
| Hepg2CellPapTssHmmV2    | chr15 | 25583844 | 25583865 | chr15:25583844:25583865:-:0.04:0.000020 | - |
| Hepg2CellPapTssHmmV2    | chr15 | 25583985 | 25583999 | chr15:25583985:25583999:-:0.91:0.000003 | - |
| Hepg2CellPapTssHmmV2    | chr15 | 25584061 | 25584068 | chr15:25584061:25584068:-:0.12:0.000010 | - |
| Hepg2CellPapTssHmmV2    | chr15 | 25584094 | 25584223 | chr15:25584094:25584223:-:0.53:0.000001 | - |
| Hepg2CellPapTssHmmV2    | chr15 | 25584246 | 25584253 | chr15:25584246:25584253:-:1.42:0.000000 | - |
| Hepg2CellPapTssHmmV2    | chr15 | 25584318 | 25584380 | chr15:25584318:25584380:-:0.35:0.000553 | - |
| Hepg2CellPapTssHmmV2    | chr15 | 25585227 | 25585379 | chr15:25585227:25585379:-:0.38:0.000044 | - |
| Hepg2CytosolPamTssHmmV2 | chr15 | 25571949 | 25571969 | chr15:25571949:25571969:-:0.18:0.000713 | - |
| Hepg2CytosolPamTssHmmV2 | chr15 | 25573507 | 25573623 | chr15:25573507:25573623:-:0.73:0.000005 | - |
| Hepg2CytosolPamTssHmmV2 | chr15 | 25579078 | 25579107 | chr15:25579078:25579107:-:0.18:0.000005 | - |
| Hepg2CytosolPamTssHmmV2 | chr15 | 25579201 | 25579212 | chr15:25579201:25579212:-:0.57:0.000013 | - |
| Hepg2CytosolPamTssHmmV2 | chr15 | 25579778 | 25579814 | chr15:25579778:25579814:-:0.56:0.000000 | - |
| Hepg2CytosolPamTssHmmV2 | chr15 | 25582412 | 25582446 | chr15:25582412:25582446:-:0.30:0.000225 | - |
| Hepg2CytosolPamTssHmmV2 | chr15 | 25583651 | 25583663 | chr15:25583651:25583663:-:0.95:0.000028 | - |
| Hepg2CytosolPamTssHmmV2 | chr15 | 25583784 | 25583804 | chr15:25583784:25583804:-:1.50:0.000031 | - |
| Hepg2CytosolPamTssHmmV2 | chr15 | 25583844 | 25583865 | chr15:25583844:25583865:-:0.04:0.000020 | - |
| Hepg2CytosolPamTssHmmV2 | chr15 | 25583971 | 25583975 | chr15:25583971:25583975:-:0.31:0.000000 | - |
| Hepg2CytosolPamTssHmmV2 | chr15 | 25583985 | 25583999 | chr15:25583985:25583999:-:0.91:0.000003 | - |

|                             |       |          |          |                                         |   |
|-----------------------------|-------|----------|----------|-----------------------------------------|---|
| Hepg2CytosolPamTssHmmV2     | chr15 | 25584043 | 25584047 | chr15:25584043:25584047:-:0.12:0.000021 | - |
| Hepg2CytosolPamTssHmmV2     | chr15 | 25584061 | 25584068 | chr15:25584061:25584068:-:0.12:0.000010 | - |
| Hepg2CytosolPamTssHmmV2     | chr15 | 25584094 | 25584223 | chr15:25584094:25584223:-:0.53:0.000001 | - |
| Hepg2CytosolPamTssHmmV2     | chr15 | 25584318 | 25584380 | chr15:25584318:25584380:-:0.35:0.000553 | - |
| Hepg2CytosolPamTssHmmV2     | chr15 | 25585227 | 25585379 | chr15:25585227:25585379:-:0.38:0.000044 | - |
| Hepg2CytosolPamTssHmmV2     | chr15 | 25588752 | 25588836 | chr15:25588752:25588836:-:1.25:0.000003 | - |
| Hepg2CytosolPapTssHmm       | chr15 | 25578945 | 25579040 | chr15:25578945:25579040:-:0.47:0.000000 | - |
| Hepg2CytosolPapTssHmm       | chr15 | 25579452 | 25579562 | chr15:25579452:25579562:-:0.04:0.000002 | - |
| Hepg2CytosolPapTssHmm       | chr15 | 25582732 | 25582747 | chr15:25582732:25582747:-:0.26:0.000056 | - |
| Hepg2CytosolPapTssHmm       | chr15 | 25582848 | 25582875 | chr15:25582848:25582875:-:0.49:0.000002 | - |
| Hepg2CytosolPapTssHmm       | chr15 | 25582912 | 25583044 | chr15:25582912:25583044:-:0.24:0.000000 | - |
| Hepg2CytosolPapTssHmm       | chr15 | 25583651 | 25583663 | chr15:25583651:25583663:-:0.95:0.000028 | - |
| Hepg2CytosolPapTssHmm       | chr15 | 25583784 | 25583804 | chr15:25583784:25583804:-:1.50:0.000031 | - |
| Hepg2CytosolPapTssHmm       | chr15 | 25583844 | 25583865 | chr15:25583844:25583865:-:0.04:0.000020 | - |
| Hepg2CytosolPapTssHmm       | chr15 | 25583985 | 25583999 | chr15:25583985:25583999:-:0.91:0.000003 | - |
| Hepg2CytosolPapTssHmm       | chr15 | 25584094 | 25584223 | chr15:25584094:25584223:-:0.53:0.000001 | - |
| Hepg2CytosolPapTssHmm       | chr15 | 25584246 | 25584253 | chr15:25584246:25584253:-:1.42:0.000000 | - |
| Hepg2CytosolPapTssHmm       | chr15 | 25584318 | 25584380 | chr15:25584318:25584380:-:0.35:0.000553 | - |
| Hepg2CytosolPapTssHmm       | chr15 | 25585227 | 25585379 | chr15:25585227:25585379:-:0.38:0.000044 | - |
| Hepg2NucleolusTotalTssHmmV3 | chr15 | 25550013 | 25550062 | chr15:25550013:25550062:-:1.51:0.000001 | - |
| Hepg2NucleolusTotalTssHmmV3 | chr15 | 25562986 | 25563107 | chr15:25562986:25563107:-:1.27:0.000004 | - |
| Hepg2NucleolusTotalTssHmmV3 | chr15 | 25565141 | 25565267 | chr15:25565141:25565267:-:0.31:0.003204 | - |
| Hepg2NucleolusTotalTssHmmV3 | chr15 | 25565981 | 25566020 | chr15:25565981:25566020:-:1.07:0.002160 | - |
| Hepg2NucleolusTotalTssHmmV3 | chr15 | 25566607 | 25566670 | chr15:25566607:25566670:-:0.09:0.000691 | - |
| Hepg2NucleolusTotalTssHmmV3 | chr15 | 25567253 | 25567348 | chr15:25567253:25567348:-:0.49:0.000245 | - |
| Hepg2NucleolusTotalTssHmmV3 | chr15 | 25567471 | 25567656 | chr15:25567471:25567656:-:0.45:0.004144 | - |
| Hepg2NucleolusTotalTssHmmV3 | chr15 | 25568902 | 25569102 | chr15:25568902:25569102:-:0.99:0.000294 | - |
| Hepg2NucleolusTotalTssHmmV3 | chr15 | 25570327 | 25570393 | chr15:25570327:25570393:-:0.30:0.000021 | - |
| Hepg2NucleolusTotalTssHmmV3 | chr15 | 25572236 | 25572370 | chr15:25572236:25572370:-:0.04:0.000762 | - |
| Hepg2NucleolusTotalTssHmmV3 | chr15 | 25573868 | 25573894 | chr15:25573868:25573894:-:0.52:0.000107 | - |

|                             |       |          |          |                                         |   |
|-----------------------------|-------|----------|----------|-----------------------------------------|---|
| Hepg2NucleolusTotalTssHmmV3 | chr15 | 25577014 | 25577076 | chr15:25577014:25577076:-:2.32:0.000009 | - |
| Hepg2NucleolusTotalTssHmmV3 | chr15 | 25578593 | 25578716 | chr15:25578593:25578716:-:0.22:0.000022 | - |
| Hepg2NucleolusTotalTssHmmV3 | chr15 | 25578945 | 25579040 | chr15:25578945:25579040:-:0.47:0.000000 | - |
| Hepg2NucleolusTotalTssHmmV3 | chr15 | 25579201 | 25579212 | chr15:25579201:25579212:-:0.57:0.000013 | - |
| Hepg2NucleolusTotalTssHmmV3 | chr15 | 25579357 | 25579387 | chr15:25579357:25579387:-:0.04:0.000000 | - |
| Hepg2NucleolusTotalTssHmmV3 | chr15 | 25579452 | 25579562 | chr15:25579452:25579562:-:0.04:0.000002 | - |
| Hepg2NucleolusTotalTssHmmV3 | chr15 | 25579594 | 25579611 | chr15:25579594:25579611:-:0.57:0.000009 | - |
| Hepg2NucleolusTotalTssHmmV3 | chr15 | 25579651 | 25579666 | chr15:25579651:25579666:-:0.87:0.000005 | - |
| Hepg2NucleolusTotalTssHmmV3 | chr15 | 25579778 | 25579814 | chr15:25579778:25579814:-:0.56:0.000000 | - |
| Hepg2NucleolusTotalTssHmmV3 | chr15 | 25580309 | 25580342 | chr15:25580309:25580342:-:0.40:0.000620 | - |
| Hepg2NucleolusTotalTssHmmV3 | chr15 | 25581175 | 25581219 | chr15:25581175:25581219:-:0.67:0.002829 | - |
| Hepg2NucleolusTotalTssHmmV3 | chr15 | 25582412 | 25582446 | chr15:25582412:25582446:-:0.30:0.000225 | - |
| Hepg2NucleolusTotalTssHmmV3 | chr15 | 25582848 | 25582875 | chr15:25582848:25582875:-:0.49:0.000002 | - |
| Hepg2NucleolusTotalTssHmmV3 | chr15 | 25582912 | 25583044 | chr15:25582912:25583044:-:0.24:0.000000 | - |
| Hepg2NucleolusTotalTssHmmV3 | chr15 | 25583411 | 25583499 | chr15:25583411:25583499:-:0.28:0.000071 | - |
| Hepg2NucleolusTotalTssHmmV3 | chr15 | 25583784 | 25583804 | chr15:25583784:25583804:-:1.50:0.000031 | - |
| Hepg2NucleolusTotalTssHmmV3 | chr15 | 25583844 | 25583865 | chr15:25583844:25583865:-:0.04:0.000020 | - |
| Hepg2NucleolusTotalTssHmmV3 | chr15 | 25583971 | 25583975 | chr15:25583971:25583975:-:0.31:0.000000 | - |
| Hepg2NucleolusTotalTssHmmV3 | chr15 | 25583985 | 25583999 | chr15:25583985:25583999:-:0.91:0.000003 | - |
| Hepg2NucleolusTotalTssHmmV3 | chr15 | 25584094 | 25584223 | chr15:25584094:25584223:-:0.53:0.000001 | - |
| Hepg2NucleolusTotalTssHmmV3 | chr15 | 25584318 | 25584380 | chr15:25584318:25584380:-:0.35:0.000553 | - |
| Hepg2NucleolusTotalTssHmmV3 | chr15 | 25584909 | 25584914 | chr15:25584909:25584914:-:1.09:0.000038 | - |
| Hepg2NucleolusTotalTssHmmV3 | chr15 | 25585227 | 25585379 | chr15:25585227:25585379:-:0.38:0.000044 | - |
| Hepg2NucleolusTotalTssHmmV3 | chr15 | 25587209 | 25587247 | chr15:25587209:25587247:-:0.08:0.000624 | - |
| Hepg2NucleolusTotalTssHmmV3 | chr15 | 25587583 | 25587598 | chr15:25587583:25587598:-:1.08:0.000000 | - |
| Hepg2NucleolusTotalTssHmmV3 | chr15 | 25588453 | 25588491 | chr15:25588453:25588491:-:0.58:0.000033 | - |
| Hepg2NucleolusTotalTssHmmV3 | chr15 | 25588605 | 25588626 | chr15:25588605:25588626:-:1.22:0.000003 | - |
| Hepg2NucleolusTotalTssHmmV3 | chr15 | 25588752 | 25588836 | chr15:25588752:25588836:-:1.25:0.000003 | - |
| Hepg2NucleolusTotalTssHmmV3 | chr15 | 25588901 | 25588995 | chr15:25588901:25588995:-:0.01:0.000000 | - |
| Hepg2NucleolusTotalTssHmmV3 | chr15 | 25589060 | 25589088 | chr15:25589060:25589088:-:0.61:0.000002 | - |

|                             |       |          |          |                                         |   |
|-----------------------------|-------|----------|----------|-----------------------------------------|---|
| Hepg2NucleolusTotalTssHmmV3 | chr15 | 25590126 | 25590234 | chr15:25590126:25590234:-:0.68:0.000336 | - |
| Hepg2NucleusPamTssHmmV2     | chr15 | 25550013 | 25550062 | chr15:25550013:25550062:-:1.51:0.000001 | - |
| Hepg2NucleusPamTssHmmV2     | chr15 | 25565141 | 25565267 | chr15:25565141:25565267:-:0.31:0.003204 | - |
| Hepg2NucleusPamTssHmmV2     | chr15 | 25565981 | 25566020 | chr15:25565981:25566020:-:1.07:0.002160 | - |
| Hepg2NucleusPamTssHmmV2     | chr15 | 25566607 | 25566670 | chr15:25566607:25566670:-:0.09:0.000691 | - |
| Hepg2NucleusPamTssHmmV2     | chr15 | 25567471 | 25567656 | chr15:25567471:25567656:-:0.45:0.004144 | - |
| Hepg2NucleusPamTssHmmV2     | chr15 | 25568902 | 25569102 | chr15:25568902:25569102:-:0.99:0.000294 | - |
| Hepg2NucleusPamTssHmmV2     | chr15 | 25570327 | 25570393 | chr15:25570327:25570393:-:0.30:0.000021 | - |
| Hepg2NucleusPamTssHmmV2     | chr15 | 25571949 | 25571969 | chr15:25571949:25571969:-:0.18:0.000713 | - |
| Hepg2NucleusPamTssHmmV2     | chr15 | 25572162 | 25572181 | chr15:25572162:25572181:-:0.97:0.000000 | - |
| Hepg2NucleusPamTssHmmV2     | chr15 | 25572236 | 25572370 | chr15:25572236:25572370:-:0.04:0.000762 | - |
| Hepg2NucleusPamTssHmmV2     | chr15 | 25573507 | 25573623 | chr15:25573507:25573623:-:0.73:0.000005 | - |
| Hepg2NucleusPamTssHmmV2     | chr15 | 25573868 | 25573894 | chr15:25573868:25573894:-:0.52:0.000107 | - |
| Hepg2NucleusPamTssHmmV2     | chr15 | 25577014 | 25577076 | chr15:25577014:25577076:-:2.32:0.000009 | - |
| Hepg2NucleusPamTssHmmV2     | chr15 | 25578402 | 25578415 | chr15:25578402:25578415:-:3.18:0.000078 | - |
| Hepg2NucleusPamTssHmmV2     | chr15 | 25578593 | 25578716 | chr15:25578593:25578716:-:0.22:0.000022 | - |
| Hepg2NucleusPamTssHmmV2     | chr15 | 25578945 | 25579040 | chr15:25578945:25579040:-:0.47:0.000000 | - |
| Hepg2NucleusPamTssHmmV2     | chr15 | 25579078 | 25579107 | chr15:25579078:25579107:-:0.18:0.000005 | - |
| Hepg2NucleusPamTssHmmV2     | chr15 | 25579201 | 25579212 | chr15:25579201:25579212:-:0.57:0.000013 | - |
| Hepg2NucleusPamTssHmmV2     | chr15 | 25579357 | 25579387 | chr15:25579357:25579387:-:0.04:0.000000 | - |
| Hepg2NucleusPamTssHmmV2     | chr15 | 25579452 | 25579562 | chr15:25579452:25579562:-:0.04:0.000002 | - |
| Hepg2NucleusPamTssHmmV2     | chr15 | 25579594 | 25579611 | chr15:25579594:25579611:-:0.57:0.000009 | - |
| Hepg2NucleusPamTssHmmV2     | chr15 | 25579651 | 25579666 | chr15:25579651:25579666:-:0.87:0.000005 | - |
| Hepg2NucleusPamTssHmmV2     | chr15 | 25579778 | 25579814 | chr15:25579778:25579814:-:0.56:0.000000 | - |
| Hepg2NucleusPamTssHmmV2     | chr15 | 25580309 | 25580342 | chr15:25580309:25580342:-:0.40:0.000620 | - |
| Hepg2NucleusPamTssHmmV2     | chr15 | 25581175 | 25581219 | chr15:25581175:25581219:-:0.67:0.002829 | - |
| Hepg2NucleusPamTssHmmV2     | chr15 | 25582412 | 25582446 | chr15:25582412:25582446:-:0.30:0.000225 | - |
| Hepg2NucleusPamTssHmmV2     | chr15 | 25582732 | 25582747 | chr15:25582732:25582747:-:0.26:0.000056 | - |
| Hepg2NucleusPamTssHmmV2     | chr15 | 25582912 | 25583044 | chr15:25582912:25583044:-:0.24:0.000000 | - |
| Hepg2NucleusPamTssHmmV2     | chr15 | 25583411 | 25583499 | chr15:25583411:25583499:-:0.28:0.000071 | - |

|                         |       |          |          |                                         |   |
|-------------------------|-------|----------|----------|-----------------------------------------|---|
| Hepg2NucleusPamTssHmmV2 | chr15 | 25583784 | 25583804 | chr15:25583784:25583804:-:1.50:0.000031 | - |
| Hepg2NucleusPamTssHmmV2 | chr15 | 25583844 | 25583865 | chr15:25583844:25583865:-:0.04:0.000020 | - |
| Hepg2NucleusPamTssHmmV2 | chr15 | 25583971 | 25583975 | chr15:25583971:25583975:-:0.31:0.000000 | - |
| Hepg2NucleusPamTssHmmV2 | chr15 | 25583985 | 25583999 | chr15:25583985:25583999:-:0.91:0.000003 | - |
| Hepg2NucleusPamTssHmmV2 | chr15 | 25584043 | 25584047 | chr15:25584043:25584047:-:0.12:0.000021 | - |
| Hepg2NucleusPamTssHmmV2 | chr15 | 25584061 | 25584068 | chr15:25584061:25584068:-:0.12:0.000010 | - |
| Hepg2NucleusPamTssHmmV2 | chr15 | 25584094 | 25584223 | chr15:25584094:25584223:-:0.53:0.000001 | - |
| Hepg2NucleusPamTssHmmV2 | chr15 | 25584318 | 25584380 | chr15:25584318:25584380:-:0.35:0.000553 | - |
| Hepg2NucleusPamTssHmmV2 | chr15 | 25584909 | 25584914 | chr15:25584909:25584914:-:1.09:0.000038 | - |
| Hepg2NucleusPamTssHmmV2 | chr15 | 25585023 | 25585028 | chr15:25585023:25585028:-:2.09:0.000001 | - |
| Hepg2NucleusPamTssHmmV2 | chr15 | 25585227 | 25585379 | chr15:25585227:25585379:-:0.38:0.000044 | - |
| Hepg2NucleusPamTssHmmV2 | chr15 | 25587209 | 25587247 | chr15:25587209:25587247:-:0.08:0.000624 | - |
| Hepg2NucleusPamTssHmmV2 | chr15 | 25587583 | 25587598 | chr15:25587583:25587598:-:1.08:0.000000 | - |
| Hepg2NucleusPamTssHmmV2 | chr15 | 25588453 | 25588491 | chr15:25588453:25588491:-:0.58:0.000033 | - |
| Hepg2NucleusPamTssHmmV2 | chr15 | 25588605 | 25588626 | chr15:25588605:25588626:-:1.22:0.000003 | - |
| Hepg2NucleusPamTssHmmV2 | chr15 | 25588752 | 25588836 | chr15:25588752:25588836:-:1.25:0.000003 | - |
| Hepg2NucleusPamTssHmmV2 | chr15 | 25588901 | 25588995 | chr15:25588901:25588995:-:0.01:0.000000 | - |
| Hepg2NucleusPamTssHmmV2 | chr15 | 25589060 | 25589088 | chr15:25589060:25589088:-:0.61:0.000002 | - |
| Hepg2NucleusPamTssHmmV2 | chr15 | 25590126 | 25590234 | chr15:25590126:25590234:-:0.68:0.000336 | - |
| Hepg2NucleusPapTssHmm   | chr15 | 25562986 | 25563107 | chr15:25562986:25563107:-:1.27:0.000004 | - |
| Hepg2NucleusPapTssHmm   | chr15 | 25564379 | 25564496 | chr15:25564379:25564496:-:0.80:0.000033 | - |
| Hepg2NucleusPapTssHmm   | chr15 | 25565141 | 25565267 | chr15:25565141:25565267:-:0.31:0.003204 | - |
| Hepg2NucleusPapTssHmm   | chr15 | 25565981 | 25566020 | chr15:25565981:25566020:-:1.07:0.002160 | - |
| Hepg2NucleusPapTssHmm   | chr15 | 25567253 | 25567348 | chr15:25567253:25567348:-:0.49:0.000245 | - |
| Hepg2NucleusPapTssHmm   | chr15 | 25567471 | 25567656 | chr15:25567471:25567656:-:0.45:0.004144 | - |
| Hepg2NucleusPapTssHmm   | chr15 | 25572236 | 25572370 | chr15:25572236:25572370:-:0.04:0.000762 | - |
| Hepg2NucleusPapTssHmm   | chr15 | 25573868 | 25573894 | chr15:25573868:25573894:-:0.52:0.000107 | - |
| Hepg2NucleusPapTssHmm   | chr15 | 25578402 | 25578415 | chr15:25578402:25578415:-:3.18:0.000078 | - |
| Hepg2NucleusPapTssHmm   | chr15 | 25578593 | 25578716 | chr15:25578593:25578716:-:0.22:0.000022 | - |
| Hepg2NucleusPapTssHmm   | chr15 | 25578945 | 25579040 | chr15:25578945:25579040:-:0.47:0.000000 | - |



|                       |       |          |          |                                         |   |
|-----------------------|-------|----------|----------|-----------------------------------------|---|
| Hepg2NucleusPapTssHmm | chr15 | 25579452 | 25579562 | chr15:25579452:25579562:-:0.04:0.000002 | - |
| Hepg2NucleusPapTssHmm | chr15 | 25579778 | 25579814 | chr15:25579778:25579814:-:0.56:0.000000 | - |
| Hepg2NucleusPapTssHmm | chr15 | 25581175 | 25581219 | chr15:25581175:25581219:-:0.67:0.002829 | - |
| Hepg2NucleusPapTssHmm | chr15 | 25582732 | 25582747 | chr15:25582732:25582747:-:0.26:0.000056 | - |
| Hepg2NucleusPapTssHmm | chr15 | 25582912 | 25583044 | chr15:25582912:25583044:-:0.24:0.000000 | - |
| Hepg2NucleusPapTssHmm | chr15 | 25583411 | 25583499 | chr15:25583411:25583499:-:0.28:0.000071 | - |
| Hepg2NucleusPapTssHmm | chr15 | 25583784 | 25583804 | chr15:25583784:25583804:-:1.50:0.000031 | - |
| Hepg2NucleusPapTssHmm | chr15 | 25583985 | 25583999 | chr15:25583985:25583999:-:0.91:0.000003 | - |
| Hepg2NucleusPapTssHmm | chr15 | 25584094 | 25584223 | chr15:25584094:25584223:-:0.53:0.000001 | - |
| Hepg2NucleusPapTssHmm | chr15 | 25584246 | 25584253 | chr15:25584246:25584253:-:1.42:0.000000 | - |
| Hepg2NucleusPapTssHmm | chr15 | 25584318 | 25584380 | chr15:25584318:25584380:-:0.35:0.000553 | - |
| Hepg2NucleusPapTssHmm | chr15 | 25584909 | 25584914 | chr15:25584909:25584914:-:1.09:0.000038 | - |
| Hepg2NucleusPapTssHmm | chr15 | 25585023 | 25585028 | chr15:25585023:25585028:-:2.09:0.000001 | - |
| Hepg2NucleusPapTssHmm | chr15 | 25585227 | 25585379 | chr15:25585227:25585379:-:0.38:0.000044 | - |
| HmepcCellPapTssHmm    | chr15 | 25582515 | 25582547 | chr15:25582515:25582547:-:0.000002      | - |
| HmepcCellPapTssHmm    | chr15 | 25584096 | 25584106 | chr15:25584096:25584106:-:0.000001      | - |
| HmscatCellPapTssHmm   | chr15 | 25583790 | 25583803 | chr15:25583790:25583803:-:0.000000      | - |
| HmscatCellPapTssHmm   | chr15 | 25584097 | 25584111 | chr15:25584097:25584111:-:0.000000      | - |
| HmscucCellPapTssHmm   | chr15 | 25414365 | 25414388 | chr15:25414365:25414388:-:0.000000      | - |
| HmscucCellPapTssHmm   | chr15 | 25507641 | 25507649 | chr15:25507641:25507649:-:0.000000      | - |
| HmscucCellPapTssHmm   | chr15 | 25550015 | 25550018 | chr15:25550015:25550018:-:0.000000      | - |
| HmscucCellPapTssHmm   | chr15 | 25579036 | 25579039 | chr15:25579036:25579039:-:0.000000      | - |
| HmscucCellPapTssHmm   | chr15 | 25583790 | 25583793 | chr15:25583790:25583793:-:0.000000      | - |
| HmscucCellPapTssHmm   | chr15 | 25583870 | 25583874 | chr15:25583870:25583874:-:0.000000      | - |
| HmscucCellPapTssHmm   | chr15 | 25584104 | 25584106 | chr15:25584104:25584106:-:0.000000      | - |
| HmscucCellPapTssHmm   | chr15 | 25584160 | 25584163 | chr15:25584160:25584163:-:0.000003      | - |
| HmscucCellPapTssHmm   | chr15 | 25584186 | 25584192 | chr15:25584186:25584192:-:0.000113      | - |
| HmscucCellPapTssHmm   | chr15 | 25584247 | 25584251 | chr15:25584247:25584251:-:0.000006      | - |
| HmscucCellPapTssHmm   | chr15 | 25585267 | 25585374 | chr15:25585267:25585374:-:0.000000      | - |
| HobCellPapTssHmm      | chr15 | 25414365 | 25414561 | chr15:25414365:25414561:-:0.000002      | - |

|                     |       |          |          |                                         |   |
|---------------------|-------|----------|----------|-----------------------------------------|---|
| HobCellPapTssHmm    | chr15 | 25507643 | 25507649 | chr15:25507643:25507649:-:0.000000      | - |
| HobCellPapTssHmm    | chr15 | 25583760 | 25583797 | chr15:25583760:25583797:-:0.000000      | - |
| HobCellPapTssHmm    | chr15 | 25584104 | 25584106 | chr15:25584104:25584106:-:0.000000      | - |
| HobCellPapTssHmm    | chr15 | 25584246 | 25584250 | chr15:25584246:25584250:-:0.000002      | - |
| HobCellPapTssHmm    | chr15 | 25585281 | 25585423 | chr15:25585281:25585423:-:0.000000      | - |
| HpcplCellPapTssHmm  | chr15 | 25507641 | 25507649 | chr15:25507641:25507649:-:0.000000      | - |
| HpcplCellPapTssHmm  | chr15 | 25582421 | 25582534 | chr15:25582421:25582534:-:0.000089      | - |
| HpcplCellPapTssHmm  | chr15 | 25583790 | 25583804 | chr15:25583790:25583804:-:0.000000      | - |
| HpcplCellPapTssHmm  | chr15 | 25584095 | 25584107 | chr15:25584095:25584107:-:0.000000      | - |
| HpcplCellPapTssHmm  | chr15 | 25584300 | 25584354 | chr15:25584300:25584354:-:0.000000      | - |
| HsavecCellPapTssHmm | chr15 | 25414365 | 25414386 | chr15:25414365:25414386:-:0.000001      | - |
| HsavecCellPapTssHmm | chr15 | 25507643 | 25507648 | chr15:25507643:25507648:-:0.000000      | - |
| HsavecCellPapTssHmm | chr15 | 25584094 | 25584253 | chr15:25584094:25584253:-:0.000054      | - |
| HsavecCellPapTssHmm | chr15 | 25585268 | 25585375 | chr15:25585268:25585375:-:0.000000      | - |
| HuvecCellPapTssHmm  | chr15 | 25451856 | 25451861 | chr15:25451856:25451861:-:5.84:0.582246 | - |
| HuvecCellPapTssHmm  | chr15 | 25550013 | 25550061 | chr15:25550013:25550061:-:2.02:0.000001 | - |
| HuvecCellPapTssHmm  | chr15 | 25563021 | 25563142 | chr15:25563021:25563142:-:0.88:0.000001 | - |
| HuvecCellPapTssHmm  | chr15 | 25564385 | 25564496 | chr15:25564385:25564496:-:2.16:0.000033 | - |
| HuvecCellPapTssHmm  | chr15 | 25565992 | 25566000 | chr15:25565992:25566000:-:4.51:0.004237 | - |
| HuvecCellPapTssHmm  | chr15 | 25578922 | 25579040 | chr15:25578922:25579040:-:0.71:0.000000 | - |
| HuvecCellPapTssHmm  | chr15 | 25579552 | 25579672 | chr15:25579552:25579672:-:0.19:0.000068 | - |
| HuvecCellPapTssHmm  | chr15 | 25579777 | 25579809 | chr15:25579777:25579809:-:0.31:0.000001 | - |
| HuvecCellPapTssHmm  | chr15 | 25581046 | 25581048 | chr15:25581046:25581048:-:4.77:0.000146 | - |
| HuvecCellPapTssHmm  | chr15 | 25582418 | 25582452 | chr15:25582418:25582452:-:0.17:0.000113 | - |
| HuvecCellPapTssHmm  | chr15 | 25582722 | 25582746 | chr15:25582722:25582746:-:0.27:0.000032 | - |
| HuvecCellPapTssHmm  | chr15 | 25582808 | 25582876 | chr15:25582808:25582876:-:0.04:0.000003 | - |
| HuvecCellPapTssHmm  | chr15 | 25583446 | 25583511 | chr15:25583446:25583511:-:1.16:0.000076 | - |
| HuvecCellPapTssHmm  | chr15 | 25583786 | 25583804 | chr15:25583786:25583804:-:0.34:0.000031 | - |
| HuvecCellPapTssHmm  | chr15 | 25583985 | 25583993 | chr15:25583985:25583993:-:0.37:0.000001 | - |
| HuvecCellPapTssHmm  | chr15 | 25584093 | 25584224 | chr15:25584093:25584224:-:0.22:0.000000 | - |

|                         |       |          |          |                                         |   |
|-------------------------|-------|----------|----------|-----------------------------------------|---|
| HuvecCellPapTssHmm      | chr15 | 25584246 | 25584253 | chr15:25584246:25584253:-:1.29:0.000000 | - |
| HuvecCellPapTssHmm      | chr15 | 25584291 | 25584408 | chr15:25584291:25584408:-:0.01:0.000004 | - |
| HuvecCellPapTssHmm      | chr15 | 25584905 | 25584927 | chr15:25584905:25584927:-:0.28:0.000274 | - |
| HuvecCellPapTssHmm      | chr15 | 25585260 | 25585379 | chr15:25585260:25585379:-:0.10:0.000044 | - |
| HuvecCytosolPamTssHmmV2 | chr15 | 25414365 | 25414554 | chr15:25414365:25414554:-:0.57:0.862001 | - |
| HuvecCytosolPamTssHmmV2 | chr15 | 25550013 | 25550061 | chr15:25550013:25550061:-:2.02:0.000001 | - |
| HuvecCytosolPamTssHmmV2 | chr15 | 25572272 | 25572402 | chr15:25572272:25572402:-:1.77:0.015561 | - |
| HuvecCytosolPamTssHmmV2 | chr15 | 25578284 | 25578418 | chr15:25578284:25578418:-:0.63:0.000040 | - |
| HuvecCytosolPamTssHmmV2 | chr15 | 25578922 | 25579040 | chr15:25578922:25579040:-:0.71:0.000000 | - |
| HuvecCytosolPamTssHmmV2 | chr15 | 25581270 | 25581279 | chr15:25581270:25581279:-:2.77:0.000978 | - |
| HuvecCytosolPamTssHmmV2 | chr15 | 25582418 | 25582452 | chr15:25582418:25582452:-:0.17:0.000113 | - |
| HuvecCytosolPamTssHmmV2 | chr15 | 25582722 | 25582746 | chr15:25582722:25582746:-:0.27:0.000032 | - |
| HuvecCytosolPamTssHmmV2 | chr15 | 25582808 | 25582876 | chr15:25582808:25582876:-:0.04:0.000003 | - |
| HuvecCytosolPamTssHmmV2 | chr15 | 25582971 | 25583041 | chr15:25582971:25583041:-:0.45:0.000000 | - |
| HuvecCytosolPamTssHmmV2 | chr15 | 25583186 | 25583199 | chr15:25583186:25583199:-:0.37:0.000039 | - |
| HuvecCytosolPamTssHmmV2 | chr15 | 25583446 | 25583511 | chr15:25583446:25583511:-:1.16:0.000076 | - |
| HuvecCytosolPamTssHmmV2 | chr15 | 25583653 | 25583662 | chr15:25583653:25583662:-:0.57:0.000086 | - |
| HuvecCytosolPamTssHmmV2 | chr15 | 25583786 | 25583804 | chr15:25583786:25583804:-:0.34:0.000031 | - |
| HuvecCytosolPamTssHmmV2 | chr15 | 25583847 | 25583870 | chr15:25583847:25583870:-:0.34:0.000024 | - |
| HuvecCytosolPamTssHmmV2 | chr15 | 25583969 | 25583977 | chr15:25583969:25583977:-:0.02:0.000000 | - |
| HuvecCytosolPamTssHmmV2 | chr15 | 25583985 | 25583993 | chr15:25583985:25583993:-:0.37:0.000001 | - |
| HuvecCytosolPamTssHmmV2 | chr15 | 25584093 | 25584224 | chr15:25584093:25584224:-:0.22:0.000000 | - |
| HuvecCytosolPamTssHmmV2 | chr15 | 25584246 | 25584253 | chr15:25584246:25584253:-:1.29:0.000000 | - |
| HuvecCytosolPamTssHmmV2 | chr15 | 25584291 | 25584408 | chr15:25584291:25584408:-:0.01:0.000004 | - |
| HuvecCytosolPamTssHmmV2 | chr15 | 25585260 | 25585379 | chr15:25585260:25585379:-:0.10:0.000044 | - |
| HuvecCytosolPapTssHmm   | chr15 | 25414365 | 25414554 | chr15:25414365:25414554:-:0.57:0.862001 | - |
| HuvecCytosolPapTssHmm   | chr15 | 25451856 | 25451861 | chr15:25451856:25451861:-:5.84:0.582246 | - |
| HuvecCytosolPapTssHmm   | chr15 | 25550013 | 25550061 | chr15:25550013:25550061:-:2.02:0.000001 | - |
| HuvecCytosolPapTssHmm   | chr15 | 25578922 | 25579040 | chr15:25578922:25579040:-:0.71:0.000000 | - |
| HuvecCytosolPapTssHmm   | chr15 | 25579552 | 25579672 | chr15:25579552:25579672:-:0.19:0.000068 | - |

|                       |       |          |          |                                         |   |
|-----------------------|-------|----------|----------|-----------------------------------------|---|
| HuvecCytosolPapTssHmm | chr15 | 25579777 | 25579809 | chr15:25579777:25579809:-:0.31:0.000001 | - |
| HuvecCytosolPapTssHmm | chr15 | 25581046 | 25581048 | chr15:25581046:25581048:-:4.77:0.000146 | - |
| HuvecCytosolPapTssHmm | chr15 | 25582418 | 25582452 | chr15:25582418:25582452:-:0.17:0.000113 | - |
| HuvecCytosolPapTssHmm | chr15 | 25582722 | 25582746 | chr15:25582722:25582746:-:0.27:0.000032 | - |
| HuvecCytosolPapTssHmm | chr15 | 25582808 | 25582876 | chr15:25582808:25582876:-:0.04:0.000003 | - |
| HuvecCytosolPapTssHmm | chr15 | 25582971 | 25583041 | chr15:25582971:25583041:-:0.45:0.000000 | - |
| HuvecCytosolPapTssHmm | chr15 | 25583186 | 25583199 | chr15:25583186:25583199:-:0.37:0.000039 | - |
| HuvecCytosolPapTssHmm | chr15 | 25583387 | 25583396 | chr15:25583387:25583396:-:0.62:0.000029 | - |
| HuvecCytosolPapTssHmm | chr15 | 25583446 | 25583511 | chr15:25583446:25583511:-:1.16:0.000076 | - |
| HuvecCytosolPapTssHmm | chr15 | 25583653 | 25583662 | chr15:25583653:25583662:-:0.57:0.000086 | - |
| HuvecCytosolPapTssHmm | chr15 | 25583786 | 25583804 | chr15:25583786:25583804:-:0.34:0.000031 | - |
| HuvecCytosolPapTssHmm | chr15 | 25583847 | 25583870 | chr15:25583847:25583870:-:0.34:0.000024 | - |
| HuvecCytosolPapTssHmm | chr15 | 25583883 | 25583888 | chr15:25583883:25583888:-:1.08:0.000021 | - |
| HuvecCytosolPapTssHmm | chr15 | 25583969 | 25583977 | chr15:25583969:25583977:-:0.02:0.000000 | - |
| HuvecCytosolPapTssHmm | chr15 | 25583985 | 25583993 | chr15:25583985:25583993:-:0.37:0.000001 | - |
| HuvecCytosolPapTssHmm | chr15 | 25584055 | 25584059 | chr15:25584055:25584059:-:0.22:0.000004 | - |
| HuvecCytosolPapTssHmm | chr15 | 25584093 | 25584224 | chr15:25584093:25584224:-:0.22:0.000000 | - |
| HuvecCytosolPapTssHmm | chr15 | 25584246 | 25584253 | chr15:25584246:25584253:-:1.29:0.000000 | - |
| HuvecCytosolPapTssHmm | chr15 | 25584291 | 25584408 | chr15:25584291:25584408:-:0.01:0.000004 | - |
| HuvecCytosolPapTssHmm | chr15 | 25585260 | 25585379 | chr15:25585260:25585379:-:0.10:0.000044 | - |
| HuvecNucleusPapTssHmm | chr15 | 25550013 | 25550061 | chr15:25550013:25550061:-:2.02:0.000001 | - |
| HuvecNucleusPapTssHmm | chr15 | 25563021 | 25563142 | chr15:25563021:25563142:-:0.88:0.000001 | - |
| HuvecNucleusPapTssHmm | chr15 | 25564385 | 25564496 | chr15:25564385:25564496:-:2.16:0.000033 | - |
| HuvecNucleusPapTssHmm | chr15 | 25565222 | 25565265 | chr15:25565222:25565265:-:1.19:0.004544 | - |
| HuvecNucleusPapTssHmm | chr15 | 25565992 | 25566000 | chr15:25565992:25566000:-:4.51:0.004237 | - |
| HuvecNucleusPapTssHmm | chr15 | 25566273 | 25566318 | chr15:25566273:25566318:-:0.81:0.000055 | - |
| HuvecNucleusPapTssHmm | chr15 | 25572272 | 25572402 | chr15:25572272:25572402:-:1.77:0.015561 | - |
| HuvecNucleusPapTssHmm | chr15 | 25577820 | 25577882 | chr15:25577820:25577882:-:0.53:0.000095 | - |
| HuvecNucleusPapTssHmm | chr15 | 25578284 | 25578418 | chr15:25578284:25578418:-:0.63:0.000040 | - |
| HuvecNucleusPapTssHmm | chr15 | 25578922 | 25579040 | chr15:25578922:25579040:-:0.71:0.000000 | - |

|                       |       |          |          |                                         |   |
|-----------------------|-------|----------|----------|-----------------------------------------|---|
| HuvecNucleusPapTssHmm | chr15 | 25579552 | 25579672 | chr15:25579552:25579672:-:0.19:0.000068 | - |
| HuvecNucleusPapTssHmm | chr15 | 25579777 | 25579809 | chr15:25579777:25579809:-:0.31:0.000001 | - |
| HuvecNucleusPapTssHmm | chr15 | 25581046 | 25581048 | chr15:25581046:25581048:-:4.77:0.000146 | - |
| HuvecNucleusPapTssHmm | chr15 | 25581270 | 25581279 | chr15:25581270:25581279:-:2.77:0.000978 | - |
| HuvecNucleusPapTssHmm | chr15 | 25582418 | 25582452 | chr15:25582418:25582452:-:0.17:0.000113 | - |
| HuvecNucleusPapTssHmm | chr15 | 25582722 | 25582746 | chr15:25582722:25582746:-:0.27:0.000032 | - |
| HuvecNucleusPapTssHmm | chr15 | 25582808 | 25582876 | chr15:25582808:25582876:-:0.04:0.000003 | - |
| HuvecNucleusPapTssHmm | chr15 | 25582971 | 25583041 | chr15:25582971:25583041:-:0.45:0.000000 | - |
| HuvecNucleusPapTssHmm | chr15 | 25583186 | 25583199 | chr15:25583186:25583199:-:0.37:0.000039 | - |
| HuvecNucleusPapTssHmm | chr15 | 25583387 | 25583396 | chr15:25583387:25583396:-:0.62:0.000029 | - |
| HuvecNucleusPapTssHmm | chr15 | 25583446 | 25583511 | chr15:25583446:25583511:-:1.16:0.000076 | - |
| HuvecNucleusPapTssHmm | chr15 | 25583786 | 25583804 | chr15:25583786:25583804:-:0.34:0.000031 | - |
| HuvecNucleusPapTssHmm | chr15 | 25583847 | 25583870 | chr15:25583847:25583870:-:0.34:0.000024 | - |
| HuvecNucleusPapTssHmm | chr15 | 25583883 | 25583888 | chr15:25583883:25583888:-:1.08:0.000021 | - |
| HuvecNucleusPapTssHmm | chr15 | 25583969 | 25583977 | chr15:25583969:25583977:-:0.02:0.000000 | - |
| HuvecNucleusPapTssHmm | chr15 | 25583985 | 25583993 | chr15:25583985:25583993:-:0.37:0.000001 | - |
| HuvecNucleusPapTssHmm | chr15 | 25584055 | 25584059 | chr15:25584055:25584059:-:0.22:0.000004 | - |
| HuvecNucleusPapTssHmm | chr15 | 25584093 | 25584224 | chr15:25584093:25584224:-:0.22:0.000000 | - |
| HuvecNucleusPapTssHmm | chr15 | 25584246 | 25584253 | chr15:25584246:25584253:-:1.29:0.000000 | - |
| HuvecNucleusPapTssHmm | chr15 | 25584291 | 25584408 | chr15:25584291:25584408:-:0.01:0.000004 | - |
| HuvecNucleusPapTssHmm | chr15 | 25584905 | 25584927 | chr15:25584905:25584927:-:0.28:0.000274 | - |
| HuvecNucleusPapTssHmm | chr15 | 25585023 | 25585026 | chr15:25585023:25585026:-:1.98:0.000000 | - |
| HuvecNucleusPapTssHmm | chr15 | 25585260 | 25585379 | chr15:25585260:25585379:-:0.10:0.000044 | - |
| HvmfCellPapTssHmm     | chr15 | 25507642 | 25507649 | chr15:25507642:25507649:-:0.000000      | - |
| HvmfCellPapTssHmm     | chr15 | 25584104 | 25584106 | chr15:25584104:25584106:-:0.000000      | - |
| HvmfCellPapTssHmm     | chr15 | 25584201 | 25584209 | chr15:25584201:25584209:-:0.001657      | - |
| HvmfCellPapTssHmm     | chr15 | 25584246 | 25584251 | chr15:25584246:25584251:-:0.000001      | - |
| HvmfCellPapTssHmm     | chr15 | 25584317 | 25584333 | chr15:25584317:25584333:-:0.000000      | - |
| HvmfCellPapTssHmm     | chr15 | 25585267 | 25585381 | chr15:25585267:25585381:-:0.000000      | - |
| HwpCellPapTssHmm      | chr15 | 25414365 | 25414562 | chr15:25414365:25414562:-:0.000003      | - |

|                       |       |          |          |                                    |   |
|-----------------------|-------|----------|----------|------------------------------------|---|
| HwpCellPapTssHmm      | chr15 | 25507641 | 25507649 | chr15:25507641:25507649:-:0.000000 | - |
| HwpCellPapTssHmm      | chr15 | 25583787 | 25583802 | chr15:25583787:25583802:-:0.000000 | - |
| HwpCellPapTssHmm      | chr15 | 25584104 | 25584107 | chr15:25584104:25584107:-:0.000000 | - |
| HwpCellPapTssHmm      | chr15 | 25584201 | 25584206 | chr15:25584201:25584206:-:0.000001 | - |
| HwpCellPapTssHmm      | chr15 | 25584247 | 25584256 | chr15:25584247:25584256:-:0.000000 | - |
| HwpCellPapTssHmm      | chr15 | 25585284 | 25585367 | chr15:25585284:25585367:-:0.000000 | - |
| Imr90CellPapTssHmm    | chr15 | 25356946 | 25357012 | chr15:25356946:25357012:-:0.000010 | - |
| Imr90CellPapTssHmm    | chr15 | 25360605 | 25360630 | chr15:25360605:25360630:-:0.031079 | - |
| Imr90CellPapTssHmm    | chr15 | 25360791 | 25360802 | chr15:25360791:25360802:-:0.000031 | - |
| Imr90CellPapTssHmm    | chr15 | 25364642 | 25364841 | chr15:25364642:25364841:-:0.000006 | - |
| Imr90CellPapTssHmm    | chr15 | 25414366 | 25414560 | chr15:25414366:25414560:-:0.000046 | - |
| Imr90CellPapTssHmm    | chr15 | 25507642 | 25507649 | chr15:25507642:25507649:-:0.000000 | - |
| Imr90CellPapTssHmm    | chr15 | 25550015 | 25550019 | chr15:25550015:25550019:-:0.000000 | - |
| Imr90CellPapTssHmm    | chr15 | 25579035 | 25579042 | chr15:25579035:25579042:-:0.000000 | - |
| Imr90CellPapTssHmm    | chr15 | 25579775 | 25579785 | chr15:25579775:25579785:-:0.000017 | - |
| Imr90CellPapTssHmm    | chr15 | 25581046 | 25581050 | chr15:25581046:25581050:-:0.000013 | - |
| Imr90CellPapTssHmm    | chr15 | 25581272 | 25581282 | chr15:25581272:25581282:-:0.000036 | - |
| Imr90CellPapTssHmm    | chr15 | 25582421 | 25582423 | chr15:25582421:25582423:-:0.000009 | - |
| Imr90CellPapTssHmm    | chr15 | 25582739 | 25582746 | chr15:25582739:25582746:-:0.000000 | - |
| Imr90CellPapTssHmm    | chr15 | 25583446 | 25583449 | chr15:25583446:25583449:-:0.000010 | - |
| Imr90CellPapTssHmm    | chr15 | 25583787 | 25583804 | chr15:25583787:25583804:-:0.000084 | - |
| Imr90CellPapTssHmm    | chr15 | 25583885 | 25583888 | chr15:25583885:25583888:-:0.000000 | - |
| Imr90CellPapTssHmm    | chr15 | 25584093 | 25584254 | chr15:25584093:25584254:-:0.000000 | - |
| Imr90CellPapTssHmm    | chr15 | 25584317 | 25584320 | chr15:25584317:25584320:-:0.000000 | - |
| Imr90CellPapTssHmm    | chr15 | 25584403 | 25584406 | chr15:25584403:25584406:-:0.000006 | - |
| Imr90CellPapTssHmm    | chr15 | 25585278 | 25585378 | chr15:25585278:25585378:-:0.000039 | - |
| Imr90CytosolPapTssHmm | chr15 | 25356946 | 25357012 | chr15:25356946:25357012:-:0.000010 | - |
| Imr90CytosolPapTssHmm | chr15 | 25360605 | 25360630 | chr15:25360605:25360630:-:0.031079 | - |
| Imr90CytosolPapTssHmm | chr15 | 25364642 | 25364841 | chr15:25364642:25364841:-:0.000006 | - |
| Imr90CytosolPapTssHmm | chr15 | 25365423 | 25365442 | chr15:25365423:25365442:-:0.000031 | - |

|                       |       |          |          |                                    |   |
|-----------------------|-------|----------|----------|------------------------------------|---|
| Imr90CytosolPapTssHmm | chr15 | 25414366 | 25414560 | chr15:25414366:25414560:-:0.000046 | - |
| Imr90CytosolPapTssHmm | chr15 | 25507642 | 25507649 | chr15:25507642:25507649:-:0.000000 | - |
| Imr90CytosolPapTssHmm | chr15 | 25550015 | 25550019 | chr15:25550015:25550019:-:0.000000 | - |
| Imr90CytosolPapTssHmm | chr15 | 25579035 | 25579042 | chr15:25579035:25579042:-:0.000000 | - |
| Imr90CytosolPapTssHmm | chr15 | 25579775 | 25579785 | chr15:25579775:25579785:-:0.000017 | - |
| Imr90CytosolPapTssHmm | chr15 | 25581046 | 25581050 | chr15:25581046:25581050:-:0.000013 | - |
| Imr90CytosolPapTssHmm | chr15 | 25582421 | 25582423 | chr15:25582421:25582423:-:0.000009 | - |
| Imr90CytosolPapTssHmm | chr15 | 25582739 | 25582746 | chr15:25582739:25582746:-:0.000000 | - |
| Imr90CytosolPapTssHmm | chr15 | 25583446 | 25583449 | chr15:25583446:25583449:-:0.000010 | - |
| Imr90CytosolPapTssHmm | chr15 | 25583491 | 25583500 | chr15:25583491:25583500:-:0.000085 | - |
| Imr90CytosolPapTssHmm | chr15 | 25583787 | 25583804 | chr15:25583787:25583804:-:0.000084 | - |
| Imr90CytosolPapTssHmm | chr15 | 25583885 | 25583888 | chr15:25583885:25583888:-:0.000000 | - |
| Imr90CytosolPapTssHmm | chr15 | 25584093 | 25584254 | chr15:25584093:25584254:-:0.000000 | - |
| Imr90CytosolPapTssHmm | chr15 | 25584317 | 25584320 | chr15:25584317:25584320:-:0.000000 | - |
| Imr90CytosolPapTssHmm | chr15 | 25584352 | 25584354 | chr15:25584352:25584354:-:0.000003 | - |
| Imr90CytosolPapTssHmm | chr15 | 25584403 | 25584406 | chr15:25584403:25584406:-:0.000006 | - |
| Imr90CytosolPapTssHmm | chr15 | 25585278 | 25585378 | chr15:25585278:25585378:-:0.000039 | - |
| Imr90NucleusPapTssHmm | chr15 | 25360605 | 25360630 | chr15:25360605:25360630:-:0.031079 | - |
| Imr90NucleusPapTssHmm | chr15 | 25360791 | 25360802 | chr15:25360791:25360802:-:0.000031 | - |
| Imr90NucleusPapTssHmm | chr15 | 25364642 | 25364841 | chr15:25364642:25364841:-:0.000006 | - |
| Imr90NucleusPapTssHmm | chr15 | 25365423 | 25365442 | chr15:25365423:25365442:-:0.000031 | - |
| Imr90NucleusPapTssHmm | chr15 | 25507642 | 25507649 | chr15:25507642:25507649:-:0.000000 | - |
| Imr90NucleusPapTssHmm | chr15 | 25550015 | 25550019 | chr15:25550015:25550019:-:0.000000 | - |
| Imr90NucleusPapTssHmm | chr15 | 25564391 | 25564463 | chr15:25564391:25564463:-:0.000000 | - |
| Imr90NucleusPapTssHmm | chr15 | 25572333 | 25572529 | chr15:25572333:25572529:-:0.000126 | - |
| Imr90NucleusPapTssHmm | chr15 | 25578404 | 25578414 | chr15:25578404:25578414:-:0.015756 | - |
| Imr90NucleusPapTssHmm | chr15 | 25579035 | 25579042 | chr15:25579035:25579042:-:0.000000 | - |
| Imr90NucleusPapTssHmm | chr15 | 25579775 | 25579785 | chr15:25579775:25579785:-:0.000017 | - |
| Imr90NucleusPapTssHmm | chr15 | 25581046 | 25581050 | chr15:25581046:25581050:-:0.000013 | - |
| Imr90NucleusPapTssHmm | chr15 | 25581272 | 25581282 | chr15:25581272:25581282:-:0.000036 | - |

|                       |       |          |          |                                         |   |
|-----------------------|-------|----------|----------|-----------------------------------------|---|
| Imr90NucleusPapTssHmm | chr15 | 25582421 | 25582423 | chr15:25582421:25582423:-:0.000009      | - |
| Imr90NucleusPapTssHmm | chr15 | 25582739 | 25582746 | chr15:25582739:25582746:-:0.000000      | - |
| Imr90NucleusPapTssHmm | chr15 | 25583446 | 25583449 | chr15:25583446:25583449:-:0.000010      | - |
| Imr90NucleusPapTssHmm | chr15 | 25583491 | 25583500 | chr15:25583491:25583500:-:0.000085      | - |
| Imr90NucleusPapTssHmm | chr15 | 25583787 | 25583804 | chr15:25583787:25583804:-:0.000084      | - |
| Imr90NucleusPapTssHmm | chr15 | 25584093 | 25584254 | chr15:25584093:25584254:-:0.000000      | - |
| Imr90NucleusPapTssHmm | chr15 | 25584317 | 25584320 | chr15:25584317:25584320:-:0.000000      | - |
| Imr90NucleusPapTssHmm | chr15 | 25584403 | 25584406 | chr15:25584403:25584406:-:0.000006      | - |
| Imr90NucleusPapTssHmm | chr15 | 25585023 | 25585025 | chr15:25585023:25585025:-:0.000008      | - |
| Imr90NucleusPapTssHmm | chr15 | 25585278 | 25585378 | chr15:25585278:25585378:-:0.000039      | - |
| Imr90NucleusPapTssHmm | chr15 | 25589215 | 25589245 | chr15:25589215:25589245:-:0.000001      | - |
| K562CellPapTssHmm     | chr15 | 25565824 | 25566020 | chr15:25565824:25566020:-:1.05:0.002160 | - |
| K562CellPapTssHmm     | chr15 | 25578917 | 25579040 | chr15:25578917:25579040:-:0.52:0.000000 | - |
| K562CellPapTssHmm     | chr15 | 25579098 | 25579143 | chr15:25579098:25579143:-:0.43:0.000045 | - |
| K562CellPapTssHmm     | chr15 | 25579508 | 25579522 | chr15:25579508:25579522:-:0.03:0.000003 | - |
| K562CellPapTssHmm     | chr15 | 25579557 | 25579670 | chr15:25579557:25579670:-:0.35:0.000040 | - |
| K562CellPapTssHmm     | chr15 | 25579777 | 25579787 | chr15:25579777:25579787:-:0.92:0.000000 | - |
| K562CellPapTssHmm     | chr15 | 25580319 | 25580349 | chr15:25580319:25580349:-:0.02:0.000460 | - |
| K562CellPapTssHmm     | chr15 | 25581040 | 25581190 | chr15:25581040:25581190:-:0.02:0.004859 | - |
| K562CellPapTssHmm     | chr15 | 25582573 | 25582595 | chr15:25582573:25582595:-:0.14:0.000504 | - |
| K562CellPapTssHmm     | chr15 | 25582730 | 25582783 | chr15:25582730:25582783:-:0.03:0.000027 | - |
| K562CellPapTssHmm     | chr15 | 25582912 | 25582922 | chr15:25582912:25582922:-:0.35:0.000001 | - |
| K562CellPapTssHmm     | chr15 | 25582973 | 25582982 | chr15:25582973:25582982:-:0.03:0.000000 | - |
| K562CellPapTssHmm     | chr15 | 25583354 | 25583515 | chr15:25583354:25583515:-:0.12:0.000045 | - |
| K562CellPapTssHmm     | chr15 | 25583787 | 25583804 | chr15:25583787:25583804:-:0.01:0.000031 | - |
| K562CellPapTssHmm     | chr15 | 25583843 | 25583888 | chr15:25583843:25583888:-:0.01:0.000021 | - |
| K562CellPapTssHmm     | chr15 | 25583985 | 25584108 | chr15:25583985:25584108:-:0.45:0.000031 | - |
| K562CellPapTssHmm     | chr15 | 25584162 | 25584165 | chr15:25584162:25584165:-:0.43:0.000000 | - |
| K562CellPapTssHmm     | chr15 | 25584201 | 25584208 | chr15:25584201:25584208:-:0.43:0.000000 | - |
| K562CellPapTssHmm     | chr15 | 25584291 | 25584348 | chr15:25584291:25584348:-:0.10:0.000108 | - |



|                            |       |          |          |                                         |   |
|----------------------------|-------|----------|----------|-----------------------------------------|---|
| K562CellPapTssHmm          | chr15 | 25584403 | 25584406 | chr15:25584403:25584406:-:0.10:0.000012 | - |
| K562CellPapTssHmm          | chr15 | 25585276 | 25585385 | chr15:25585276:25585385:-:1.98:0.000084 | - |
| K562ChromatinTotalTssHmmV3 | chr15 | 25572283 | 25572463 | chr15:25572283:25572463:-:0.38:0.090045 | - |
| K562ChromatinTotalTssHmmV3 | chr15 | 25575265 | 25575417 | chr15:25575265:25575417:-:1.23:0.000067 | - |
| K562ChromatinTotalTssHmmV3 | chr15 | 25577585 | 25577751 | chr15:25577585:25577751:-:0.60:0.000215 | - |
| K562ChromatinTotalTssHmmV3 | chr15 | 25578225 | 25578423 | chr15:25578225:25578423:-:0.01:0.000131 | - |
| K562ChromatinTotalTssHmmV3 | chr15 | 25578917 | 25579040 | chr15:25578917:25579040:-:0.52:0.000000 | - |
| K562ChromatinTotalTssHmmV3 | chr15 | 25580319 | 25580349 | chr15:25580319:25580349:-:0.02:0.000460 | - |
| K562ChromatinTotalTssHmmV3 | chr15 | 25580733 | 25580816 | chr15:25580733:25580816:-:0.28:0.000002 | - |
| K562ChromatinTotalTssHmmV3 | chr15 | 25581040 | 25581190 | chr15:25581040:25581190:-:0.02:0.004859 | - |
| K562ChromatinTotalTssHmmV3 | chr15 | 25581670 | 25581810 | chr15:25581670:25581810:-:0.02:0.000048 | - |
| K562ChromatinTotalTssHmmV3 | chr15 | 25582143 | 25582158 | chr15:25582143:25582158:-:1.01:0.000364 | - |
| K562ChromatinTotalTssHmmV3 | chr15 | 25582628 | 25582650 | chr15:25582628:25582650:-:0.19:0.000001 | - |
| K562ChromatinTotalTssHmmV3 | chr15 | 25582730 | 25582783 | chr15:25582730:25582783:-:0.03:0.000027 | - |
| K562ChromatinTotalTssHmmV3 | chr15 | 25582865 | 25582873 | chr15:25582865:25582873:-:0.71:0.000001 | - |
| K562ChromatinTotalTssHmmV3 | chr15 | 25582912 | 25582922 | chr15:25582912:25582922:-:0.35:0.000001 | - |
| K562ChromatinTotalTssHmmV3 | chr15 | 25582973 | 25582982 | chr15:25582973:25582982:-:0.03:0.000000 | - |
| K562ChromatinTotalTssHmmV3 | chr15 | 25583004 | 25583027 | chr15:25583004:25583027:-:0.11:0.000000 | - |
| K562ChromatinTotalTssHmmV3 | chr15 | 25583041 | 25583050 | chr15:25583041:25583050:-:0.61:0.000000 | - |
| K562ChromatinTotalTssHmmV3 | chr15 | 25583207 | 25583275 | chr15:25583207:25583275:-:0.24:0.000053 | - |
| K562ChromatinTotalTssHmmV3 | chr15 | 25583354 | 25583515 | chr15:25583354:25583515:-:0.12:0.000045 | - |
| K562ChromatinTotalTssHmmV3 | chr15 | 25583650 | 25583696 | chr15:25583650:25583696:-:0.06:0.000894 | - |
| K562ChromatinTotalTssHmmV3 | chr15 | 25583787 | 25583804 | chr15:25583787:25583804:-:0.01:0.000031 | - |
| K562ChromatinTotalTssHmmV3 | chr15 | 25583843 | 25583888 | chr15:25583843:25583888:-:0.01:0.000021 | - |
| K562ChromatinTotalTssHmmV3 | chr15 | 25583985 | 25584108 | chr15:25583985:25584108:-:0.45:0.000031 | - |
| K562ChromatinTotalTssHmmV3 | chr15 | 25584148 | 25584153 | chr15:25584148:25584153:-:0.43:0.000000 | - |
| K562ChromatinTotalTssHmmV3 | chr15 | 25584246 | 25584257 | chr15:25584246:25584257:-:0.10:0.000000 | - |
| K562ChromatinTotalTssHmmV3 | chr15 | 25584291 | 25584348 | chr15:25584291:25584348:-:0.10:0.000108 | - |
| K562ChromatinTotalTssHmmV3 | chr15 | 25585276 | 25585385 | chr15:25585276:25585385:-:1.98:0.000084 | - |
| K562ChromatinTotalTssHmmV3 | chr15 | 25587609 | 25587616 | chr15:25587609:25587616:-:2.84:0.000000 | - |

|                            |       |          |          |                                         |   |
|----------------------------|-------|----------|----------|-----------------------------------------|---|
| K562ChromatinTotalTssHmmV3 | chr15 | 25588241 | 25588313 | chr15:25588241:25588313:-:0.12:0.000038 | - |
| K562CytosolPamTssHmmV2     | chr15 | 25583543 | 25583563 | chr15:25583543:25583563:-:0.51:0.000035 | - |
| K562CytosolPamTssHmmV2     | chr15 | 25583650 | 25583696 | chr15:25583650:25583696:-:0.06:0.000894 | - |
| K562CytosolPamTssHmmV2     | chr15 | 25583843 | 25583888 | chr15:25583843:25583888:-:0.01:0.000021 | - |
| K562CytosolPamTssHmmV2     | chr15 | 25583985 | 25584108 | chr15:25583985:25584108:-:0.45:0.000031 | - |
| K562CytosolPamTssHmmV2     | chr15 | 25584201 | 25584208 | chr15:25584201:25584208:-:0.43:0.000000 | - |
| K562CytosolPamTssHmmV2     | chr15 | 25584246 | 25584257 | chr15:25584246:25584257:-:0.10:0.000000 | - |
| K562CytosolPamTssHmmV2     | chr15 | 25584291 | 25584348 | chr15:25584291:25584348:-:0.10:0.000108 | - |
| K562CytosolPamTssHmmV2     | chr15 | 25585276 | 25585385 | chr15:25585276:25585385:-:1.98:0.000084 | - |
| K562CytosolPapTssHmm       | chr15 | 25578917 | 25579040 | chr15:25578917:25579040:-:0.52:0.000000 | - |
| K562CytosolPapTssHmm       | chr15 | 25579098 | 25579143 | chr15:25579098:25579143:-:0.43:0.000045 | - |
| K562CytosolPapTssHmm       | chr15 | 25579557 | 25579670 | chr15:25579557:25579670:-:0.35:0.000040 | - |
| K562CytosolPapTssHmm       | chr15 | 25579777 | 25579787 | chr15:25579777:25579787:-:0.92:0.000000 | - |
| K562CytosolPapTssHmm       | chr15 | 25581040 | 25581190 | chr15:25581040:25581190:-:0.02:0.004859 | - |
| K562CytosolPapTssHmm       | chr15 | 25582730 | 25582783 | chr15:25582730:25582783:-:0.03:0.000027 | - |
| K562CytosolPapTssHmm       | chr15 | 25583354 | 25583515 | chr15:25583354:25583515:-:0.12:0.000045 | - |
| K562CytosolPapTssHmm       | chr15 | 25583787 | 25583804 | chr15:25583787:25583804:-:0.01:0.000031 | - |
| K562CytosolPapTssHmm       | chr15 | 25583843 | 25583888 | chr15:25583843:25583888:-:0.01:0.000021 | - |
| K562CytosolPapTssHmm       | chr15 | 25583985 | 25584108 | chr15:25583985:25584108:-:0.45:0.000031 | - |
| K562CytosolPapTssHmm       | chr15 | 25584162 | 25584165 | chr15:25584162:25584165:-:0.43:0.000000 | - |
| K562CytosolPapTssHmm       | chr15 | 25584201 | 25584208 | chr15:25584201:25584208:-:0.43:0.000000 | - |
| K562CytosolPapTssHmm       | chr15 | 25584246 | 25584257 | chr15:25584246:25584257:-:0.10:0.000000 | - |
| K562CytosolPapTssHmm       | chr15 | 25584291 | 25584348 | chr15:25584291:25584348:-:0.10:0.000108 | - |
| K562CytosolPapTssHmm       | chr15 | 25585276 | 25585385 | chr15:25585276:25585385:-:1.98:0.000084 | - |
| K562NucleolusTotalTssHmmV3 | chr15 | 25565824 | 25566020 | chr15:25565824:25566020:-:1.05:0.002160 | - |
| K562NucleolusTotalTssHmmV3 | chr15 | 25572283 | 25572463 | chr15:25572283:25572463:-:0.38:0.090045 | - |
| K562NucleolusTotalTssHmmV3 | chr15 | 25574795 | 25574981 | chr15:25574795:25574981:-:0.11:0.000194 | - |
| K562NucleolusTotalTssHmmV3 | chr15 | 25575265 | 25575417 | chr15:25575265:25575417:-:1.23:0.000067 | - |
| K562NucleolusTotalTssHmmV3 | chr15 | 25577585 | 25577751 | chr15:25577585:25577751:-:0.60:0.000215 | - |
| K562NucleolusTotalTssHmmV3 | chr15 | 25578225 | 25578423 | chr15:25578225:25578423:-:0.01:0.000131 | - |

|                              |       |          |          |                                         |   |
|------------------------------|-------|----------|----------|-----------------------------------------|---|
| K562NucleolusTotalTssHmmV3   | chr15 | 25578917 | 25579040 | chr15:25578917:25579040:-:0.52:0.000000 | - |
| K562NucleolusTotalTssHmmV3   | chr15 | 25579557 | 25579670 | chr15:25579557:25579670:-:0.35:0.000040 | - |
| K562NucleolusTotalTssHmmV3   | chr15 | 25580319 | 25580349 | chr15:25580319:25580349:-:0.02:0.000460 | - |
| K562NucleolusTotalTssHmmV3   | chr15 | 25580733 | 25580816 | chr15:25580733:25580816:-:0.28:0.000002 | - |
| K562NucleolusTotalTssHmmV3   | chr15 | 25581040 | 25581190 | chr15:25581040:25581190:-:0.02:0.004859 | - |
| K562NucleolusTotalTssHmmV3   | chr15 | 25581670 | 25581810 | chr15:25581670:25581810:-:0.02:0.000048 | - |
| K562NucleolusTotalTssHmmV3   | chr15 | 25582143 | 25582158 | chr15:25582143:25582158:-:1.01:0.000364 | - |
| K562NucleolusTotalTssHmmV3   | chr15 | 25582573 | 25582595 | chr15:25582573:25582595:-:0.14:0.000504 | - |
| K562NucleolusTotalTssHmmV3   | chr15 | 25582730 | 25582783 | chr15:25582730:25582783:-:0.03:0.000027 | - |
| K562NucleolusTotalTssHmmV3   | chr15 | 25582865 | 25582873 | chr15:25582865:25582873:-:0.71:0.000001 | - |
| K562NucleolusTotalTssHmmV3   | chr15 | 25582912 | 25582922 | chr15:25582912:25582922:-:0.35:0.000001 | - |
| K562NucleolusTotalTssHmmV3   | chr15 | 25582973 | 25582982 | chr15:25582973:25582982:-:0.03:0.000000 | - |
| K562NucleolusTotalTssHmmV3   | chr15 | 25583004 | 25583027 | chr15:25583004:25583027:-:0.11:0.000000 | - |
| K562NucleolusTotalTssHmmV3   | chr15 | 25583041 | 25583050 | chr15:25583041:25583050:-:0.61:0.000000 | - |
| K562NucleolusTotalTssHmmV3   | chr15 | 25583207 | 25583275 | chr15:25583207:25583275:-:0.24:0.000053 | - |
| K562NucleolusTotalTssHmmV3   | chr15 | 25583354 | 25583515 | chr15:25583354:25583515:-:0.12:0.000045 | - |
| K562NucleolusTotalTssHmmV3   | chr15 | 25583543 | 25583563 | chr15:25583543:25583563:-:0.51:0.000035 | - |
| K562NucleolusTotalTssHmmV3   | chr15 | 25583650 | 25583696 | chr15:25583650:25583696:-:0.06:0.000894 | - |
| K562NucleolusTotalTssHmmV3   | chr15 | 25583787 | 25583804 | chr15:25583787:25583804:-:0.01:0.000031 | - |
| K562NucleolusTotalTssHmmV3   | chr15 | 25583843 | 25583888 | chr15:25583843:25583888:-:0.01:0.000021 | - |
| K562NucleolusTotalTssHmmV3   | chr15 | 25583985 | 25584108 | chr15:25583985:25584108:-:0.45:0.000031 | - |
| K562NucleolusTotalTssHmmV3   | chr15 | 25584148 | 25584153 | chr15:25584148:25584153:-:0.43:0.000000 | - |
| K562NucleolusTotalTssHmmV3   | chr15 | 25584291 | 25584348 | chr15:25584291:25584348:-:0.10:0.000108 | - |
| K562NucleolusTotalTssHmmV3   | chr15 | 25585276 | 25585385 | chr15:25585276:25585385:-:1.98:0.000084 | - |
| K562NucleolusTotalTssHmmV3   | chr15 | 25587609 | 25587616 | chr15:25587609:25587616:-:2.84:0.000000 | - |
| K562NucleolusTotalTssHmmV3   | chr15 | 25588241 | 25588313 | chr15:25588241:25588313:-:0.12:0.000038 | - |
| K562NucleoplasmTotalTssHmmV3 | chr15 | 25572283 | 25572463 | chr15:25572283:25572463:-:0.38:0.090045 | - |
| K562NucleoplasmTotalTssHmmV3 | chr15 | 25574795 | 25574981 | chr15:25574795:25574981:-:0.11:0.000194 | - |
| K562NucleoplasmTotalTssHmmV3 | chr15 | 25575265 | 25575417 | chr15:25575265:25575417:-:1.23:0.000067 | - |
| K562NucleoplasmTotalTssHmmV3 | chr15 | 25577585 | 25577751 | chr15:25577585:25577751:-:0.60:0.000215 | - |

|                              |       |          |          |                                         |   |
|------------------------------|-------|----------|----------|-----------------------------------------|---|
| K562NucleoplasmTotalTssHmmV3 | chr15 | 25578225 | 25578423 | chr15:25578225:25578423:-:0.01:0.000131 | - |
| K562NucleoplasmTotalTssHmmV3 | chr15 | 25579098 | 25579143 | chr15:25579098:25579143:-:0.43:0.000045 | - |
| K562NucleoplasmTotalTssHmmV3 | chr15 | 25580733 | 25580816 | chr15:25580733:25580816:-:0.28:0.000002 | - |
| K562NucleoplasmTotalTssHmmV3 | chr15 | 25581040 | 25581190 | chr15:25581040:25581190:-:0.02:0.004859 | - |
| K562NucleoplasmTotalTssHmmV3 | chr15 | 25581670 | 25581810 | chr15:25581670:25581810:-:0.02:0.000048 | - |
| K562NucleoplasmTotalTssHmmV3 | chr15 | 25582143 | 25582158 | chr15:25582143:25582158:-:1.01:0.000364 | - |
| K562NucleoplasmTotalTssHmmV3 | chr15 | 25582573 | 25582595 | chr15:25582573:25582595:-:0.14:0.000504 | - |
| K562NucleoplasmTotalTssHmmV3 | chr15 | 25582628 | 25582650 | chr15:25582628:25582650:-:0.19:0.000001 | - |
| K562NucleoplasmTotalTssHmmV3 | chr15 | 25582730 | 25582783 | chr15:25582730:25582783:-:0.03:0.000027 | - |
| K562NucleoplasmTotalTssHmmV3 | chr15 | 25582865 | 25582873 | chr15:25582865:25582873:-:0.71:0.000001 | - |
| K562NucleoplasmTotalTssHmmV3 | chr15 | 25583041 | 25583050 | chr15:25583041:25583050:-:0.61:0.000000 | - |
| K562NucleoplasmTotalTssHmmV3 | chr15 | 25583207 | 25583275 | chr15:25583207:25583275:-:0.24:0.000053 | - |
| K562NucleoplasmTotalTssHmmV3 | chr15 | 25583354 | 25583515 | chr15:25583354:25583515:-:0.12:0.000045 | - |
| K562NucleoplasmTotalTssHmmV3 | chr15 | 25583543 | 25583563 | chr15:25583543:25583563:-:0.51:0.000035 | - |
| K562NucleoplasmTotalTssHmmV3 | chr15 | 25583650 | 25583696 | chr15:25583650:25583696:-:0.06:0.000894 | - |
| K562NucleoplasmTotalTssHmmV3 | chr15 | 25583787 | 25583804 | chr15:25583787:25583804:-:0.01:0.000031 | - |
| K562NucleoplasmTotalTssHmmV3 | chr15 | 25583843 | 25583888 | chr15:25583843:25583888:-:0.01:0.000021 | - |
| K562NucleoplasmTotalTssHmmV3 | chr15 | 25583985 | 25584108 | chr15:25583985:25584108:-:0.45:0.000031 | - |
| K562NucleoplasmTotalTssHmmV3 | chr15 | 25584162 | 25584165 | chr15:25584162:25584165:-:0.43:0.000000 | - |
| K562NucleoplasmTotalTssHmmV3 | chr15 | 25584246 | 25584257 | chr15:25584246:25584257:-:0.10:0.000000 | - |
| K562NucleoplasmTotalTssHmmV3 | chr15 | 25584291 | 25584348 | chr15:25584291:25584348:-:0.10:0.000108 | - |
| K562NucleoplasmTotalTssHmmV3 | chr15 | 25585276 | 25585385 | chr15:25585276:25585385:-:1.98:0.000084 | - |
| K562NucleoplasmTotalTssHmmV3 | chr15 | 25587609 | 25587616 | chr15:25587609:25587616:-:2.84:0.000000 | - |
| K562NucleoplasmTotalTssHmmV3 | chr15 | 25588241 | 25588313 | chr15:25588241:25588313:-:0.12:0.000038 | - |
| K562NucleusPamTssHmmV2       | chr15 | 25572283 | 25572463 | chr15:25572283:25572463:-:0.38:0.090045 | - |
| K562NucleusPamTssHmmV2       | chr15 | 25574795 | 25574981 | chr15:25574795:25574981:-:0.11:0.000194 | - |
| K562NucleusPamTssHmmV2       | chr15 | 25578225 | 25578423 | chr15:25578225:25578423:-:0.01:0.000131 | - |
| K562NucleusPamTssHmmV2       | chr15 | 25578917 | 25579040 | chr15:25578917:25579040:-:0.52:0.000000 | - |
| K562NucleusPamTssHmmV2       | chr15 | 25579098 | 25579143 | chr15:25579098:25579143:-:0.43:0.000045 | - |
| K562NucleusPamTssHmmV2       | chr15 | 25579557 | 25579670 | chr15:25579557:25579670:-:0.35:0.000040 | - |

|                        |       |          |          |                                         |   |
|------------------------|-------|----------|----------|-----------------------------------------|---|
| K562NucleusPamTssHmmV2 | chr15 | 25580319 | 25580349 | chr15:25580319:25580349:-:0.02:0.000460 | - |
| K562NucleusPamTssHmmV2 | chr15 | 25581670 | 25581810 | chr15:25581670:25581810:-:0.02:0.000048 | - |
| K562NucleusPamTssHmmV2 | chr15 | 25583354 | 25583515 | chr15:25583354:25583515:-:0.12:0.000045 | - |
| K562NucleusPamTssHmmV2 | chr15 | 25583985 | 25584108 | chr15:25583985:25584108:-:0.45:0.000031 | - |
| K562NucleusPamTssHmmV2 | chr15 | 25584162 | 25584165 | chr15:25584162:25584165:-:0.43:0.000000 | - |
| K562NucleusPamTssHmmV2 | chr15 | 25584201 | 25584208 | chr15:25584201:25584208:-:0.43:0.000000 | - |
| K562NucleusPamTssHmmV2 | chr15 | 25584291 | 25584348 | chr15:25584291:25584348:-:0.10:0.000108 | - |
| K562NucleusPamTssHmmV2 | chr15 | 25587609 | 25587616 | chr15:25587609:25587616:-:2.84:0.000000 | - |
| K562NucleusPamTssHmmV2 | chr15 | 25587931 | 25587960 | chr15:25587931:25587960:-:0.14:0.017878 | - |
| K562NucleusPamTssHmmV2 | chr15 | 25588241 | 25588313 | chr15:25588241:25588313:-:0.12:0.000038 | - |
| K562NucleusPapTssHmm   | chr15 | 25565824 | 25566020 | chr15:25565824:25566020:-:1.05:0.002160 | - |
| K562NucleusPapTssHmm   | chr15 | 25578225 | 25578423 | chr15:25578225:25578423:-:0.01:0.000131 | - |
| K562NucleusPapTssHmm   | chr15 | 25578917 | 25579040 | chr15:25578917:25579040:-:0.52:0.000000 | - |
| K562NucleusPapTssHmm   | chr15 | 25579098 | 25579143 | chr15:25579098:25579143:-:0.43:0.000045 | - |
| K562NucleusPapTssHmm   | chr15 | 25579508 | 25579522 | chr15:25579508:25579522:-:0.03:0.000003 | - |
| K562NucleusPapTssHmm   | chr15 | 25579557 | 25579670 | chr15:25579557:25579670:-:0.35:0.000040 | - |
| K562NucleusPapTssHmm   | chr15 | 25579777 | 25579787 | chr15:25579777:25579787:-:0.92:0.000000 | - |
| K562NucleusPapTssHmm   | chr15 | 25580319 | 25580349 | chr15:25580319:25580349:-:0.02:0.000460 | - |
| K562NucleusPapTssHmm   | chr15 | 25581040 | 25581190 | chr15:25581040:25581190:-:0.02:0.004859 | - |
| K562NucleusPapTssHmm   | chr15 | 25581670 | 25581810 | chr15:25581670:25581810:-:0.02:0.000048 | - |
| K562NucleusPapTssHmm   | chr15 | 25582143 | 25582158 | chr15:25582143:25582158:-:1.01:0.000364 | - |
| K562NucleusPapTssHmm   | chr15 | 25582419 | 25582426 | chr15:25582419:25582426:-:0.93:0.000008 | - |
| K562NucleusPapTssHmm   | chr15 | 25582730 | 25582783 | chr15:25582730:25582783:-:0.03:0.000027 | - |
| K562NucleusPapTssHmm   | chr15 | 25583004 | 25583027 | chr15:25583004:25583027:-:0.11:0.000000 | - |
| K562NucleusPapTssHmm   | chr15 | 25583354 | 25583515 | chr15:25583354:25583515:-:0.12:0.000045 | - |
| K562NucleusPapTssHmm   | chr15 | 25583650 | 25583696 | chr15:25583650:25583696:-:0.06:0.000894 | - |
| K562NucleusPapTssHmm   | chr15 | 25583787 | 25583804 | chr15:25583787:25583804:-:0.01:0.000031 | - |
| K562NucleusPapTssHmm   | chr15 | 25583843 | 25583888 | chr15:25583843:25583888:-:0.01:0.000021 | - |
| K562NucleusPapTssHmm   | chr15 | 25583985 | 25584108 | chr15:25583985:25584108:-:0.45:0.000031 | - |
| K562NucleusPapTssHmm   | chr15 | 25584162 | 25584165 | chr15:25584162:25584165:-:0.43:0.000000 | - |

|                         |       |          |          |                                         |   |
|-------------------------|-------|----------|----------|-----------------------------------------|---|
| K562NucleusPapTssHmm    | chr15 | 25584201 | 25584208 | chr15:25584201:25584208:-:0.43:0.000000 | - |
| K562NucleusPapTssHmm    | chr15 | 25584246 | 25584257 | chr15:25584246:25584257:-:0.10:0.000000 | - |
| K562NucleusPapTssHmm    | chr15 | 25584291 | 25584348 | chr15:25584291:25584348:-:0.10:0.000108 | - |
| K562NucleusPapTssHmm    | chr15 | 25584403 | 25584406 | chr15:25584403:25584406:-:0.10:0.000012 | - |
| K562NucleusPapTssHmm    | chr15 | 25585276 | 25585385 | chr15:25585276:25585385:-:1.98:0.000084 | - |
| K562PolysomePamTssHmmV2 | chr15 | 25565824 | 25566020 | chr15:25565824:25566020:-:1.05:0.002160 | - |
| K562PolysomePamTssHmmV2 | chr15 | 25572283 | 25572463 | chr15:25572283:25572463:-:0.38:0.090045 | - |
| K562PolysomePamTssHmmV2 | chr15 | 25575265 | 25575417 | chr15:25575265:25575417:-:1.23:0.000067 | - |
| K562PolysomePamTssHmmV2 | chr15 | 25577585 | 25577751 | chr15:25577585:25577751:-:0.60:0.000215 | - |
| K562PolysomePamTssHmmV2 | chr15 | 25580733 | 25580816 | chr15:25580733:25580816:-:0.28:0.000002 | - |
| K562PolysomePamTssHmmV2 | chr15 | 25581040 | 25581190 | chr15:25581040:25581190:-:0.02:0.004859 | - |
| K562PolysomePamTssHmmV2 | chr15 | 25581670 | 25581810 | chr15:25581670:25581810:-:0.02:0.000048 | - |
| K562PolysomePamTssHmmV2 | chr15 | 25582143 | 25582158 | chr15:25582143:25582158:-:1.01:0.000364 | - |
| K562PolysomePamTssHmmV2 | chr15 | 25582573 | 25582595 | chr15:25582573:25582595:-:0.14:0.000504 | - |
| K562PolysomePamTssHmmV2 | chr15 | 25582628 | 25582650 | chr15:25582628:25582650:-:0.19:0.000001 | - |
| K562PolysomePamTssHmmV2 | chr15 | 25582730 | 25582783 | chr15:25582730:25582783:-:0.03:0.000027 | - |
| K562PolysomePamTssHmmV2 | chr15 | 25582865 | 25582873 | chr15:25582865:25582873:-:0.71:0.000001 | - |
| K562PolysomePamTssHmmV2 | chr15 | 25582973 | 25582982 | chr15:25582973:25582982:-:0.03:0.000000 | - |
| K562PolysomePamTssHmmV2 | chr15 | 25583041 | 25583050 | chr15:25583041:25583050:-:0.61:0.000000 | - |
| K562PolysomePamTssHmmV2 | chr15 | 25583207 | 25583275 | chr15:25583207:25583275:-:0.24:0.000053 | - |
| K562PolysomePamTssHmmV2 | chr15 | 25583354 | 25583515 | chr15:25583354:25583515:-:0.12:0.000045 | - |
| K562PolysomePamTssHmmV2 | chr15 | 25583543 | 25583563 | chr15:25583543:25583563:-:0.51:0.000035 | - |
| K562PolysomePamTssHmmV2 | chr15 | 25583650 | 25583696 | chr15:25583650:25583696:-:0.06:0.000894 | - |
| K562PolysomePamTssHmmV2 | chr15 | 25583787 | 25583804 | chr15:25583787:25583804:-:0.01:0.000031 | - |
| K562PolysomePamTssHmmV2 | chr15 | 25583843 | 25583888 | chr15:25583843:25583888:-:0.01:0.000021 | - |
| K562PolysomePamTssHmmV2 | chr15 | 25583985 | 25584108 | chr15:25583985:25584108:-:0.45:0.000031 | - |
| K562PolysomePamTssHmmV2 | chr15 | 25584201 | 25584208 | chr15:25584201:25584208:-:0.43:0.000000 | - |
| K562PolysomePamTssHmmV2 | chr15 | 25584291 | 25584348 | chr15:25584291:25584348:-:0.10:0.000108 | - |
| K562PolysomePamTssHmmV2 | chr15 | 25585276 | 25585385 | chr15:25585276:25585385:-:1.98:0.000084 | - |
| Mcf7CellPapTssHmm       | chr15 | 25579035 | 25579042 | chr15:25579035:25579042:-:4.22:0.000000 | - |

|                      |       |          |          |                                         |   |
|----------------------|-------|----------|----------|-----------------------------------------|---|
| Mcf7CellPapTssHmm    | chr15 | 25579517 | 25579670 | chr15:25579517:25579670:-:0.30:0.000040 | - |
| Mcf7CellPapTssHmm    | chr15 | 25582420 | 25582575 | chr15:25582420:25582575:-:0.03:0.000470 | - |
| Mcf7CellPapTssHmm    | chr15 | 25582733 | 25582746 | chr15:25582733:25582746:-:1.00:0.000032 | - |
| Mcf7CellPapTssHmm    | chr15 | 25582970 | 25583049 | chr15:25582970:25583049:-:0.73:0.000000 | - |
| Mcf7CellPapTssHmm    | chr15 | 25583397 | 25583565 | chr15:25583397:25583565:-:0.01:0.000008 | - |
| Mcf7CellPapTssHmm    | chr15 | 25583788 | 25583804 | chr15:25583788:25583804:-:1.32:0.000031 | - |
| Mcf7CellPapTssHmm    | chr15 | 25583985 | 25583993 | chr15:25583985:25583993:-:1.36:0.000001 | - |
| Mcf7CellPapTssHmm    | chr15 | 25584093 | 25584211 | chr15:25584093:25584211:-:0.53:0.000000 | - |
| Mcf7CellPapTssHmm    | chr15 | 25584318 | 25584362 | chr15:25584318:25584362:-:0.87:0.000559 | - |
| Mcf7CellPapTssHmm    | chr15 | 25585277 | 25585378 | chr15:25585277:25585378:-:1.66:0.000062 | - |
| Mcf7CytosolPapTssHmm | chr15 | 25414365 | 25414564 | chr15:25414365:25414564:-:0.000006      | - |
| Mcf7CytosolPapTssHmm | chr15 | 25507642 | 25507649 | chr15:25507642:25507649:-:0.000000      | - |
| Mcf7CytosolPapTssHmm | chr15 | 25550016 | 25550065 | chr15:25550016:25550065:-:0.000000      | - |
| Mcf7CytosolPapTssHmm | chr15 | 25579014 | 25579045 | chr15:25579014:25579045:-:0.000000      | - |
| Mcf7CytosolPapTssHmm | chr15 | 25582421 | 25582424 | chr15:25582421:25582424:-:0.000000      | - |
| Mcf7CytosolPapTssHmm | chr15 | 25582740 | 25582774 | chr15:25582740:25582774:-:0.000000      | - |
| Mcf7CytosolPapTssHmm | chr15 | 25583785 | 25583795 | chr15:25583785:25583795:-:0.000013      | - |
| Mcf7CytosolPapTssHmm | chr15 | 25583986 | 25583993 | chr15:25583986:25583993:-:0.000000      | - |
| Mcf7CytosolPapTssHmm | chr15 | 25584094 | 25584211 | chr15:25584094:25584211:-:0.000301      | - |
| Mcf7CytosolPapTssHmm | chr15 | 25584247 | 25584256 | chr15:25584247:25584256:-:0.000000      | - |
| Mcf7CytosolPapTssHmm | chr15 | 25585230 | 25585377 | chr15:25585230:25585377:-:0.000011      | - |
| Mcf7NucleusPapTssHmm | chr15 | 25550016 | 25550065 | chr15:25550016:25550065:-:0.000000      | - |
| Mcf7NucleusPapTssHmm | chr15 | 25550322 | 25550333 | chr15:25550322:25550333:-:0.000000      | - |
| Mcf7NucleusPapTssHmm | chr15 | 25578404 | 25578447 | chr15:25578404:25578447:-:0.000023      | - |
| Mcf7NucleusPapTssHmm | chr15 | 25579014 | 25579045 | chr15:25579014:25579045:-:0.000000      | - |
| Mcf7NucleusPapTssHmm | chr15 | 25582421 | 25582424 | chr15:25582421:25582424:-:0.000000      | - |
| Mcf7NucleusPapTssHmm | chr15 | 25582740 | 25582774 | chr15:25582740:25582774:-:0.000000      | - |
| Mcf7NucleusPapTssHmm | chr15 | 25583785 | 25583795 | chr15:25583785:25583795:-:0.000013      | - |
| Mcf7NucleusPapTssHmm | chr15 | 25584094 | 25584211 | chr15:25584094:25584211:-:0.000301      | - |
| Mcf7NucleusPapTssHmm | chr15 | 25584247 | 25584256 | chr15:25584247:25584256:-:0.000000      | - |

|                        |       |          |          |                                         |   |
|------------------------|-------|----------|----------|-----------------------------------------|---|
| Mcf7NucleusPapTssHmm   | chr15 | 25585230 | 25585377 | chr15:25585230:25585377:-:0.000011      | - |
| Mcf7NucleusPapTssHmm   | chr15 | 25590681 | 25590708 | chr15:25590681:25590708:-:0.000000      | - |
| Monocd14CellPapTssHmm  | chr15 | 25507642 | 25507649 | chr15:25507642:25507649:-:0.000005      | - |
| Monocd14CellPapTssHmm  | chr15 | 25582419 | 25582446 | chr15:25582419:25582446:-:0.000001      | - |
| Monocd14CellPapTssHmm  | chr15 | 25583788 | 25583794 | chr15:25583788:25583794:-:0.000298      | - |
| Monocd14CellPapTssHmm  | chr15 | 25584094 | 25584253 | chr15:25584094:25584253:-:0.005615      | - |
| Monocd14CellPapTssHmm  | chr15 | 25585276 | 25585378 | chr15:25585276:25585378:-:0.000253      | - |
| NhdfCellPapTssHmm      | chr15 | 25507642 | 25507649 | chr15:25507642:25507649:-:0.000000      | - |
| NhdfCellPapTssHmm      | chr15 | 25582421 | 25582450 | chr15:25582421:25582450:-:0.000000      | - |
| NhdfCellPapTssHmm      | chr15 | 25584095 | 25584209 | chr15:25584095:25584209:-:0.000000      | - |
| NhdfCellPapTssHmm      | chr15 | 25585282 | 25585381 | chr15:25585282:25585381:-:0.000000      | - |
| NhekCellPapTssHmm      | chr15 | 25564475 | 25564611 | chr15:25564475:25564611:-:0.64:0.000005 | - |
| NhekCellPapTssHmm      | chr15 | 25565913 | 25566020 | chr15:25565913:25566020:-:0.68:0.002160 | - |
| NhekCellPapTssHmm      | chr15 | 25578210 | 25578320 | chr15:25578210:25578320:-:0.61:0.000466 | - |
| NhekCellPapTssHmm      | chr15 | 25578912 | 25579039 | chr15:25578912:25579039:-:0.18:0.000000 | - |
| NhekCellPapTssHmm      | chr15 | 25582722 | 25582746 | chr15:25582722:25582746:-:0.48:0.000032 | - |
| NhekCellPapTssHmm      | chr15 | 25583445 | 25583508 | chr15:25583445:25583508:-:0.40:0.000051 | - |
| NhekCellPapTssHmm      | chr15 | 25583783 | 25583804 | chr15:25583783:25583804:-:1.10:0.000031 | - |
| NhekCellPapTssHmm      | chr15 | 25583985 | 25584000 | chr15:25583985:25584000:-:0.53:0.000010 | - |
| NhekCellPapTssHmm      | chr15 | 25584094 | 25584214 | chr15:25584094:25584214:-:0.61:0.000001 | - |
| NhekCellPapTssHmm      | chr15 | 25584246 | 25584253 | chr15:25584246:25584253:-:0.77:0.000000 | - |
| NhekCellPapTssHmm      | chr15 | 25584289 | 25584295 | chr15:25584289:25584295:-:0.03:0.000000 | - |
| NhekCellPapTssHmm      | chr15 | 25584314 | 25584354 | chr15:25584314:25584354:-:0.11:0.000240 | - |
| NhekCellPapTssHmm      | chr15 | 25585265 | 25585377 | chr15:25585265:25585377:-:0.65:0.000103 | - |
| NhekCytosolPamTssHmmV2 | chr15 | 25550012 | 25550017 | chr15:25550012:25550017:-:7.02:0.000001 | - |
| NhekCytosolPamTssHmmV2 | chr15 | 25565913 | 25566020 | chr15:25565913:25566020:-:0.68:0.002160 | - |
| NhekCytosolPamTssHmmV2 | chr15 | 25578912 | 25579039 | chr15:25578912:25579039:-:0.18:0.000000 | - |
| NhekCytosolPamTssHmmV2 | chr15 | 25582913 | 25583035 | chr15:25582913:25583035:-:0.08:0.000000 | - |
| NhekCytosolPamTssHmmV2 | chr15 | 25583445 | 25583508 | chr15:25583445:25583508:-:0.40:0.000051 | - |
| NhekCytosolPamTssHmmV2 | chr15 | 25583783 | 25583804 | chr15:25583783:25583804:-:1.10:0.000031 | - |



|                        |       |          |          |                                         |   |
|------------------------|-------|----------|----------|-----------------------------------------|---|
| NhekCytosolPamTssHmmV2 | chr15 | 25583985 | 25584000 | chr15:25583985:25584000:-:0.53:0.000010 | - |
| NhekCytosolPamTssHmmV2 | chr15 | 25584055 | 25584062 | chr15:25584055:25584062:-:0.16:0.000092 | - |
| NhekCytosolPamTssHmmV2 | chr15 | 25584094 | 25584214 | chr15:25584094:25584214:-:0.61:0.000001 | - |
| NhekCytosolPamTssHmmV2 | chr15 | 25584222 | 25584224 | chr15:25584222:25584224:-:1.61:0.000000 | - |
| NhekCytosolPamTssHmmV2 | chr15 | 25584314 | 25584354 | chr15:25584314:25584354:-:0.11:0.000240 | - |
| NhekCytosolPamTssHmmV2 | chr15 | 25584395 | 25584410 | chr15:25584395:25584410:-:0.14:0.000015 | - |
| NhekCytosolPamTssHmmV2 | chr15 | 25585265 | 25585377 | chr15:25585265:25585377:-:0.65:0.000103 | - |
| NhekCytosolPapTssHmm   | chr15 | 25578912 | 25579039 | chr15:25578912:25579039:-:0.18:0.000000 | - |
| NhekCytosolPapTssHmm   | chr15 | 25579777 | 25579791 | chr15:25579777:25579791:-:2.81:0.000001 | - |
| NhekCytosolPapTssHmm   | chr15 | 25581271 | 25581280 | chr15:25581271:25581280:-:2.75:0.002498 | - |
| NhekCytosolPapTssHmm   | chr15 | 25582722 | 25582746 | chr15:25582722:25582746:-:0.48:0.000032 | - |
| NhekCytosolPapTssHmm   | chr15 | 25582913 | 25583035 | chr15:25582913:25583035:-:0.08:0.000000 | - |
| NhekCytosolPapTssHmm   | chr15 | 25583445 | 25583508 | chr15:25583445:25583508:-:0.40:0.000051 | - |
| NhekCytosolPapTssHmm   | chr15 | 25583783 | 25583804 | chr15:25583783:25583804:-:1.10:0.000031 | - |
| NhekCytosolPapTssHmm   | chr15 | 25583985 | 25584000 | chr15:25583985:25584000:-:0.53:0.000010 | - |
| NhekCytosolPapTssHmm   | chr15 | 25584055 | 25584062 | chr15:25584055:25584062:-:0.16:0.000092 | - |
| NhekCytosolPapTssHmm   | chr15 | 25584094 | 25584214 | chr15:25584094:25584214:-:0.61:0.000001 | - |
| NhekCytosolPapTssHmm   | chr15 | 25584246 | 25584253 | chr15:25584246:25584253:-:0.77:0.000000 | - |
| NhekCytosolPapTssHmm   | chr15 | 25584289 | 25584295 | chr15:25584289:25584295:-:0.03:0.000000 | - |
| NhekCytosolPapTssHmm   | chr15 | 25584314 | 25584354 | chr15:25584314:25584354:-:0.11:0.000240 | - |
| NhekCytosolPapTssHmm   | chr15 | 25584395 | 25584410 | chr15:25584395:25584410:-:0.14:0.000015 | - |
| NhekCytosolPapTssHmm   | chr15 | 25585265 | 25585377 | chr15:25585265:25585377:-:0.65:0.000103 | - |
| NhekNucleusPamTssHmmV2 | chr15 | 25550012 | 25550017 | chr15:25550012:25550017:-:7.02:0.000001 | - |
| NhekNucleusPamTssHmmV2 | chr15 | 25562964 | 25563104 | chr15:25562964:25563104:-:1.10:0.000001 | - |
| NhekNucleusPamTssHmmV2 | chr15 | 25564475 | 25564611 | chr15:25564475:25564611:-:0.64:0.000005 | - |
| NhekNucleusPamTssHmmV2 | chr15 | 25565913 | 25566020 | chr15:25565913:25566020:-:0.68:0.002160 | - |
| NhekNucleusPamTssHmmV2 | chr15 | 25566216 | 25566347 | chr15:25566216:25566347:-:0.16:0.000045 | - |
| NhekNucleusPamTssHmmV2 | chr15 | 25566594 | 25566662 | chr15:25566594:25566662:-:1.03:0.000709 | - |
| NhekNucleusPamTssHmmV2 | chr15 | 25567896 | 25567945 | chr15:25567896:25567945:-:1.31:0.001122 | - |
| NhekNucleusPamTssHmmV2 | chr15 | 25569062 | 25569257 | chr15:25569062:25569257:-:0.42:0.001396 | - |

|                        |       |          |          |                                         |   |
|------------------------|-------|----------|----------|-----------------------------------------|---|
| NhekNucleusPamTssHmmV2 | chr15 | 25572226 | 25572354 | chr15:25572226:25572354:-:0.22:0.000107 | - |
| NhekNucleusPamTssHmmV2 | chr15 | 25578030 | 25578056 | chr15:25578030:25578056:-:0.59:0.000016 | - |
| NhekNucleusPamTssHmmV2 | chr15 | 25578210 | 25578320 | chr15:25578210:25578320:-:0.61:0.000466 | - |
| NhekNucleusPamTssHmmV2 | chr15 | 25578399 | 25578429 | chr15:25578399:25578429:-:0.54:0.000149 | - |
| NhekNucleusPamTssHmmV2 | chr15 | 25578912 | 25579039 | chr15:25578912:25579039:-:0.18:0.000000 | - |
| NhekNucleusPamTssHmmV2 | chr15 | 25579777 | 25579791 | chr15:25579777:25579791:-:2.81:0.000001 | - |
| NhekNucleusPamTssHmmV2 | chr15 | 25581271 | 25581280 | chr15:25581271:25581280:-:2.75:0.002498 | - |
| NhekNucleusPamTssHmmV2 | chr15 | 25582419 | 25582454 | chr15:25582419:25582454:-:0.82:0.000097 | - |
| NhekNucleusPamTssHmmV2 | chr15 | 25582722 | 25582746 | chr15:25582722:25582746:-:0.48:0.000032 | - |
| NhekNucleusPamTssHmmV2 | chr15 | 25582913 | 25583035 | chr15:25582913:25583035:-:0.08:0.000000 | - |
| NhekNucleusPamTssHmmV2 | chr15 | 25583445 | 25583508 | chr15:25583445:25583508:-:0.40:0.000051 | - |
| NhekNucleusPamTssHmmV2 | chr15 | 25583783 | 25583804 | chr15:25583783:25583804:-:1.10:0.000031 | - |
| NhekNucleusPamTssHmmV2 | chr15 | 25583971 | 25583977 | chr15:25583971:25583977:-:0.05:0.000000 | - |
| NhekNucleusPamTssHmmV2 | chr15 | 25583985 | 25584000 | chr15:25583985:25584000:-:0.53:0.000010 | - |
| NhekNucleusPamTssHmmV2 | chr15 | 25584055 | 25584062 | chr15:25584055:25584062:-:0.16:0.000092 | - |
| NhekNucleusPamTssHmmV2 | chr15 | 25584094 | 25584214 | chr15:25584094:25584214:-:0.61:0.000001 | - |
| NhekNucleusPamTssHmmV2 | chr15 | 25584222 | 25584224 | chr15:25584222:25584224:-:1.61:0.000000 | - |
| NhekNucleusPamTssHmmV2 | chr15 | 25584289 | 25584295 | chr15:25584289:25584295:-:0.03:0.000000 | - |
| NhekNucleusPamTssHmmV2 | chr15 | 25584314 | 25584354 | chr15:25584314:25584354:-:0.11:0.000240 | - |
| NhekNucleusPamTssHmmV2 | chr15 | 25584395 | 25584410 | chr15:25584395:25584410:-:0.14:0.000015 | - |
| NhekNucleusPamTssHmmV2 | chr15 | 25585265 | 25585377 | chr15:25585265:25585377:-:0.65:0.000103 | - |
| NhekNucleusPamTssHmmV2 | chr15 | 25588545 | 25588579 | chr15:25588545:25588579:-:0.03:0.000001 | - |
| NhekNucleusPamTssHmmV2 | chr15 | 25588725 | 25588796 | chr15:25588725:25588796:-:0.65:0.000000 | - |
| NhekNucleusPapTssHmmV2 | chr15 | 25550012 | 25550017 | chr15:25550012:25550017:-:7.02:0.000001 | - |
| NhekNucleusPapTssHmmV2 | chr15 | 25562964 | 25563104 | chr15:25562964:25563104:-:1.10:0.000001 | - |
| NhekNucleusPapTssHmmV2 | chr15 | 25564475 | 25564611 | chr15:25564475:25564611:-:0.64:0.000005 | - |
| NhekNucleusPapTssHmmV2 | chr15 | 25565913 | 25566020 | chr15:25565913:25566020:-:0.68:0.002160 | - |
| NhekNucleusPapTssHmmV2 | chr15 | 25566216 | 25566347 | chr15:25566216:25566347:-:0.16:0.000045 | - |
| NhekNucleusPapTssHmmV2 | chr15 | 25566594 | 25566662 | chr15:25566594:25566662:-:1.03:0.000709 | - |
| NhekNucleusPapTssHmmV2 | chr15 | 25569062 | 25569257 | chr15:25569062:25569257:-:0.42:0.001396 | - |

|                        |       |          |          |                                         |   |
|------------------------|-------|----------|----------|-----------------------------------------|---|
| NhekNucleusPapTssHmmV2 | chr15 | 25572226 | 25572354 | chr15:25572226:25572354:-:0.22:0.000107 | - |
| NhekNucleusPapTssHmmV2 | chr15 | 25578030 | 25578056 | chr15:25578030:25578056:-:0.59:0.000016 | - |
| NhekNucleusPapTssHmmV2 | chr15 | 25578210 | 25578320 | chr15:25578210:25578320:-:0.61:0.000466 | - |
| NhekNucleusPapTssHmmV2 | chr15 | 25578399 | 25578429 | chr15:25578399:25578429:-:0.54:0.000149 | - |
| NhekNucleusPapTssHmmV2 | chr15 | 25578912 | 25579039 | chr15:25578912:25579039:-:0.18:0.000000 | - |
| NhekNucleusPapTssHmmV2 | chr15 | 25579777 | 25579791 | chr15:25579777:25579791:-:2.81:0.000001 | - |
| NhekNucleusPapTssHmmV2 | chr15 | 25581271 | 25581280 | chr15:25581271:25581280:-:2.75:0.002498 | - |
| NhekNucleusPapTssHmmV2 | chr15 | 25582419 | 25582454 | chr15:25582419:25582454:-:0.82:0.000097 | - |
| NhekNucleusPapTssHmmV2 | chr15 | 25582722 | 25582746 | chr15:25582722:25582746:-:0.48:0.000032 | - |
| NhekNucleusPapTssHmmV2 | chr15 | 25582913 | 25583035 | chr15:25582913:25583035:-:0.08:0.000000 | - |
| NhekNucleusPapTssHmmV2 | chr15 | 25583445 | 25583508 | chr15:25583445:25583508:-:0.40:0.000051 | - |
| NhekNucleusPapTssHmmV2 | chr15 | 25583783 | 25583804 | chr15:25583783:25583804:-:1.10:0.000031 | - |
| NhekNucleusPapTssHmmV2 | chr15 | 25583971 | 25583977 | chr15:25583971:25583977:-:0.05:0.000000 | - |
| NhekNucleusPapTssHmmV2 | chr15 | 25583985 | 25584000 | chr15:25583985:25584000:-:0.53:0.000010 | - |
| NhekNucleusPapTssHmmV2 | chr15 | 25584055 | 25584062 | chr15:25584055:25584062:-:0.16:0.000092 | - |
| NhekNucleusPapTssHmmV2 | chr15 | 25584094 | 25584214 | chr15:25584094:25584214:-:0.61:0.000001 | - |
| NhekNucleusPapTssHmmV2 | chr15 | 25584222 | 25584224 | chr15:25584222:25584224:-:1.61:0.000000 | - |
| NhekNucleusPapTssHmmV2 | chr15 | 25584246 | 25584253 | chr15:25584246:25584253:-:0.77:0.000000 | - |
| NhekNucleusPapTssHmmV2 | chr15 | 25584289 | 25584295 | chr15:25584289:25584295:-:0.03:0.000000 | - |
| NhekNucleusPapTssHmmV2 | chr15 | 25584314 | 25584354 | chr15:25584314:25584354:-:0.11:0.000240 | - |
| NhekNucleusPapTssHmmV2 | chr15 | 25584395 | 25584410 | chr15:25584395:25584410:-:0.14:0.000015 | - |
| NhekNucleusPapTssHmmV2 | chr15 | 25585265 | 25585377 | chr15:25585265:25585377:-:0.65:0.000103 | - |
| NhekNucleusPapTssHmmV2 | chr15 | 25588725 | 25588796 | chr15:25588725:25588796:-:0.65:0.000000 | - |
| NhekNucleusPapTssHmmV3 | chr15 | 25582419 | 25582443 | chr15:25582419:25582443:-:0.000577      | - |
| NhekNucleusPapTssHmmV3 | chr15 | 25582735 | 25582745 | chr15:25582735:25582745:-:0.000012      | - |
| NhekNucleusPapTssHmmV3 | chr15 | 25583784 | 25583794 | chr15:25583784:25583794:-:0.000667      | - |
| NhekNucleusPapTssHmmV3 | chr15 | 25583985 | 25583993 | chr15:25583985:25583993:-:0.000060      | - |
| NhekNucleusPapTssHmmV3 | chr15 | 25584094 | 25584096 | chr15:25584094:25584096:-:0.000000      | - |
| NhekNucleusPapTssHmmV3 | chr15 | 25584104 | 25584106 | chr15:25584104:25584106:-:0.000000      | - |
| NhekNucleusPapTssHmmV3 | chr15 | 25584160 | 25584163 | chr15:25584160:25584163:-:0.000000      | - |

|                        |       |          |          |                                    |   |
|------------------------|-------|----------|----------|------------------------------------|---|
| NhekNucleusPapTssHmmV3 | chr15 | 25584201 | 25584203 | chr15:25584201:25584203:-:0.000000 | - |
| NhekNucleusPapTssHmmV3 | chr15 | 25584316 | 25584320 | chr15:25584316:25584320:-:0.000000 | - |
| NhekNucleusPapTssHmmV3 | chr15 | 25585276 | 25585377 | chr15:25585276:25585377:-:0.000005 | - |
| Nhemfm2CellPapTssHmm   | chr15 | 25414366 | 25414438 | chr15:25414366:25414438:-:0.000359 | - |
| Nhemfm2CellPapTssHmm   | chr15 | 25550015 | 25550018 | chr15:25550015:25550018:-:0.000098 | - |
| Nhemfm2CellPapTssHmm   | chr15 | 25582421 | 25582424 | chr15:25582421:25582424:-:0.000018 | - |
| Nhemfm2CellPapTssHmm   | chr15 | 25583988 | 25583994 | chr15:25583988:25583994:-:0.000001 | - |
| Nhemfm2CellPapTssHmm   | chr15 | 25584105 | 25584109 | chr15:25584105:25584109:-:0.000001 | - |
| Nhemfm2CellPapTssHmm   | chr15 | 25584161 | 25584165 | chr15:25584161:25584165:-:0.000000 | - |
| Nhemfm2CellPapTssHmm   | chr15 | 25585282 | 25585288 | chr15:25585282:25585288:-:0.000041 | - |
| Nhemm2CellPapTssHmm    | chr15 | 25550016 | 25550059 | chr15:25550016:25550059:-:0.000000 | - |
| Nhemm2CellPapTssHmm    | chr15 | 25582421 | 25582424 | chr15:25582421:25582424:-:0.000055 | - |
| Nhemm2CellPapTssHmm    | chr15 | 25582740 | 25582745 | chr15:25582740:25582745:-:0.000000 | - |
| Nhemm2CellPapTssHmm    | chr15 | 25583790 | 25583792 | chr15:25583790:25583792:-:0.000019 | - |
| Nhemm2CellPapTssHmm    | chr15 | 25584104 | 25584106 | chr15:25584104:25584106:-:0.000110 | - |
| Nhemm2CellPapTssHmm    | chr15 | 25584162 | 25584164 | chr15:25584162:25584164:-:0.000027 | - |
| Nhemm2CellPapTssHmm    | chr15 | 25584316 | 25584319 | chr15:25584316:25584319:-:0.000010 | - |
| Nhemm2CellPapTssHmm    | chr15 | 25584404 | 25584408 | chr15:25584404:25584408:-:0.000016 | - |
| Nhemm2CellPapTssHmm    | chr15 | 25585276 | 25585377 | chr15:25585276:25585377:-:0.000095 | - |
| SkmcCellPapTssHmm      | chr15 | 25414366 | 25414564 | chr15:25414366:25414564:-:0.000008 | - |
| SkmcCellPapTssHmm      | chr15 | 25507641 | 25507649 | chr15:25507641:25507649:-:0.000000 | - |
| SkmcCellPapTssHmm      | chr15 | 25579030 | 25579118 | chr15:25579030:25579118:-:0.000000 | - |
| SkmcCellPapTssHmm      | chr15 | 25583790 | 25583795 | chr15:25583790:25583795:-:0.000000 | - |
| SkmcCellPapTssHmm      | chr15 | 25584104 | 25584106 | chr15:25584104:25584106:-:0.000000 | - |
| SkmcCellPapTssHmm      | chr15 | 25584201 | 25584212 | chr15:25584201:25584212:-:0.000287 | - |
| SkmcCellPapTssHmm      | chr15 | 25584249 | 25584251 | chr15:25584249:25584251:-:0.000000 | - |
| SkmcCellPapTssHmm      | chr15 | 25584314 | 25584320 | chr15:25584314:25584320:-:0.000000 | - |
| SkmcCellPapTssHmm      | chr15 | 25585276 | 25585383 | chr15:25585276:25585383:-:0.000000 | - |
| SknshCellPapTssHmm     | chr15 | 25414365 | 25414564 | chr15:25414365:25414564:-:0.000016 | - |
| SknshCellPapTssHmm     | chr15 | 25507642 | 25507649 | chr15:25507642:25507649:-:0.000001 | - |

|                       |       |          |          |                                    |   |
|-----------------------|-------|----------|----------|------------------------------------|---|
| SknshCellPapTssHmm    | chr15 | 25550015 | 25550018 | chr15:25550015:25550018:-:0.000000 | - |
| SknshCellPapTssHmm    | chr15 | 25578407 | 25578414 | chr15:25578407:25578414:-:0.000518 | - |
| SknshCellPapTssHmm    | chr15 | 25579029 | 25579044 | chr15:25579029:25579044:-:0.000000 | - |
| SknshCellPapTssHmm    | chr15 | 25579514 | 25579521 | chr15:25579514:25579521:-:0.000000 | - |
| SknshCellPapTssHmm    | chr15 | 25579572 | 25579577 | chr15:25579572:25579577:-:0.000000 | - |
| SknshCellPapTssHmm    | chr15 | 25579777 | 25579785 | chr15:25579777:25579785:-:0.000000 | - |
| SknshCellPapTssHmm    | chr15 | 25580264 | 25580345 | chr15:25580264:25580345:-:0.000186 | - |
| SknshCellPapTssHmm    | chr15 | 25581271 | 25581283 | chr15:25581271:25581283:-:0.000639 | - |
| SknshCellPapTssHmm    | chr15 | 25582420 | 25582426 | chr15:25582420:25582426:-:0.000003 | - |
| SknshCellPapTssHmm    | chr15 | 25582442 | 25582445 | chr15:25582442:25582445:-:0.000031 | - |
| SknshCellPapTssHmm    | chr15 | 25582539 | 25582541 | chr15:25582539:25582541:-:0.000002 | - |
| SknshCellPapTssHmm    | chr15 | 25582739 | 25582747 | chr15:25582739:25582747:-:0.000000 | - |
| SknshCellPapTssHmm    | chr15 | 25582973 | 25582979 | chr15:25582973:25582979:-:0.000000 | - |
| SknshCellPapTssHmm    | chr15 | 25583005 | 25583010 | chr15:25583005:25583010:-:0.000000 | - |
| SknshCellPapTssHmm    | chr15 | 25583231 | 25583235 | chr15:25583231:25583235:-:0.000002 | - |
| SknshCellPapTssHmm    | chr15 | 25583414 | 25583422 | chr15:25583414:25583422:-:0.000000 | - |
| SknshCellPapTssHmm    | chr15 | 25583446 | 25583452 | chr15:25583446:25583452:-:0.000000 | - |
| SknshCellPapTssHmm    | chr15 | 25583492 | 25583499 | chr15:25583492:25583499:-:0.000000 | - |
| SknshCellPapTssHmm    | chr15 | 25583790 | 25583794 | chr15:25583790:25583794:-:0.000001 | - |
| SknshCellPapTssHmm    | chr15 | 25583870 | 25583873 | chr15:25583870:25583873:-:0.000001 | - |
| SknshCellPapTssHmm    | chr15 | 25583885 | 25583888 | chr15:25583885:25583888:-:0.000000 | - |
| SknshCellPapTssHmm    | chr15 | 25583986 | 25583999 | chr15:25583986:25583999:-:0.000001 | - |
| SknshCellPapTssHmm    | chr15 | 25584093 | 25584209 | chr15:25584093:25584209:-:0.000015 | - |
| SknshCellPapTssHmm    | chr15 | 25584247 | 25584254 | chr15:25584247:25584254:-:0.000002 | - |
| SknshCellPapTssHmm    | chr15 | 25584291 | 25584294 | chr15:25584291:25584294:-:0.000003 | - |
| SknshCellPapTssHmm    | chr15 | 25584318 | 25584320 | chr15:25584318:25584320:-:0.000067 | - |
| SknshCellPapTssHmm    | chr15 | 25584332 | 25584334 | chr15:25584332:25584334:-:0.000095 | - |
| SknshCellPapTssHmm    | chr15 | 25584403 | 25584408 | chr15:25584403:25584408:-:0.000000 | - |
| SknshCellPapTssHmm    | chr15 | 25585276 | 25585378 | chr15:25585276:25585378:-:0.000002 | - |
| SknshCytosolPapTssHmm | chr15 | 25414365 | 25414564 | chr15:25414365:25414564:-:0.000016 | - |

|                       |       |          |          |                                    |   |
|-----------------------|-------|----------|----------|------------------------------------|---|
| SknshCytosolPapTssHmm | chr15 | 25507642 | 25507649 | chr15:25507642:25507649:-:0.000001 | - |
| SknshCytosolPapTssHmm | chr15 | 25550015 | 25550018 | chr15:25550015:25550018:-:0.000000 | - |
| SknshCytosolPapTssHmm | chr15 | 25579029 | 25579044 | chr15:25579029:25579044:-:0.000000 | - |
| SknshCytosolPapTssHmm | chr15 | 25579572 | 25579577 | chr15:25579572:25579577:-:0.000000 | - |
| SknshCytosolPapTssHmm | chr15 | 25580264 | 25580345 | chr15:25580264:25580345:-:0.000186 | - |
| SknshCytosolPapTssHmm | chr15 | 25582420 | 25582426 | chr15:25582420:25582426:-:0.000003 | - |
| SknshCytosolPapTssHmm | chr15 | 25582442 | 25582445 | chr15:25582442:25582445:-:0.000031 | - |
| SknshCytosolPapTssHmm | chr15 | 25582539 | 25582541 | chr15:25582539:25582541:-:0.000002 | - |
| SknshCytosolPapTssHmm | chr15 | 25582739 | 25582747 | chr15:25582739:25582747:-:0.000000 | - |
| SknshCytosolPapTssHmm | chr15 | 25582973 | 25582979 | chr15:25582973:25582979:-:0.000000 | - |
| SknshCytosolPapTssHmm | chr15 | 25583231 | 25583235 | chr15:25583231:25583235:-:0.000002 | - |
| SknshCytosolPapTssHmm | chr15 | 25583446 | 25583452 | chr15:25583446:25583452:-:0.000000 | - |
| SknshCytosolPapTssHmm | chr15 | 25583492 | 25583499 | chr15:25583492:25583499:-:0.000000 | - |
| SknshCytosolPapTssHmm | chr15 | 25583790 | 25583794 | chr15:25583790:25583794:-:0.000001 | - |
| SknshCytosolPapTssHmm | chr15 | 25583870 | 25583873 | chr15:25583870:25583873:-:0.000001 | - |
| SknshCytosolPapTssHmm | chr15 | 25583986 | 25583999 | chr15:25583986:25583999:-:0.000001 | - |
| SknshCytosolPapTssHmm | chr15 | 25584093 | 25584209 | chr15:25584093:25584209:-:0.000015 | - |
| SknshCytosolPapTssHmm | chr15 | 25584247 | 25584254 | chr15:25584247:25584254:-:0.000002 | - |
| SknshCytosolPapTssHmm | chr15 | 25584291 | 25584294 | chr15:25584291:25584294:-:0.000003 | - |
| SknshCytosolPapTssHmm | chr15 | 25584318 | 25584320 | chr15:25584318:25584320:-:0.000067 | - |
| SknshCytosolPapTssHmm | chr15 | 25584403 | 25584408 | chr15:25584403:25584408:-:0.000000 | - |
| SknshCytosolPapTssHmm | chr15 | 25585276 | 25585378 | chr15:25585276:25585378:-:0.000002 | - |
| SknshNucleusPapTssHmm | chr15 | 25364300 | 25364320 | chr15:25364300:25364320:-:0.000085 | - |
| SknshNucleusPapTssHmm | chr15 | 25414365 | 25414564 | chr15:25414365:25414564:-:0.000016 | - |
| SknshNucleusPapTssHmm | chr15 | 25507642 | 25507649 | chr15:25507642:25507649:-:0.000001 | - |
| SknshNucleusPapTssHmm | chr15 | 25550015 | 25550018 | chr15:25550015:25550018:-:0.000000 | - |
| SknshNucleusPapTssHmm | chr15 | 25563024 | 25563103 | chr15:25563024:25563103:-:0.000000 | - |
| SknshNucleusPapTssHmm | chr15 | 25578211 | 25578222 | chr15:25578211:25578222:-:0.000001 | - |
| SknshNucleusPapTssHmm | chr15 | 25578407 | 25578414 | chr15:25578407:25578414:-:0.000518 | - |
| SknshNucleusPapTssHmm | chr15 | 25578921 | 25578925 | chr15:25578921:25578925:-:0.000000 | - |

|                       |       |          |          |                                         |   |
|-----------------------|-------|----------|----------|-----------------------------------------|---|
| SknshNucleusPapTssHmm | chr15 | 25579029 | 25579044 | chr15:25579029:25579044:-:0.000000      | - |
| SknshNucleusPapTssHmm | chr15 | 25579514 | 25579521 | chr15:25579514:25579521:-:0.000000      | - |
| SknshNucleusPapTssHmm | chr15 | 25579572 | 25579577 | chr15:25579572:25579577:-:0.000000      | - |
| SknshNucleusPapTssHmm | chr15 | 25579777 | 25579785 | chr15:25579777:25579785:-:0.000000      | - |
| SknshNucleusPapTssHmm | chr15 | 25580264 | 25580345 | chr15:25580264:25580345:-:0.000186      | - |
| SknshNucleusPapTssHmm | chr15 | 25581271 | 25581283 | chr15:25581271:25581283:-:0.000639      | - |
| SknshNucleusPapTssHmm | chr15 | 25582420 | 25582426 | chr15:25582420:25582426:-:0.000003      | - |
| SknshNucleusPapTssHmm | chr15 | 25582442 | 25582445 | chr15:25582442:25582445:-:0.000031      | - |
| SknshNucleusPapTssHmm | chr15 | 25582739 | 25582747 | chr15:25582739:25582747:-:0.000000      | - |
| SknshNucleusPapTssHmm | chr15 | 25583005 | 25583010 | chr15:25583005:25583010:-:0.000000      | - |
| SknshNucleusPapTssHmm | chr15 | 25583414 | 25583422 | chr15:25583414:25583422:-:0.000000      | - |
| SknshNucleusPapTssHmm | chr15 | 25583446 | 25583452 | chr15:25583446:25583452:-:0.000000      | - |
| SknshNucleusPapTssHmm | chr15 | 25583492 | 25583499 | chr15:25583492:25583499:-:0.000000      | - |
| SknshNucleusPapTssHmm | chr15 | 25583790 | 25583794 | chr15:25583790:25583794:-:0.000001      | - |
| SknshNucleusPapTssHmm | chr15 | 25583885 | 25583888 | chr15:25583885:25583888:-:0.000000      | - |
| SknshNucleusPapTssHmm | chr15 | 25583986 | 25583999 | chr15:25583986:25583999:-:0.000001      | - |
| SknshNucleusPapTssHmm | chr15 | 25584093 | 25584209 | chr15:25584093:25584209:-:0.000015      | - |
| SknshNucleusPapTssHmm | chr15 | 25584247 | 25584254 | chr15:25584247:25584254:-:0.000002      | - |
| SknshNucleusPapTssHmm | chr15 | 25584291 | 25584294 | chr15:25584291:25584294:-:0.000003      | - |
| SknshNucleusPapTssHmm | chr15 | 25584318 | 25584320 | chr15:25584318:25584320:-:0.000067      | - |
| SknshNucleusPapTssHmm | chr15 | 25584332 | 25584334 | chr15:25584332:25584334:-:0.000095      | - |
| SknshNucleusPapTssHmm | chr15 | 25584403 | 25584408 | chr15:25584403:25584408:-:0.000000      | - |
| SknshNucleusPapTssHmm | chr15 | 25585276 | 25585378 | chr15:25585276:25585378:-:0.000002      | - |
| SknshNucleusPapTssHmm | chr15 | 25587933 | 25587973 | chr15:25587933:25587973:-:0.002661      | - |
| SknshNucleusPapTssHmm | chr15 | 25588612 | 25588617 | chr15:25588612:25588617:-:0.000000      | - |
| SknshNucleusPapTssHmm | chr15 | 25590127 | 25590178 | chr15:25590127:25590178:-:0.000003      | - |
| SknshraCellPapTssHmm  | chr15 | 25583447 | 25583503 | chr15:25583447:25583503:-:1.41:0.000084 | - |
| SknshraCellPapTssHmm  | chr15 | 25583788 | 25583889 | chr15:25583788:25583889:-:0.16:0.000015 | - |
| SknshraCellPapTssHmm  | chr15 | 25584094 | 25584253 | chr15:25584094:25584253:-:0.67:0.000000 | - |
| SknshraCellPapTssHmm  | chr15 | 25584318 | 25584334 | chr15:25584318:25584334:-:1.06:0.000041 | - |

|                      |       |          |          |                                         |   |
|----------------------|-------|----------|----------|-----------------------------------------|---|
| SknshraCellPapTssHmm | chr15 | 25585024 | 25585026 | chr15:25585024:25585026:-:4.57:0.000000 | - |
| SknshraCellPapTssHmm | chr15 | 25585277 | 25585377 | chr15:25585277:25585377:-:0.64:0.000103 | - |



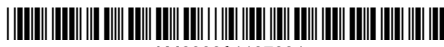

# FirstChoice® Human Total RNA Survey Panel

**Table S4. General information of the total RNA samples used in this study.**

Store at  $-70^{\circ}\text{C}$ .  
*Do not store in a frost-free freezer.*

|                                        |                                                                                                                                                                                                       |
|----------------------------------------|-------------------------------------------------------------------------------------------------------------------------------------------------------------------------------------------------------|
| <b>Catalog #:</b>                      | AM6000                                                                                                                                                                                                |
| <b>Amount:</b>                         | 10 $\mu\text{g}$ each pool                                                                                                                                                                            |
| <b>Source:</b>                         | See page 3+                                                                                                                                                                                           |
| <b>Absorbance</b> <sub>260/280</sub> : | 1.7–2.1                                                                                                                                                                                               |
| <b>Concentration:</b>                  | 1 mg/mL                                                                                                                                                                                               |
| <b>Storage Conditions:</b>             | Store at or below $-70^{\circ}\text{C}$ . Avoid multiple freeze-thaw cycles. Aliquots of the product may be stored short-term at $-20^{\circ}\text{C}$ . <i>Do not store in a frost-free freezer.</i> |
| <b>Storage Buffer:</b>                 | THE RNA Storage Solution (1 mM Sodium Citrate, pH 6.4; Cat #AM7000)                                                                                                                                   |

---

## USER INFORMATION

---

**Product Description:** Ambion's FirstChoice® Human Total RNA Survey Panel consists of 10  $\mu\text{g}$  pools of total RNA from 20 different normal, human tissues. Each pool is comprised of RNA from at least 3 tissue donors and includes documentation on each donor in the form of age, sex, race, cause of death, or diagnoses.

FirstChoice® Human Tissue Total RNA is prepared from tissues that have been frozen or stored in RNA/ater® Tissue Collection: RNA Stabilization Solution (Cat #AM7020) until processing. RNA is isolated using a modified version of Ambion's ToTALLY RNA™ Kit (Cat #AM1910). The purified RNA undergoes a stringent DNase treatment. It has been precisely quantified and is provided at 1 mg/mL in THE RNA Storage Solution (Cat #AM7000). The integrity of the RNA is verified by capillary electrophoresis using the Agilent® 2100 bioanalyzer.

FirstChoice Tissue Total RNA provides the researcher with access to RNA isolated from tissue that might otherwise be unavailable or difficult to work with due to small sample size or high RNase content. In addition, the RNA may serve as a positive control when a particular mRNA is known to be expressed in this tissue. FirstChoice Total RNAs are ready for use in RT-PCR, Northern analysis, ribonuclease protection assays, S1 nuclease assays, cDNA synthesis, and in vitro translation. FirstChoice Tissue Total RNA is certified to contain small RNAs (miRNA, siRNA, and snRNA).

**Handling Instructions:** RNA is very sensitive to degradation by exogenous ribonucleases introduced during handling. Wear gloves when handling this product. Use RNase-free reagents, tubes, and barrier pipette tips.

### Thawing Instructions

Thaw just to completion at  $37^{\circ}\text{C}$ , vortex for a few seconds when fully thawed, and place on ice. Aliquot the RNA, if necessary, to minimize freeze-thaw cycles ( $\leq 5$ ).

**Tissue Procurement:** Ambion is committed to the highest ethical standards for tissue procurement.

- Ambion is committed to maintaining the highest level of ethical standards with regard to all tissue that is used in the preparation of RNA and RNA-derived products.
- Ambion certifies that all of our human-derived materials have been prepared from tissue obtained with consent from a fully informed donor or a member of the donor's family.
- Ambion further guarantees that all human tissue received has been procured following our internal guidelines and policies.

Note: No known test method can offer absolute assurance that products derived from human biological materials will not transmit infectious diseases. Employ appropriate universal precautions when using human-derived materials [1].

**Reference:** 1. Grizzle WE and Polt SS (1998) Guidelines to avoid personnel contamination by infective agents in research laboratories that use human tissues. *J Tissue Culture Methods*. 11:191–199.

---

**CERTIFICATE OF ANALYSIS**

---

**Product:** FirstChoice® Human Total RNA Survey Panel  
**Catalog #:** AM6000  
**Lot #:** 1107091  
**Nonspecific Endonuclease Activity:** Meets or exceeds specification when a sample is incubated with 300 ng supercoiled plasmid DNA and analyzed by agarose gel electrophoresis.  
Result: PASS  
**Exonuclease Activity:** Meets or exceeds specification when a sample is incubated with labeled double-stranded DNA and analyzed by PAGE.  
Result: PASS  
**Functional Testing:**  
**Accelerated Stability Testing**  
RNA integrity is checked on an Agilent® bioanalyzer before and after a 14–18 hr incubation at 37°C.  
Result: PASS  
**DNA Contamination**  
Real-time PCR using a TBP (Tata Box Binding Protein) TaqMan® probe is performed.  
Result: PASS



Michael Zwick  
Manager, Quality Assurance

---

**OTHER INFORMATION**

---

**Material Safety Data Sheets:** Material Safety Data Sheets (MSDSs) can be printed or downloaded from product-specific links on our website at the following address: [www.ambion.com/techlib/msds](http://www.ambion.com/techlib/msds). Alternatively, e-mail your request to [MSDS\\_Inquiry\\_CCRM@appliedbiosystems.com](mailto:MSDS_Inquiry_CCRM@appliedbiosystems.com). Specify the catalog or part number(s) of the product(s), and we will e-mail the associated MSDSs unless you specify a preference for fax delivery. For customers without access to the internet or fax, our technical service department can fulfill MSDS requests placed by telephone or postal mail. (Requests for postal delivery require 1–2 weeks for processing.)

**Warranty and Liability:** *For research use only. Not for use in diagnostic procedures.*  
Applied Biosystems is committed to delivering superior product quality and performance, supported by industry-leading global service and technical support teams. Warranty information for the accompanying consumable product is available at [www.ambion.com/info/warranty](http://www.ambion.com/info/warranty) in "Limited Warranty for Consumables," which is subject to the exclusions, conditions, exceptions, and limitations set forth under the caption "EXCLUSIONS, CONDITIONS, EXCEPTIONS, AND LIMITATIONS" in the full warranty statement. Please contact Applied Biosystems if you have any questions about our warranties or would like information about post-warranty support.

© 2007 Ambion, Inc. All rights reserved. 4384681D

---

**HUMAN TOTAL RNA SURVEY PANEL DONOR INFORMATION**

---

---

**Adipose**

---

|                           |                          |                         |                                               |                                                 |
|---------------------------|--------------------------|-------------------------|-----------------------------------------------|-------------------------------------------------|
| <b>Donor Information:</b> | Race:<br>Gender:<br>Age: | Hispanic<br>Male<br>60  | Negative Serology Results:<br>C.O.D. / Other: | HIV I/II, HBV, HCV<br>Fall - Intracranial Bleed |
| <b>Donor Information:</b> | Race:<br>Gender:<br>Age: | caucasian<br>Male<br>85 | Negative Serology Results:<br>C.O.D. / Other: | HIV I/II, HBV, HCV<br>cardiac arrest            |
| <b>Donor Information:</b> | Race:<br>Gender:<br>Age: | Caucasian<br>Male<br>59 | Negative Serology Results:<br>C.O.D. / Other: | HIV I/II, HCV<br>Motor Vehicle Accident         |

---

**Bladder**

---

|                           |                          |                         |                                               |                                              |
|---------------------------|--------------------------|-------------------------|-----------------------------------------------|----------------------------------------------|
| <b>Donor Information:</b> | Race:<br>Gender:<br>Age: | Caucasian<br>Male<br>86 | Negative Serology Results:<br>C.O.D. / Other: | HIV I/II, HBV, HCV<br>Cardiopulmonary Arrest |
| <b>Donor Information:</b> | Race:<br>Gender:<br>Age: | Caucasian<br>Male<br>79 | Negative Serology Results:<br>C.O.D. / Other: | HIV1/2, HBV, HCV<br>Cardiac arrest           |
| <b>Donor Information:</b> | Race:<br>Gender:<br>Age: | Caucasian<br>Male<br>96 | Negative Serology Results:<br>C.O.D. / Other: | HIV I/II, HBV, HCV<br>Unknown                |

---

**Brain**

---

|                           |                          |                           |                                               |                                                |
|---------------------------|--------------------------|---------------------------|-----------------------------------------------|------------------------------------------------|
| <b>Donor Information:</b> | Race:<br>Gender:<br>Age: | Caucasian<br>Female<br>59 | Negative Serology Results:<br>C.O.D. / Other: | HIV I/II, HBV, HCV<br>Congestive Heart Failure |
| <b>Donor Information:</b> | Race:<br>Gender:<br>Age: | Caucasian<br>Male<br>23   | Negative Serology Results:<br>C.O.D. / Other: | HIV I/II, HBV, HCV<br>Cardiac Arrest           |
| <b>Donor Information:</b> | Race:<br>Gender:<br>Age: | Caucasian<br>Female<br>85 | Negative Serology Results:<br>C.O.D. / Other: | HIV I/II, HCV<br>Pneumonia                     |

---

**Cervix**

---

|                           |                          |                                  |                                               |                                             |
|---------------------------|--------------------------|----------------------------------|-----------------------------------------------|---------------------------------------------|
| <b>Donor Information:</b> | Race:<br>Gender:<br>Age: | Caucasian<br>Female<br>49        | Negative Serology Results:<br>C.O.D. / Other: | HIV1/2, HBV, HCV<br>Intracranial Hemorrhage |
| <b>Donor Information:</b> | Race:<br>Gender:<br>Age: | Caucasian<br>Female<br>42        | Negative Serology Results:<br>C.O.D. / Other: | HIV, HBV<br>N/A - hysterectomy              |
| <b>Donor Information:</b> | Race:<br>Gender:<br>Age: | African-American<br>Female<br>49 | Negative Serology Results:<br>C.O.D. / Other: | HIV I/II, HBV, HCV<br>N/A - hysterectomy    |

---

**Colon**

---

|                           |                          |                         |                                               |                                                |
|---------------------------|--------------------------|-------------------------|-----------------------------------------------|------------------------------------------------|
| <b>Donor Information:</b> | Race:<br>Gender:<br>Age: | Caucasian<br>Male<br>62 | Negative Serology Results:<br>C.O.D. / Other: | HIV I, HIV II, HBV, HCV<br>Head Trauma         |
| <b>Donor Information:</b> | Race:<br>Gender:<br>Age: | n/a<br>Female<br>75     | Negative Serology Results:<br>C.O.D. / Other: | HIV I/II, HBV, HCV<br>Congestive Heart Failure |

---

|                           |                          |                         |                                               |                                   |
|---------------------------|--------------------------|-------------------------|-----------------------------------------------|-----------------------------------|
| <b>Donor Information:</b> | Race:<br>Gender:<br>Age: | Caucasian<br>Male<br>71 | Negative Serology Results:<br>C.O.D. / Other: | HIV I, II, HBV, HCV<br>Alzheimers |
|---------------------------|--------------------------|-------------------------|-----------------------------------------------|-----------------------------------|

---

### Esophagus

---

|                           |                          |                           |                                               |                                                             |
|---------------------------|--------------------------|---------------------------|-----------------------------------------------|-------------------------------------------------------------|
| <b>Donor Information:</b> | Race:<br>Gender:<br>Age: | Caucasian<br>Female<br>85 | Negative Serology Results:<br>C.O.D. / Other: | HIV I/II, HBV, HCV<br>Chronic obstructive pulmonary disease |
|---------------------------|--------------------------|---------------------------|-----------------------------------------------|-------------------------------------------------------------|

|                           |                          |                           |                                               |                                      |
|---------------------------|--------------------------|---------------------------|-----------------------------------------------|--------------------------------------|
| <b>Donor Information:</b> | Race:<br>Gender:<br>Age: | Caucasian<br>Female<br>75 | Negative Serology Results:<br>C.O.D. / Other: | HIV I/II, HBV, HCV<br>Cardiac arrest |
|---------------------------|--------------------------|---------------------------|-----------------------------------------------|--------------------------------------|

|                           |                          |                         |                                               |                                      |
|---------------------------|--------------------------|-------------------------|-----------------------------------------------|--------------------------------------|
| <b>Donor Information:</b> | Race:<br>Gender:<br>Age: | Caucasian<br>Male<br>74 | Negative Serology Results:<br>C.O.D. / Other: | HIV I/II, HBV, HCV<br>Cardiac arrest |
|---------------------------|--------------------------|-------------------------|-----------------------------------------------|--------------------------------------|

---

### Heart

---

|                           |                          |                           |                                               |                                             |
|---------------------------|--------------------------|---------------------------|-----------------------------------------------|---------------------------------------------|
| <b>Donor Information:</b> | Race:<br>Gender:<br>Age: | Caucasian<br>Female<br>73 | Negative Serology Results:<br>C.O.D. / Other: | HIV I/II, HBV, HCV, RPR<br>Heart related-MI |
|---------------------------|--------------------------|---------------------------|-----------------------------------------------|---------------------------------------------|

|                           |                          |                           |                                               |                                       |
|---------------------------|--------------------------|---------------------------|-----------------------------------------------|---------------------------------------|
| <b>Donor Information:</b> | Race:<br>Gender:<br>Age: | Caucasian<br>Female<br>70 | Negative Serology Results:<br>C.O.D. / Other: | HIV I, HIV II, HBV, HCV<br>Alzheimers |
|---------------------------|--------------------------|---------------------------|-----------------------------------------------|---------------------------------------|

|                           |                          |                         |                                               |                              |
|---------------------------|--------------------------|-------------------------|-----------------------------------------------|------------------------------|
| <b>Donor Information:</b> | Race:<br>Gender:<br>Age: | Caucasian<br>Male<br>74 | Negative Serology Results:<br>C.O.D. / Other: | HIV I/II, HBV, HCV<br>Stroke |
|---------------------------|--------------------------|-------------------------|-----------------------------------------------|------------------------------|

---

### Kidney

---

|                           |                          |                                  |                                               |                                               |
|---------------------------|--------------------------|----------------------------------|-----------------------------------------------|-----------------------------------------------|
| <b>Donor Information:</b> | Race:<br>Gender:<br>Age: | African American<br>Female<br>63 | Negative Serology Results:<br>C.O.D. / Other: | HIV I, HIV II, HBV, HCV<br>Intracranial Bleed |
|---------------------------|--------------------------|----------------------------------|-----------------------------------------------|-----------------------------------------------|

|                           |                          |                         |                                               |                                               |
|---------------------------|--------------------------|-------------------------|-----------------------------------------------|-----------------------------------------------|
| <b>Donor Information:</b> | Race:<br>Gender:<br>Age: | Caucasian<br>Male<br>64 | Negative Serology Results:<br>C.O.D. / Other: | HIV I, HIV II, HBV, HCV<br>Intracranial bleed |
|---------------------------|--------------------------|-------------------------|-----------------------------------------------|-----------------------------------------------|

|                           |                          |                          |                                               |                                          |
|---------------------------|--------------------------|--------------------------|-----------------------------------------------|------------------------------------------|
| <b>Donor Information:</b> | Race:<br>Gender:<br>Age: | Hispanic<br>Female<br>62 | Negative Serology Results:<br>C.O.D. / Other: | HIV I/II, HBV, HCV<br>Intracranial bleed |
|---------------------------|--------------------------|--------------------------|-----------------------------------------------|------------------------------------------|

---

### Liver

---

|                           |                          |                       |                                               |                                                |
|---------------------------|--------------------------|-----------------------|-----------------------------------------------|------------------------------------------------|
| <b>Donor Information:</b> | Race:<br>Gender:<br>Age: | Unknown<br>Male<br>69 | Negative Serology Results:<br>C.O.D. / Other: | HIV I, II, HBV, HCV<br>Intracranial Hemorrhage |
|---------------------------|--------------------------|-----------------------|-----------------------------------------------|------------------------------------------------|

|                           |                          |                         |                                               |                                                   |
|---------------------------|--------------------------|-------------------------|-----------------------------------------------|---------------------------------------------------|
| <b>Donor Information:</b> | Race:<br>Gender:<br>Age: | Caucasian<br>Male<br>64 | Negative Serology Results:<br>C.O.D. / Other: | HIV 1, HIV 2, HBV, HCV<br>Intracranial Hemorrhage |
|---------------------------|--------------------------|-------------------------|-----------------------------------------------|---------------------------------------------------|

|                           |                          |                         |                                               |                                         |
|---------------------------|--------------------------|-------------------------|-----------------------------------------------|-----------------------------------------|
| <b>Donor Information:</b> | Race:<br>Gender:<br>Age: | Unknown<br>Female<br>25 | Negative Serology Results:<br>C.O.D. / Other: | HIV, HBV, HCV<br>Motor Vehicle Accident |
|---------------------------|--------------------------|-------------------------|-----------------------------------------------|-----------------------------------------|

---

### Lung

---

|                           |                          |                           |                                               |                                      |
|---------------------------|--------------------------|---------------------------|-----------------------------------------------|--------------------------------------|
| <b>Donor Information:</b> | Race:<br>Gender:<br>Age: | Caucasian<br>Female<br>94 | Negative Serology Results:<br>C.O.D. / Other: | HIV I/II, HBV, HCV<br>Cardiac Arrest |
|---------------------------|--------------------------|---------------------------|-----------------------------------------------|--------------------------------------|

|                           |                  |                   |                                               |                                   |
|---------------------------|------------------|-------------------|-----------------------------------------------|-----------------------------------|
| <b>Donor Information:</b> | Race:<br>Gender: | Caucasian<br>Male | Negative Serology Results:<br>C.O.D. / Other: | HIV I/II, HBV, HCV<br>Head Trauma |
|---------------------------|------------------|-------------------|-----------------------------------------------|-----------------------------------|

Age: 47  
**Donor Information:** Race: Caucasian  
Gender: Male  
Age: 77  
Negative Serology Results: HIV I/II, HBV, HCV  
C.O.D. / Other: Renal Failure

---

#### Ovary

---

**Donor Information:** Race: African American  
Gender: Female  
Age: 47  
Negative Serology Results: HIV I/II, HBV, HCV  
C.O.D. / Other: Intracranial hemorrhage

**Donor Information:** Race: Caucasian  
Gender: Female  
Age: 86  
Negative Serology Results: HIV I/II, HBV, HCV  
C.O.D. / Other: Congestive Heart Failure

**Donor Information:** Race: Caucasian  
Gender: Female  
Age: 92  
Negative Serology Results: HIV I/II, HCV  
C.O.D. / Other: Congestive Heart Failure

---

#### Placenta

---

**Donor Information:** Race: African American  
Gender: Female  
Age: 21  
Negative Serology Results: N/A  
C.O.D. / Other: Collected at birth

**Donor Information:** Race: Caucasian  
Gender: Female  
Age: N/A  
Negative Serology Results: N/A  
C.O.D. / Other: Child birth

**Donor Information:** Race: Caucasian  
Gender: Female  
Age: 33  
Negative Serology Results: N/A  
C.O.D. / Other: Child birth

---

#### Prostate

---

**Donor Information:** Race: Caucasian  
Gender: Male  
Age: 72  
Negative Serology Results: HIV I/II, HCV, HBV  
C.O.D. / Other: Unknown

**Donor Information:** Race: Caucasian  
Gender: Male  
Age: 57  
Negative Serology Results: HIV I/II, HBV, HCV  
C.O.D. / Other: Cerebral Vascular Accident

**Donor Information:** Race: Caucasian  
Gender: Male  
Age: 79  
Negative Serology Results: HIV I/II, HBV, HCV  
C.O.D. / Other: Alzheimer's disease

---

#### Skeletal Muscle

---

**Donor Information:** Race: Caucasian  
Gender: Male  
Age: 60  
Negative Serology Results: HIV I/II, HBV, HCV  
C.O.D. / Other: Cerebral vascular accident

**Donor Information:** Race: Caucasian  
Gender: Female  
Age: 55  
Negative Serology Results: HIV I, II, HBV, HCV  
C.O.D. / Other: Uterine Cancer

**Donor Information:** Race: Caucasian  
Gender: Female  
Age: 49  
Negative Serology Results: HIV I/II, HBV, HCV  
C.O.D. / Other: Intracranial hemorrhage

---

#### Small Intestine

---

**Donor Information:** Race: Caucasian  
Gender: Female  
Age: 40  
Negative Serology Results: HIV I/II, HBV, HCV  
C.O.D. / Other: Hemorrhagic stroke

---

|                           |                          |                         |                                               |                                               |
|---------------------------|--------------------------|-------------------------|-----------------------------------------------|-----------------------------------------------|
| <b>Donor Information:</b> | Race:<br>Gender:<br>Age: | Caucasian<br>Male<br>15 | Negative Serology Results:<br>C.O.D. / Other: | HIV I/II, HBV, HCV<br>Anoxia                  |
| <b>Donor Information:</b> | Race:<br>Gender:<br>Age: | Caucasian<br>Male<br>85 | Negative Serology Results:<br>C.O.D. / Other: | HIV I/II, HBV, HCV<br>Intracranial hemorrhage |

---

### Spleen

---

|                           |                          |                                |                                               |                                                  |
|---------------------------|--------------------------|--------------------------------|-----------------------------------------------|--------------------------------------------------|
| <b>Donor Information:</b> | Race:<br>Gender:<br>Age: | Caucasian<br>Male<br>70        | Negative Serology Results:<br>C.O.D. / Other: | HIV I/II, HBV, HCV<br>Anoxia                     |
| <b>Donor Information:</b> | Race:<br>Gender:<br>Age: | Caucasian<br>Male<br>50        | Negative Serology Results:<br>C.O.D. / Other: | HIV I/II, HBV, HCV<br>Cerebral vascular accident |
| <b>Donor Information:</b> | Race:<br>Gender:<br>Age: | African American<br>Male<br>39 | Negative Serology Results:<br>C.O.D. / Other: | HIV I/II, HBV, HCV<br>Motor vehicle accident     |

---

### Testes

---

|                           |                          |                         |                                               |                                         |
|---------------------------|--------------------------|-------------------------|-----------------------------------------------|-----------------------------------------|
| <b>Donor Information:</b> | Race:<br>Gender:<br>Age: | Caucasian<br>Male<br>36 | Negative Serology Results:<br>C.O.D. / Other: | HIV I/II, HCV<br>Deep Veined Thrombosis |
| <b>Donor Information:</b> | Race:<br>Gender:<br>Age: | Caucasian<br>Male<br>57 | Negative Serology Results:<br>C.O.D. / Other: | HIV I/II, HCV<br>Intracranial Bleeding  |
| <b>Donor Information:</b> | Race:<br>Gender:<br>Age: | Caucasian<br>Male<br>34 | Negative Serology Results:<br>C.O.D. / Other: | HIV I/II, HCV<br>Head Trauma            |

---

### Thymus

---

|                           |                          |                              |                                               |                                                 |
|---------------------------|--------------------------|------------------------------|-----------------------------------------------|-------------------------------------------------|
| <b>Donor Information:</b> | Race:<br>Gender:<br>Age: | Unknown<br>Male<br>10 months | Negative Serology Results:<br>C.O.D. / Other: | HIV I/II, HCV<br>N/A - surgical procurement     |
| <b>Donor Information:</b> | Race:<br>Gender:<br>Age: | Unknown<br>Male<br>6 months  | Negative Serology Results:<br>C.O.D. / Other: | HIV I, II, HBV, HCV<br>Surgery                  |
| <b>Donor Information:</b> | Race:<br>Gender:<br>Age: | Unknown<br>Male<br>6 months  | Negative Serology Results:<br>C.O.D. / Other: | HIV I/II, HBV, HCV<br>N/A--surgical procurement |

---

### Thyroid

---

|                           |                          |                           |                                               |                                                  |
|---------------------------|--------------------------|---------------------------|-----------------------------------------------|--------------------------------------------------|
| <b>Donor Information:</b> | Race:<br>Gender:<br>Age: | Caucasian<br>Female<br>38 | Negative Serology Results:<br>C.O.D. / Other: | HIV I/II, HBV, HCV<br>ICH                        |
| <b>Donor Information:</b> | Race:<br>Gender:<br>Age: | Caucasian<br>Female<br>60 | Negative Serology Results:<br>C.O.D. / Other: | HIV I/II, HBV, HCV<br>Cerebral vascular accident |
| <b>Donor Information:</b> | Race:<br>Gender:<br>Age: | Caucasian<br>Female<br>68 | Negative Serology Results:<br>C.O.D. / Other: | HIV I/II, HBV, HCV<br>Gall bladder cancer        |

---

### Trachea

---

|                           |                          |                           |                                               |                                                |
|---------------------------|--------------------------|---------------------------|-----------------------------------------------|------------------------------------------------|
| <b>Donor Information:</b> | Race:<br>Gender:<br>Age: | Caucasian<br>Female<br>78 | Negative Serology Results:<br>C.O.D. / Other: | HIV I/II, HBV, HCV<br>Congestive heart failure |
|---------------------------|--------------------------|---------------------------|-----------------------------------------------|------------------------------------------------|

**Donor Information:**

Race: Caucasian  
Gender: Male  
Age: 59

Negative Serology Results: HIV I/II, HBV, HCV  
C.O.D. / Other: Aspiration

**Donor Information:**

Race: Caucasian  
Gender: Male  
Age: 59

Negative Serology Results: HIV I/II, HBV, HCV  
C.O.D. / Other: Lung cancer

**Table S5.** qPCR data analyses for Figures 2 and 3

| <b>SNORD64</b> | <b>Ruler<br/>Mean Cq</b> | <b>Ruler<br/>StDev Cq</b> | <b>SNORD64<br/>Mean Cq</b> | <b>SNORD64<br/>StDev Cq</b> | <b>SNORD64<br/><math>\Delta</math>Cq</b> | <b>SNORD64<br/><math>2^{\Delta</math>Cq}</b> |
|----------------|--------------------------|---------------------------|----------------------------|-----------------------------|------------------------------------------|----------------------------------------------|
| Adipose        | 20.25                    | 0.10                      | 23.054582                  | 0.307123996                 | -2.80                                    | 0.143608495                                  |
| Bladder        | 19.91                    | 0.09                      | 22.70260767                | 0.063757062                 | -2.79                                    | 0.144651544                                  |
| Brain          | 19.48                    | 0.05                      | 18.98988133                | 0.243782265                 | 0.49                                     | 1.407569353                                  |
| Cervex         | 20.30                    | 0.04                      | 22.58648933                | 0.054829017                 | -2.29                                    | 0.204873666                                  |
| Colon          | 20.07                    | 0.08                      | 23.18119533                | 0.059277453                 | -3.11                                    | 0.115479025                                  |
| Esophagus      | 20.34                    | 0.13                      | 23.84348533                | 0.092714396                 | -3.50                                    | 0.088456943                                  |
| Heart          | 20.50                    | 0.12                      | 21.51018133                | 0.126672967                 | -1.01                                    | 0.497757523                                  |
| Kidney         | 20.37                    | 0.07                      | 22.06369733                | 0.163073479                 | -1.69                                    | 0.309932629                                  |
| Liver          | 19.97                    | 0.05                      | 24.65144167                | 0.130773978                 | -4.68                                    | 0.039067988                                  |
| Lung           | 19.99                    | 0.07                      | 23.289068                  | 0.092509188                 | -3.29                                    | 0.101942364                                  |
| Ovary          | 19.70                    | 0.10                      | 20.232985                  | 0.04736916                  | -0.53                                    | 0.692157556                                  |
| Placenta       | 19.40                    | 0.07                      | 25.15985833                | 0.081082302                 | -5.76                                    | 0.018479387                                  |
| Prostate       | 20.10                    | 0.09                      | 22.363168                  | 0.112861529                 | -2.26                                    | 0.208135939                                  |
| Skeletal Mus   | 19.98                    | 0.11                      | 21.547954                  | 0.144862142                 | -1.56                                    | 0.338217058                                  |
| Small Intesti  | 19.92                    | 0.09                      | 23.21274467                | 0.057879459                 | -3.30                                    | 0.101832266                                  |
| Spleen         | 19.44                    | 0.11                      | 22.81798033                | 0.030152828                 | -3.38                                    | 0.096371305                                  |
| Testis         | 19.86                    | 0.18                      | 22.68354                   | 0.157210759                 | -2.83                                    | 0.140978166                                  |
| Thymus         | 19.18                    | 0.11                      | 21.49162733                | 0.158055178                 | -2.32                                    | 0.200768926                                  |
| Thyroid        | 19.00                    | 0.22                      | 19.78155333                | 0.182734991                 | -0.78                                    | 0.582574762                                  |
| Trachea        | 19.98                    | 0.14                      | 23.13872533                | 0.233538126                 | -3.16                                    | 0.1116218                                    |

| <b>SNORD116</b> | <b>Ruler<br/>Mean Cq</b> | <b>Ruler<br/>StDev Cq</b> | <b>SNORD116<br/>Mean Cq</b> | <b>SNORD116<br/>StDev Cq</b> | <b>SNORD116<br/><math>\Delta</math>Cq</b> | <b>SNORD116<br/><math>2^{\Delta</math>Cq}</b> |
|-----------------|--------------------------|---------------------------|-----------------------------|------------------------------|-------------------------------------------|-----------------------------------------------|
| Adipose         | 20.25                    | 0.10                      | 20.089271                   | 0.907864361                  | 0.17                                      | 1.121573368                                   |
| Bladder         | 19.91                    | 0.09                      | 19.064489                   | 0.199467612                  | 0.85                                      | 1.80096768                                    |
| Brain           | 19.48                    | 0.05                      | 16.41409833                 | 0.173811322                  | 3.07                                      | 8.391850681                                   |
| Cervex          | 20.30                    | 0.04                      | 19.14205867                 | 0.051089206                  | 1.16                                      | 2.230298989                                   |
| Colon           | 20.07                    | 0.08                      | 19.66393967                 | 0.226317956                  | 0.40                                      | 1.322216483                                   |
| Esophagus       | 20.34                    | 0.13                      | 19.90734933                 | 0.360554848                  | 0.44                                      | 1.35402577                                    |
| Heart           | 20.50                    | 0.12                      | 18.731496                   | 0.292876903                  | 1.77                                      | 3.415745198                                   |
| Kidney          | 20.37                    | 0.07                      | 19.047473                   | 0.309686876                  | 1.33                                      | 2.507502062                                   |
| Liver           | 19.97                    | 0.05                      | 20.80258                    | 0.089744279                  | -0.83                                     | 0.562916345                                   |
| Lung            | 19.99                    | 0.07                      | 18.83555367                 | 0.138571223                  | 1.16                                      | 2.23355218                                    |
| Ovary           | 19.70                    | 0.10                      | 17.54498067                 | 0.033648299                  | 2.16                                      | 4.460411192                                   |
| Placenta        | 19.40                    | 0.07                      | 20.92168067                 | 0.095850664                  | -1.52                                     | 0.348743537                                   |
| Prostate        | 20.10                    | 0.09                      | 18.19235933                 | 0.061413966                  | 1.91                                      | 3.748742336                                   |
| Skeletal Mus    | 19.98                    | 0.11                      | 18.93389767                 | 0.059095604                  | 1.05                                      | 2.07064131                                    |
| Small Intesti   | 19.92                    | 0.09                      | 20.47052233                 | 0.400152573                  | -0.55                                     | 0.681359922                                   |
| Spleen          | 19.44                    | 0.11                      | 19.623311                   | 0.055023849                  | -0.18                                     | 0.882346228                                   |
| Testis          | 19.86                    | 0.18                      | 18.365521                   | 0.156346579                  | 1.49                                      | 2.811933843                                   |
| Thymus          | 19.18                    | 0.11                      | 18.008961                   | 0.019771798                  | 1.17                                      | 2.244313523                                   |
| Thyroid         | 19.00                    | 0.22                      | 15.89837                    | 0.081526735                  | 3.10                                      | 8.596196375                                   |



|         |       |      |           |             |      |            |
|---------|-------|------|-----------|-------------|------|------------|
| Trachea | 19.98 | 0.14 | 19.802136 | 0.168125957 | 0.17 | 1.12761928 |
|---------|-------|------|-----------|-------------|------|------------|

| <b>SNORD115</b> | <b>Ruler</b>   | <b>Ruler</b>    | <b>SNORD115</b> | <b>SNORD115</b> | <b>SNORD115</b> | <b>SNORD115</b>        |
|-----------------|----------------|-----------------|-----------------|-----------------|-----------------|------------------------|
|                 | <b>Mean Cq</b> | <b>StDev Cq</b> | <b>Mean Cq</b>  | <b>StDev Cq</b> | <b>ΔCq</b>      | <b>2<sup>ΔCq</sup></b> |
| Adipose         | 20.25          | 0.10            | 27.599195       | 0.2171232       | -7.34           | 0.006153401            |
| Bladder         | 19.91          | 0.09            | 25.712524       | 0.0785456       | -5.80           | 0.017957591            |
| Brain           | 19.48          | 0.05            | 17.354382       | 0.1015871       | 2.13            | 4.373249548            |
| Cervex          | 20.30          | 0.04            | 28.421859       | 0.1111631       | -8.12           | 0.003588103            |
| Colon           | 20.07          | 0.08            | 26.43362        | 0.0452215       | -6.37           | 0.012117851            |
| Esophagus       | 20.34          | 0.13            | 26.739799       | 0.1948678       | -6.40           | 0.011881045            |
| Heart           | 20.50          | 0.12            | 25.613941       | 0.0743113       | -5.11           | 0.028950974            |
| Kidney          | 20.37          | 0.07            | 24.279352       | 0.1370962       | -3.91           | 0.066725031            |
| Liver           | 19.97          | 0.05            | 24.523884       | 0.0974269       | -4.55           | 0.04267953             |
| Lung            | 19.99          | 0.07            | 27.273714       | 0.126964        | -7.28           | 0.006439569            |
| Ovary           | 19.70          | 0.10            | 25.296464       | 0.0775472       | -5.59           | 0.02069884             |
| Placenta        | 19.40          | 0.07            | 27.586252       | 0.2816256       | -8.18           | 0.003437718            |
| Prostate        | 20.10          | 0.09            | 24.952844       | 0.0999745       | -4.85           | 0.034576173            |
| Skeletal Mus    | 19.98          | 0.11            | 23.811312       | 0.2427325       | -3.83           | 0.070446068            |
| Small Intesti   | 19.92          | 0.09            | 26.914929       | 0.1827407       | -7.00           | 0.007823786            |
| Spleen          | 19.44          | 0.11            | 29.008224       | 0.4447212       | -9.57           | 0.001319772            |
| Testis          | 19.86          | 0.18            | 25.654508       | 0.1767391       | -5.80           | 0.01798048             |
| Thymus          | 19.18          | 0.11            | 25.122706       | 0.3948621       | -5.95           | 0.016204402            |
| Thyroid         | 19.00          | 0.22            | 22.450982       | 0.1779614       | -3.45           | 0.09157427             |
| Trachea         | 19.98          | 0.14            | 27.897315       | 0.0490945       | -7.92           | 0.004123546            |

| <b>SNORD107</b> | <b>Ruler</b>   | <b>Ruler</b>    | <b>SNORD107</b> | <b>SNORD107</b> | <b>SNORD107</b> | <b>SNORD107</b>        |
|-----------------|----------------|-----------------|-----------------|-----------------|-----------------|------------------------|
|                 | <b>Mean Cq</b> | <b>StDev Cq</b> | <b>Mean Cq</b>  | <b>StDev Cq</b> | <b>ΔCq</b>      | <b>2<sup>ΔCq</sup></b> |
| Adipose         | 20.25          | 0.10            | 22.39596667     | 0.188726731     | -2.14           | 0.226695606            |
| Bladder         | 19.91          | 0.09            | 21.807165       | 0.129540227     | -1.89           | 0.26907799             |
| Brain           | 19.48          | 0.05            | 18.11424        | 0.125057996     | 1.37            | 2.582641404            |
| Cervex          | 20.30          | 0.04            | 21.67076433     | 0.08212645      | -1.37           | 0.386497627            |
| Colon           | 20.07          | 0.08            | 22.43426167     | 0.120651263     | -2.37           | 0.193799453            |
| Esophagus       | 20.34          | 0.13            | 23.19503967     | 0.084670884     | -2.85           | 0.138654358            |
| Heart           | 20.50          | 0.12            | 21.068572       | 0.108165291     | -0.56           | 0.676013686            |
| Kidney          | 20.37          | 0.07            | 21.505664       | 0.121706219     | -1.13           | 0.456301685            |
| Liver           | 19.97          | 0.05            | 23.78540433     | 0.102934928     | -3.81           | 0.071207258            |
| Lung            | 19.99          | 0.07            | 22.19984567     | 0.075612216     | -2.20           | 0.216891882            |
| Ovary           | 19.70          | 0.10            | 19.710469       | 0.12640152      | -0.01           | 0.994255388            |
| Placenta        | 19.40          | 0.07            | 23.52244        | 0.068773877     | -4.12           | 0.057490965            |
| Prostate        | 20.10          | 0.09            | 21.335502       | 0.071578315     | -1.24           | 0.424331593            |
| Skeletal Mus    | 19.98          | 0.11            | 20.88880933     | 0.167863643     | -0.90           | 0.534094153            |
| Small Intesti   | 19.92          | 0.09            | 22.70993067     | 0.180211815     | -2.79           | 0.144293744            |
| Spleen          | 19.44          | 0.11            | 21.70956267     | 0.066077467     | -2.27           | 0.207785244            |
| Testis          | 19.86          | 0.18            | 21.27503567     | 0.327725212     | -1.42           | 0.374243194            |
| Thymus          | 19.18          | 0.11            | 20.549134       | 0.11651013      | -1.37           | 0.385847117            |

|         |       |      |             |             |       |             |
|---------|-------|------|-------------|-------------|-------|-------------|
| Thyroid | 19.00 | 0.22 | 19.07578767 | 0.419046509 | -0.07 | 0.950185288 |
| Trachea | 19.98 | 0.14 | 22.34149367 | 0.345549103 | -2.37 | 0.193972278 |

| SNORD108      | Ruler<br>Mean Cq | Ruler<br>StDev Cq | SNORD108<br>Mean Cq | SNORD108<br>StDev Cq | SNORD108<br>$\Delta Cq$ | SNORD108<br>$2^{\Delta Cq}$ |
|---------------|------------------|-------------------|---------------------|----------------------|-------------------------|-----------------------------|
| Adipose       | 20.25            | 0.10              | 24.29762633         | 0.048908143          | -4.04                   | 0.060671747                 |
| Bladder       | 19.91            | 0.09              | 23.869776           | 0.085571621          | -3.96                   | 0.064412535                 |
| Brain         | 19.48            | 0.05              | 19.72995            | 0.074904517          | -0.25                   | 0.842727051                 |
| Cervex        | 20.30            | 0.04              | 23.49896233         | 0.057724767          | -3.20                   | 0.108843975                 |
| Colon         | 20.07            | 0.08              | 24.241175           | 0.090989579          | -4.17                   | 0.055388223                 |
| Esophagus     | 20.34            | 0.13              | 25.446088           | 0.09510874           | -5.10                   | 0.029127315                 |
| Heart         | 20.50            | 0.12              | 22.54840933         | 0.208151009          | -2.04                   | 0.242370669                 |
| Kidney        | 20.37            | 0.07              | 23.25384767         | 0.142003125          | -2.88                   | 0.135830203                 |
| Liver         | 19.97            | 0.05              | 26.466148           | 0.034826225          | -6.49                   | 0.011105548                 |
| Lung          | 19.99            | 0.07              | 24.68101433         | 0.089569575          | -4.69                   | 0.038845177                 |
| Ovary         | 19.70            | 0.10              | 21.42378833         | 0.061308938          | -1.72                   | 0.303205756                 |
| Placenta      | 19.40            | 0.07              | 27.486042           | 0.007301585          | -8.08                   | 0.003684992                 |
| Prostate      | 20.10            | 0.09              | 23.489472           | 0.092010604          | -3.39                   | 0.095344531                 |
| Skeletal Mus  | 19.98            | 0.11              | 23.03994033         | 0.131576534          | -3.06                   | 0.120243849                 |
| Small Intesti | 19.92            | 0.09              | 24.60575533         | 0.052644955          | -4.69                   | 0.038774608                 |
| Spleen        | 19.44            | 0.11              | 24.39160367         | 0.162357417          | -4.95                   | 0.032377247                 |
| Testis        | 19.86            | 0.18              | 24.55030167         | 0.347787979          | -4.69                   | 0.038654548                 |
| Thymus        | 19.18            | 0.11              | 23.453066           | 0.094615587          | -4.28                   | 0.051551894                 |
| Thyroid       | 19.00            | 0.22              | 21.21131633         | 0.171802514          | -2.21                   | 0.216247013                 |
| Trachea       | 19.98            | 0.14              | 24.38578567         | 0.093832607          | -4.41                   | 0.047026911                 |

| SNORD109A/B   | Ruler<br>Mean Cq | Ruler<br>StDev Cq | SNORD109A/B<br>Mean Cq | SNORD109A/B<br>StDev Cq | SNORD109A/B<br>$\Delta Cq$ | SNORD109A/B<br>$2^{\Delta Cq}$ |
|---------------|------------------|-------------------|------------------------|-------------------------|----------------------------|--------------------------------|
| Adipose       | 20.25            | 0.10              | 25.26813567            | 0.365546767             | -5.01                      | 0.030962362                    |
| Bladder       | 19.91            | 0.09              | 25.491142              | 0.285781508             | -5.58                      | 0.02093585                     |
| Brain         | 19.48            | 0.05              | 20.91862733            | 0.174238781             | -1.44                      | 0.369708472                    |
| Cervex        | 20.30            | 0.04              | 24.725541              | 0.146382178             | -4.43                      | 0.046512258                    |
| Colon         | 20.07            | 0.08              | 25.56718333            | 0.293460564             | -5.50                      | 0.022092718                    |
| Esophagus     | 20.34            | 0.13              | 26.473137              | 0.313427194             | -6.13                      | 0.014293148                    |
| Heart         | 20.50            | 0.12              | 24.260638              | 0.153640211             | -3.76                      | 0.073968681                    |
| Kidney        | 20.37            | 0.07              | 23.55286367            | 0.138053076             | -3.18                      | 0.110403684                    |
| Liver         | 19.97            | 0.05              | 27.11684567            | 0.008481241             | -7.14                      | 0.007073926                    |
| Lung          | 19.99            | 0.07              | 25.90293567            | 0.085069885             | -5.91                      | 0.01665337                     |
| Ovary         | 19.70            | 0.10              | 22.827558              | 0.139242495             | -3.13                      | 0.11459368                     |
| Placenta      | 19.40            | 0.07              | 27.573669              | 0.202296064             | -8.17                      | 0.003467833                    |
| Prostate      | 20.10            | 0.09              | 24.14871933            | 0.07020856              | -4.05                      | 0.060372973                    |
| Skeletal Mus  | 19.98            | 0.11              | 24.080273              | 0.38451372              | -4.10                      | 0.058464404                    |
| Small Intesti | 19.92            | 0.09              | 25.80585067            | 0.379279837             | -5.89                      | 0.016876513                    |
| Spleen        | 19.44            | 0.11              | 25.50166533            | 0.243386756             | -6.06                      | 0.014999544                    |
| Testis        | 19.86            | 0.18              | 23.91136233            | 0.063101222             | -4.05                      | 0.06019224                     |

|         |       |      |             |             |       |             |
|---------|-------|------|-------------|-------------|-------|-------------|
| Thymus  | 19.18 | 0.11 | 24.361135   | 0.122357234 | -5.19 | 0.027471895 |
| Thyroid | 19.00 | 0.22 | 21.808688   | 0.40953048  | -2.81 | 0.142929978 |
| Trachea | 19.98 | 0.14 | 25.40289633 | 0.190297975 | -5.43 | 0.023236228 |

| SCARNA5       | Ruler<br>Mean Cq | Ruler<br>StDev Cq | SCARNA5<br>Mean Cq | SCARNA5<br>StDev Cq | SCARNA5<br>$\Delta Cq$ | SCARNA5<br>$2^{\Delta Cq}$ |
|---------------|------------------|-------------------|--------------------|---------------------|------------------------|----------------------------|
| Adipose       | 20.25            | 0.10              | 22.846253          | 0.095062712         | -2.59                  | 0.165917964                |
| Bladder       | 19.91            | 0.09              | 22.048065          | 0.146083856         | -2.13                  | 0.227698437                |
| Brain         | 19.48            | 0.05              | 21.88383567        | 0.081648955         | -2.40                  | 0.189366321                |
| Cervex        | 20.30            | 0.04              | 22.728872          | 0.007384987         | -2.43                  | 0.185619965                |
| Colon         | 20.07            | 0.08              | 22.68901333        | 0.142634158         | -2.62                  | 0.162429405                |
| Esophagus     | 20.34            | 0.13              | 22.93072067        | 0.15693564          | -2.59                  | 0.166533447                |
| Heart         | 20.50            | 0.12              | 23.754596          | 0.184298906         | -3.25                  | 0.105046526                |
| Kidney        | 20.37            | 0.07              | 22.91395433        | 0.120164023         | -2.54                  | 0.171915264                |
| Liver         | 19.97            | 0.05              | 21.77231767        | 0.040797471         | -1.80                  | 0.287424466                |
| Lung          | 19.99            | 0.07              | 22.243755          | 0.068476861         | -2.25                  | 0.210390086                |
| Ovary         | 19.70            | 0.10              | 21.99824933        | 0.094522382         | -2.30                  | 0.203613913                |
| Placenta      | 19.40            | 0.07              | 22.23867667        | 0.080380531         | -2.84                  | 0.139975126                |
| Prostate      | 20.10            | 0.09              | 22.21217967        | 0.307579701         | -2.11                  | 0.231099547                |
| Skeletal Mus  | 19.98            | 0.11              | 21.93487933        | 0.46839436          | -1.95                  | 0.258654105                |
| Small Intesti | 19.92            | 0.09              | 22.30869767        | 0.11790371          | -2.39                  | 0.19055953                 |
| Spleen        | 19.44            | 0.11              | 21.57698333        | 0.083448603         | -2.13                  | 0.227784967                |
| Testis        | 19.86            | 0.18              | 22.467764          | 0.211583287         | -2.61                  | 0.163721949                |
| Thymus        | 19.18            | 0.11              | 21.118985          | 0.111924905         | -1.94                  | 0.25993994                 |
| Thyroid       | 19.00            | 0.22              | 20.562079          | 0.18221981          | -1.56                  | 0.3391486                  |
| Trachea       | 19.98            | 0.14              | 22.09436867        | 0.252983526         | -2.12                  | 0.230213985                |

qPCR data set 2- used to generate data presented in Figures 4 and 5

| SNORD116      | Ruler<br>Mean Cq | Ruler<br>StDev Cq | SNORD116<br>Mean Cq | SNORD116<br>StDev Cq | SNORD116<br>$\Delta Cq$ | SNORD116<br>$2^{\Delta Cq}$ |
|---------------|------------------|-------------------|---------------------|----------------------|-------------------------|-----------------------------|
| Adipose       | 16.08            | 0.04              | 18.93666667         | 0.030550505          | -2.85                   | 0.138471838                 |
| Bladder       | 15.49            | 0.03              | 16.26333333         | 0.025166115          | -0.77                   | 0.585299183                 |
| Brain         | 15.45            | 0.02              | 14.64               | 0.01                 | 0.81                    | 1.747674937                 |
| Cervex        | 16.12            | 0.01              | 16.53               | 0.01                 | -0.41                   | 0.75302824                  |
| Colon         | 15.09            | 0.03              | 17.51666667         | 0.011547005          | -2.42                   | 0.186542286                 |
| Esophagus     | 15.73            | 0.03              | 17.87               | 0.03                 | -2.14                   | 0.227656607                 |
| Heart         | 16.33            | 0.07              | 17.21333333         | 0.028867513          | -0.88                   | 0.543172321                 |
| Kidney        | 15.61            | 0.01              | 15.87666667         | 0.051316014          | -0.27                   | 0.831406653                 |
| Liver         | 16.11            | 0.02              | 18.53333333         | 0.056862407          | -2.42                   | 0.186960056                 |
| Lung          | 16.17            | 0.03              | 17.79333333         | 0.02081666           | -1.63                   | 0.323667155                 |
| Ovary         | 15.65            | 0.02              | 15.79               | 0.017320508          | -0.14                   | 0.906456815                 |
| Placenta      | 14.65            | 0.01              | 18.82               | 0                    | -4.17                   | 0.055588579                 |
| Prostate      | 15.51            | 0.04              | 16.39333333         | 0.073711148          | -0.89                   | 0.54128743                  |
| Skeletal Mus  | 16.67            | 0.03              | 17.57               | 0.02                 | -0.90                   | 0.536918068                 |
| Small Intesti | 15.73            | 0.01              | 18.25               | 0.036055513          | -2.52                   | 0.174069701                 |
| Spleen        | 16.03            | 0.03              | 17.52666667         | 0.023094011          | -1.50                   | 0.353155213                 |

|         |       |      |             |             |       |             |
|---------|-------|------|-------------|-------------|-------|-------------|
| Testis  | 15.43 | 0.04 | 15.85666667 | 0.02081666  | -0.42 | 0.745775612 |
| Thymus  | 15.54 | 0.01 | 16.95666667 | 0.025166115 | -1.42 | 0.373370045 |
| Thyroid | 15.90 | 0.03 | 13.86       | 0.026457513 | 2.04  | 4.120266061 |
| Trachea | 15.94 | 0.02 | 17.52       | 0.04        | -1.58 | 0.333804316 |

| IPW116        | Ruler<br>Mean Cq | Ruler<br>StDev Cq | IPW116<br>Mean Cq | IPW116<br>StDev Cq | IPW116<br>$\Delta Cq$ | IPW116<br>$2^{\Delta Cq}$ |
|---------------|------------------|-------------------|-------------------|--------------------|-----------------------|---------------------------|
| Adipose       | 16.08            | 0.04              | 29.26             | 0.320468407        | -13.18                | 0.000108076               |
| Bladder       | 15.49            | 0.03              | 26.95             | 0.06244998         | -11.46                | 0.000355116               |
| Brain         | 15.45            | 0.02              | 25.59333333       | 0.064291005        | -10.15                | 0.000881412               |
| Cervex        | 16.12            | 0.01              | 26.89333333       | 0.058594653        | -10.77                | 0.000571659               |
| Colon         | 15.09            | 0.03              | 27.15333333       | 0.152752523        | -12.06                | 0.000234343               |
| Esophagus     | 15.73            | 0.03              | 28.09333333       | 0.147422296        | -12.36                | 0.000190437               |
| Heart         | 16.33            | 0.07              | 26.51666667       | 0.032145503        | -10.18                | 0.000859716               |
| Kidney        | 15.61            | 0.01              | 26.57333333       | 0.035118846        | -10.96                | 0.000500952               |
| Liver         | 16.11            | 0.02              | 29.73333333       | 0.289194283        | -13.62                | 7.94718E-05               |
| Lung          | 16.17            | 0.03              | 28.53             | 0.06244998         | -12.36                | 0.000189688               |
| Ovary         | 15.65            | 0.02              | 26.64666667       | 0.080208063        | -11.00                | 0.000488838               |
| Placenta      | 14.65            | 0.01              | 30.14             | 0.337786915        | -15.49                | 2.17433E-05               |
| Prostate      | 15.51            | 0.04              | 27.23             | 0.19078784         | -11.72                | 0.000295983               |
| Skeletal Mus  | 16.67            | 0.03              | 26.81666667       | 0.134288247        | -10.14                | 0.000883861               |
| Small Intesti | 15.73            | 0.01              | 27.80666667       | 0.045092498        | -12.08                | 0.000231143               |
| Spleen        | 16.03            | 0.03              | 27.93             | 0.144222051        | -11.90                | 0.000260766               |
| Testis        | 15.43            | 0.04              | 25.67333333       | 0.030550505        | -10.24                | 0.000826984               |
| Thymus        | 15.54            | 0.01              | 27.82333333       | 0.096090235        | -12.29                | 0.000199962               |
| Thyroid       | 15.90            | 0.03              | 24.18333333       | 0.005773503        | -8.28                 | 0.003215824               |
| Trachea       | 15.94            | 0.02              | 27.6              | 0.115325626        | -11.66                | 0.000308397               |

| SNORD115      | Ruler<br>Mean Cq | Ruler<br>StDev Cq | SNORD115<br>Mean Cq | SNORD115<br>StDev Cq | SNORD115<br>$\Delta Cq$ | SNORD115<br>$2^{\Delta Cq}$ |
|---------------|------------------|-------------------|---------------------|----------------------|-------------------------|-----------------------------|
| Adipose       | 16.08            | 0.04              | 26.183333           | 0.0404145            | -10.10                  | 0.000911795                 |
| Bladder       | 15.49            | 0.03              | 21.99               | 0.07                 | -6.50                   | 0.011052982                 |
| Brain         | 15.45            | 0.02              | 14.646667           | 0.0057735            | 0.80                    | 1.739617595                 |
| Cervex        | 16.12            | 0.01              | 23.846667           | 0.0251661            | -7.73                   | 0.004723622                 |
| Colon         | 15.09            | 0.03              | 22.696667           | 0.011547             | -7.60                   | 0.00514567                  |
| Esophagus     | 15.73            | 0.03              | 22.416667           | 0.085049             | -6.68                   | 0.009740858                 |
| Heart         | 16.33            | 0.07              | 22.476667           | 0.0152753            | -6.14                   | 0.014142182                 |
| Kidney        | 15.61            | 0.01              | 19.943333           | 0.0321455            | -4.33                   | 0.049616354                 |
| Liver         | 16.11            | 0.02              | 20.686667           | 0.0550757            | -4.57                   | 0.042027243                 |
| Lung          | 16.17            | 0.03              | 24.213333           | 0.0208167            | -8.05                   | 0.00377995                  |
| Ovary         | 15.65            | 0.02              | 22.13               | 0.0608276            | -6.48                   | 0.011189661                 |
| Placenta      | 14.65            | 0.01              | 25.223333           | 0.0416333            | -10.57                  | 0.000656735                 |
| Prostate      | 15.51            | 0.04              | 21.733333           | 0.0472582            | -6.23                   | 0.013363732                 |
| Skeletal Mus  | 16.67            | 0.03              | 20.916667           | 0.011547             | -4.24                   | 0.052778977                 |
| Small Intesti | 15.73            | 0.01              | 23.47               | 0.043589             | -7.74                   | 0.00467032                  |

|         |       |      |           |           |       |             |
|---------|-------|------|-----------|-----------|-------|-------------|
| Spleen  | 16.03 | 0.03 | 25.19     | 0.0458258 | -9.16 | 0.001742097 |
| Testis  | 15.43 | 0.04 | 21.046667 | 0.0351188 | -5.61 | 0.020429724 |
| Thymus  | 15.54 | 0.01 | 22.74     | 0.0458258 | -7.20 | 0.006779266 |
| Thyroid | 15.90 | 0.03 | 19.47     | 0.0264575 | -3.57 | 0.084362023 |
| Trachea | 15.94 | 0.02 | 23.796667 | 0.0305505 | -7.86 | 0.004305534 |

| IPW115_1      | Ruler<br>Mean Cq | Ruler<br>StDev Cq | IPW115_1<br>Mean Cq | IPW115_1<br>StDev Cq | IPW115_1<br>DCq | IPW115_1<br>2 <sup>ΔCq</sup> |
|---------------|------------------|-------------------|---------------------|----------------------|-----------------|------------------------------|
| Adipose       | 16.08            | 0.04              | 31.40333333         | 0.133166562          | -15.32          | 2.44636E-05                  |
| Bladder       | 15.49            | 0.03              | 30.81               | 0.675055553          | -15.32          | 2.44565E-05                  |
| Brain         | 15.45            | 0.02              | 24.85666667         | 0.011547005          | -9.41           | 0.001468715                  |
| Cervex        | 16.12            | 0.01              | 30.81               | 0.562938718          | -14.69          | 3.78532E-05                  |
| Colon         | 15.09            | 0.03              | 29.93333333         | 0.315013227          | -14.84          | 3.41184E-05                  |
| Esophagus     | 15.73            | 0.03              | 30.79666667         | 0.155670592          | -15.06          | 2.92392E-05                  |
| Heart         | 16.33            | 0.07              | 29.90666667         | 0.190875177          | -13.57          | 8.20094E-05                  |
| Kidney        | 15.61            | 0.01              | 30.14               | 0.238117618          | -14.53          | 4.22788E-05                  |
| Liver         | 16.11            | 0.02              | 31.84333333         | 0.22898326           | -15.73          | 1.84094E-05                  |
| Lung          | 16.17            | 0.03              | 31.25666667         | 0.065064071          | -15.09          | 2.8657E-05                   |
| Ovary         | 15.65            | 0.02              | 30.55333333         | 0.34122329           | -14.91          | 3.25942E-05                  |
| Placenta      | 14.65            | 0.01              | 31.55333333         | 0.092915732          | -16.90          | 8.16339E-06                  |
| Prostate      | 15.51            | 0.04              | 30.29666667         | 0.162583312          | -14.79          | 3.53271E-05                  |
| Skeletal Mus  | 16.67            | 0.03              | 30.78666667         | 0.220302822          | -14.11          | 5.64021E-05                  |
| Small Intesti | 15.73            | 0.01              | 30.15               | 0.384317577          | -14.42          | 4.55477E-05                  |
| Spleen        | 16.03            | 0.03              | 30.93666667         | 0.098657657          | -14.91          | 3.24454E-05                  |
| Testis        | 15.43            | 0.04              | 29.58333333         | 0.205264058          | -14.15          | 5.50136E-05                  |
| Thymus        | 15.54            | 0.01              | 31.07               | 0.28                 | -15.53          | 2.1067E-05                   |
| Thyroid       | 15.90            | 0.03              | 28.7                | 0.045825757          | -12.80          | 0.000140488                  |
| Trachea       | 15.94            | 0.02              | 30.92               | 0.276224546          | -14.98          | 3.08809E-05                  |

| IPW115_2     | Ruler<br>Mean Cq | Ruler<br>StDev Cq | IPW115_2<br>Mean Cq | IPW115_2<br>StDev Cq | IPW115_2<br>ΔCq | IPW115_2<br>2 <sup>ΔCq</sup> |
|--------------|------------------|-------------------|---------------------|----------------------|-----------------|------------------------------|
| Adipose      | 16.08            | 0.04              | 35.62333333         | 0.691688755          | -19.54          | 1.31273E-06                  |
| Bladder      | 15.49            | 0.03              | 32.38               | 0.147309199          | -16.89          | 8.23717E-06                  |
| Brain        | 15.45            | 0.02              | 26.67333333         | 0.066583281          | -11.23          | 0.000416933                  |
| Cervex       | 16.12            | 0.01              | 34.04333333         | 0.447362642          | -17.92          | 4.02506E-06                  |
| Colon        | 15.09            | 0.03              | 33.1                | 0.355105618          | -18.01          | 3.7995E-06                   |
| Esophagus    | 15.73            | 0.03              | 33.50666667         | 0.550121199          | -17.77          | 4.46863E-06                  |
| Heart        | 16.33            | 0.07              | 31.37               | 0.196977156          | -15.04          | 2.97411E-05                  |
| Kidney       | 15.61            | 0.01              | 32.04333333         | 0.185022521          | -16.43          | 1.13022E-05                  |
| Liver        | 16.11            | 0.02              | 33.94666667         | 0.309246396          | -17.83          | 4.28423E-06                  |
| Lung         | 16.17            | 0.03              | 35.34               | 0.466690476          | -19.17          | 1.69054E-06                  |
| Ovary        | 15.65            | 0.02              | 33.98               | 0.708731261          | -18.33          | 3.03118E-06                  |
| Placenta     | 14.65            | 0.01              | 36.63666667         | 0.794124256          | -21.99          | 2.40788E-07                  |
| Prostate     | 15.51            | 0.04              | 32.62666667         | 0.295352896          | -17.12          | 7.02599E-06                  |
| Skeletal Mus | 16.67            | 0.03              | 32.41666667         | 0.315647483          | -15.74          | 1.82228E-05                  |

|               |       |      |             |             |        |             |
|---------------|-------|------|-------------|-------------|--------|-------------|
| Small Intesti | 15.73 | 0.01 | 33.60666667 | 0.849490043 | -17.88 | 4.14864E-06 |
| Spleen        | 16.03 | 0.03 | 35.79333333 | 0.264070698 | -19.77 | 1.11983E-06 |
| Testis        | 15.43 | 0.04 | 31.07666667 | 0.06350853  | -15.64 | 1.95403E-05 |
| Thymus        | 15.54 | 0.01 | 35.12       | 0.513906606 | -19.58 | 1.27184E-06 |
| Thyroid       | 15.90 | 0.03 | 30.80666667 | 0.141891978 | -14.90 | 3.2619E-05  |
| Trachea       | 15.94 | 0.02 | 34.83       | 0.976882797 | -18.89 | 2.05429E-06 |

| IPWAS_1       | Ruler<br>Mean Cq | Ruler<br>StDev Cq | IPWAS_1<br>Mean Cq | IPWAS_1<br>StDev Cq | IPWAS_1<br>$\Delta Cq$ | IPWAS_1<br>$2^{\Delta Cq}$ |
|---------------|------------------|-------------------|--------------------|---------------------|------------------------|----------------------------|
| Adipose       | 16.08            | 0.04              | 30.585             | 0.190918831         | -14.50                 | 4.31384E-05                |
| Bladder       | 15.49            | 0.03              | 30.01              | 0.430929229         | -14.52                 | 4.25813E-05                |
| Brain         | 15.45            | 0.02              | 28.98              | 0.09539392          | -13.53                 | 8.42734E-05                |
| Cervex        | 16.12            | 0.01              | 29.59              | 0.442379927         | -13.47                 | 8.81779E-05                |
| Colon         | 15.09            | 0.03              | 31.74666667        | 0.861935806         | -16.65                 | 9.70779E-06                |
| Esophagus     | 15.73            | 0.03              | 33.89              | 0.777817459         | -18.16                 | 3.42594E-06                |
| Heart         | 16.33            | 0.07              | 33.09333333        | 0.611582646         | -16.76                 | 9.00702E-06                |
| Kidney        | 15.61            | 0.01              | 34.33333333        | 1.50838766          | -18.72                 | 2.31102E-06                |
| Liver         | 16.11            | 0.02              | 31.66333333        | 0.6755985           | -15.55                 | 2.08557E-05                |
| Lung          | 16.17            | 0.03              | 31.36333333        | 0.440605644         | -15.20                 | 2.66147E-05                |
| Ovary         | 15.65            | 0.02              | 31.60333333        | 1.122512064         | -15.96                 | 1.5742E-05                 |
| Placenta      | 14.65            | 0.01              | 31.47              | 0.39661064          | -16.82                 | 8.64881E-06                |
| Prostate      | 15.51            | 0.04              | 32.54666667        | 1.188668723         | -17.04                 | 7.4266E-06                 |
| Skeletal Mus  | 16.67            | 0.03              | 34.68333333        | 1.279863274         | -18.01                 | 3.78688E-06                |
| Small Intesti | 15.73            | 0.01              | 33.05333333        | 0.848528137         | -17.33                 | 6.08802E-06                |
| Spleen        | 16.03            | 0.03              | 32.23              | 0.262106848         | -16.20                 | 1.3238E-05                 |
| Testis        | 15.43            | 0.04              | 33.16666667        | 1.002014637         | -17.73                 | 4.58964E-06                |
| Thymus        | 15.54            | 0.01              | 32.11333333        | 0.723417814         | -16.58                 | 1.02218E-05                |
| Thyroid       | 15.90            | 0.03              | 30.92666667        | 0.488091521         | -15.02                 | 3.00156E-05                |
| Trachea       | 15.94            | 0.02              | 30.03333333        | 0.645083974         | -14.10                 | 5.70957E-05                |

| IPWAS_2   | Ruler<br>Mean Cq | Ruler<br>StDev Cq | IPWAS_2<br>Mean Cq | IPWAS_2<br>StDev Cq | IPWAS_2<br>$\Delta Cq$ | IPWAS_2<br>$2^{\Delta Cq}$ |
|-----------|------------------|-------------------|--------------------|---------------------|------------------------|----------------------------|
| Adipose   | 16.08            | 0.04              | 31.35              | 0.212837967         | -15.27                 | 2.53849E-05                |
| Bladder   | 15.49            | 0.03              | 31.47              | 0.22                | -15.98                 | 1.5478E-05                 |
| Brain     | 15.45            | 0.02              | 29.34666667        | 0.275378527         | -13.90                 | 6.53601E-05                |
| Cervex    | 16.12            | 0.01              | 30.27              | 0.09539392          | -14.15                 | 5.50376E-05                |
| Colon     | 15.09            | 0.03              | 29.34666667        | 0.127410099         | -14.25                 | 5.1238E-05                 |
| Esophagus | 15.73            | 0.03              | 32.09333333        | 0.396274316         | -16.36                 | 1.19023E-05                |
| Heart     | 16.33            | 0.07              | 31.17333333        | 0.420990895         | -14.84                 | 3.40847E-05                |
| Kidney    | 15.61            | 0.01              | 30.74              | 0.364965752         | -15.13                 | 2.78936E-05                |
| Liver     | 16.11            | 0.02              | 31.76333333        | 0.335608899         | -15.65                 | 1.94591E-05                |
| Lung      | 16.17            | 0.03              | 31.54666667        | 0.272274371         | -15.38                 | 2.34387E-05                |
| Ovary     | 15.65            | 0.02              | 30.71666667        | 0.162583312         | -15.07                 | 2.91053E-05                |
| Placenta  | 14.65            | 0.01              | 30.40333333        | 0.193993127         | -15.75                 | 1.81157E-05                |
| Prostate  | 15.51            | 0.04              | 31.24              | 0.230651252         | -15.73                 | 1.83711E-05                |

|               |       |      |             |             |        |             |
|---------------|-------|------|-------------|-------------|--------|-------------|
| Skeletal Mus  | 16.67 | 0.03 | 32.73       | 0.469361268 | -16.06 | 1.46654E-05 |
| Small Intesti | 15.73 | 0.01 | 29.88333333 | 0.133166562 | -14.16 | 5.4795E-05  |
| Spleen        | 16.03 | 0.03 | 30.79333333 | 0.092915732 | -14.77 | 3.58345E-05 |
| Testis        | 15.43 | 0.04 | 29.44       | 0.137477271 | -14.01 | 6.07599E-05 |
| Thymus        | 15.54 | 0.01 | 30.38666667 | 0.150443788 | -14.85 | 3.38304E-05 |
| Thyroid       | 15.90 | 0.03 | 30.47333333 | 0.436501241 | -14.57 | 4.10973E-05 |
| Trachea       | 15.94 | 0.02 | 30.54666667 | 0.101159939 | -14.61 | 4.00013E-05 |

| UBE3A_1       | Ruler<br>Mean Cq | Ruler<br>StDev Cq | UBE3A_1<br>Mean Cq | UBE3A_1<br>StDev Cq | UBE3A_1<br>$\Delta Cq$ | UBE3A_1<br>$2^{\Delta Cq}$ |
|---------------|------------------|-------------------|--------------------|---------------------|------------------------|----------------------------|
| Adipose       | 16.08            | 0.04              | 26.77              | 0.026457513         | -10.69                 | 0.000607146                |
| Bladder       | 15.49            | 0.03              | 25.79333333        | 0.090737717         | -10.30                 | 0.000791703                |
| Brain         | 15.45            | 0.02              | 25.7               | 0.01                | -10.25                 | 0.000818595                |
| Cervex        | 16.12            | 0.01              | 25.06333333        | 0.04163332          | -8.94                  | 0.00203246                 |
| Colon         | 15.09            | 0.03              | 26.21              | 0.13453624          | -11.12                 | 0.000450633                |
| Esophagus     | 15.73            | 0.03              | 26.63666667        | 0.047258156         | -10.90                 | 0.000522698                |
| Heart         | 16.33            | 0.07              | 26.15              | 0.05                | -9.82                  | 0.001108493                |
| Kidney        | 15.61            | 0.01              | 26.50333333        | 0.032145503         | -10.89                 | 0.000525858                |
| Liver         | 16.11            | 0.02              | 26.76333333        | 0.061101009         | -10.65                 | 0.00062269                 |
| Lung          | 16.17            | 0.03              | 26.85333333        | 0.112398102         | -10.69                 | 0.000606411                |
| Ovary         | 15.65            | 0.02              | 26.34              | 0.121655251         | -10.69                 | 0.000604617                |
| Placenta      | 14.65            | 0.01              | 26.67333333        | 0.025166115         | -12.02                 | 0.000240379                |
| Prostate      | 15.51            | 0.04              | 26.85              | 0.03                | -11.34                 | 0.000385175                |
| Skeletal Mus  | 16.67            | 0.03              | 26.1               | 0.04                | -9.43                  | 0.00145252                 |
| Small Intesti | 15.73            | 0.01              | 26.07333333        | 0.073711148         | -10.35                 | 0.000768538                |
| Spleen        | 16.03            | 0.03              | 26.57              | 0.085440037         | -10.54                 | 0.000669347                |
| Testis        | 15.43            | 0.04              | 25.47666667        | 0.005773503         | -10.04                 | 0.000947763                |
| Thymus        | 15.54            | 0.01              | 26.21333333        | 0.180092569         | -10.68                 | 0.000610387                |
| Thyroid       | 15.90            | 0.03              | 25.59666667        | 0.04163332          | -9.69                  | 0.001207359                |
| Trachea       | 15.94            | 0.02              | 27                 | 0.060827625         | -11.06                 | 0.000467442                |

| UBE3A_2   | Ruler<br>Mean Cq | Ruler<br>StDev Cq | UBE3A_2<br>Mean Cq | UBE3A_2<br>StDev Cq | UBE3A_2<br>$\Delta Cq$ | UBE3A_2<br>$2^{\Delta Cq}$ |
|-----------|------------------|-------------------|--------------------|---------------------|------------------------|----------------------------|
| Adipose   | 16.08            | 0.04              | 24.3               | 0.14525839          | -8.22                  | 0.003363855                |
| Bladder   | 15.49            | 0.03              | 24.03666667        | 0.317227573         | -8.55                  | 0.002675293                |
| Brain     | 15.45            | 0.02              | 23.76666667        | 0.115470054         | -8.32                  | 0.003126513                |
| Cervex    | 16.12            | 0.01              | 24.19              | 0.274043792         | -8.07                  | 0.003723244                |
| Colon     | 15.09            | 0.03              | 23.94333333        | 0.142243922         | -8.85                  | 0.002168492                |
| Esophagus | 15.73            | 0.03              | 24.65666667        | 0.300887576         | -8.92                  | 0.002062006                |
| Heart     | 16.33            | 0.07              | 24.04666667        | 0.124230968         | -7.71                  | 0.004763206                |
| Kidney    | 15.61            | 0.01              | 24.51333333        | 0.250266525         | -8.90                  | 0.002088901                |
| Liver     | 16.11            | 0.02              | 24.31              | 0.098488578         | -8.20                  | 0.003410349                |
| Lung      | 16.17            | 0.03              | 24.82              | 0.23430749          | -8.65                  | 0.00248234                 |
| Ovary     | 15.65            | 0.02              | 23.89333333        | 0.127410099         | -8.25                  | 0.003296103                |
| Placenta  | 14.65            | 0.01              | 24.27              | 0.310483494         | -9.62                  | 0.001271663                |

|               |       |      |             |             |       |             |
|---------------|-------|------|-------------|-------------|-------|-------------|
| Prostate      | 15.51 | 0.04 | 24.14       | 0.125299641 | -8.63 | 0.002520281 |
| Skeletal Mus  | 16.67 | 0.03 | 24.52333333 | 0.332014056 | -7.85 | 0.004332575 |
| Small Intesti | 15.73 | 0.01 | 23.72666667 | 0.184481255 | -8.00 | 0.003909149 |
| Spleen        | 16.03 | 0.03 | 24.39666667 | 0.519839719 | -8.37 | 0.003019184 |
| Testis        | 15.43 | 0.04 | 23.22666667 | 0.21825062  | -7.79 | 0.004508345 |
| Thymus        | 15.54 | 0.01 | 24.34333333 | 0.275922694 | -8.81 | 0.002231163 |
| Thyroid       | 15.90 | 0.03 | 23.27333333 | 0.05033223  | -7.37 | 0.00604268  |
| Trachea       | 15.94 | 0.02 | 24.45666667 | 0.333216646 | -8.52 | 0.002724879 |

| 7SL RNA       | Ruler<br>Mean Cq | Ruler<br>StDev Cq | 7SL RNA<br>Mean Cq | 7SL RNA<br>StDev Cq | 7SL RNA<br>$\Delta Cq$ | 7SL RNA<br>$2^{\Delta Cq}$ |
|---------------|------------------|-------------------|--------------------|---------------------|------------------------|----------------------------|
| Adipose       | 16.08            | 0.04              | 12.41              | 0.065574385         | 3.67                   | 12.7668541                 |
| Bladder       | 15.49            | 0.03              | 12.27666667        | 0.025166115         | 3.21                   | 9.278636627                |
| Brain         | 15.45            | 0.02              | 11.95              | 0.026457513         | 3.50                   | 11.27798069                |
| Cervex        | 16.12            | 0.01              | 13.07              | 0.017320508         | 3.05                   | 8.286574671                |
| Colon         | 15.09            | 0.03              | 12.20666667        | 0.056862407         | 2.89                   | 7.400253063                |
| Esophagus     | 15.73            | 0.03              | 12.57333333        | 0.037859389         | 3.16                   | 8.948202476                |
| Heart         | 16.33            | 0.07              | 12.79              | 0.017320508         | 3.54                   | 11.65449998                |
| Kidney        | 15.61            | 0.01              | 12.76666667        | 0.032145503         | 2.84                   | 7.178220285                |
| Liver         | 16.11            | 0.02              | 12.19333333        | 0.02081666          | 3.92                   | 15.14533908                |
| Lung          | 16.17            | 0.03              | 13.38              | 0.060827625         | 2.79                   | 6.896747791                |
| Ovary         | 15.65            | 0.02              | 12.82666667        | 0.015275252         | 2.82                   | 7.069673201                |
| Placenta      | 14.65            | 0.01              | 11.50666667        | 0.015275252         | 3.14                   | 8.841343657                |
| Prostate      | 15.51            | 0.04              | 11.98666667        | 0.055075705         | 3.52                   | 11.48065825                |
| Skeletal Mus  | 16.67            | 0.03              | 13.51666667        | 0.015275252         | 3.16                   | 8.914211512                |
| Small Intesti | 15.73            | 0.01              | 12.78666667        | 0.011547005         | 2.94                   | 7.67980853                 |
| Spleen        | 16.03            | 0.03              | 13.08              | 0.036055513         | 2.95                   | 7.700974196                |
| Testis        | 15.43            | 0.04              | 12.52              | 0.02                | 2.91                   | 7.534335055                |
| Thymus        | 15.54            | 0.01              | 13.61666667        | 0.005773503         | 1.92                   | 3.780764774                |
| Thyroid       | 15.90            | 0.03              | 13.08              | 0.052915026         | 2.82                   | 7.075036057                |
| Trachea       | 15.94            | 0.02              | 12.48              | 0                   | 3.46                   | 10.98204266                |

| U6 snRNA  | Ruler<br>Mean Cq | Ruler<br>StDev Cq | U6 snRNA<br>Mean Cq | U6 snRNA<br>StDev Cq | U6 snRNA<br>$\Delta Cq$ | U6 snRNA<br>$2^{\Delta Cq}$ |
|-----------|------------------|-------------------|---------------------|----------------------|-------------------------|-----------------------------|
| Adipose   | 16.08            | 0.04              | 14.97333333         | 0.005773503          | 1.11                    | 2.159949876                 |
| Bladder   | 15.49            | 0.03              | 14.30666667         | 0.032145503          | 1.18                    | 2.271921262                 |
| Brain     | 15.45            | 0.02              | 13.61333333         | 0.015275252          | 1.83                    | 3.560558457                 |
| Cervex    | 16.12            | 0.01              | 14.57               | 0                    | 1.55                    | 2.929746571                 |
| Colon     | 15.09            | 0.03              | 13.51666667         | 0.023094011          | 1.58                    | 2.984676575                 |
| Esophagus | 15.73            | 0.03              | 14.09666667         | 0.035118846          | 1.64                    | 3.112911514                 |
| Heart     | 16.33            | 0.07              | 15.21               | 0.087177979          | 1.12                    | 2.177715067                 |
| Kidney    | 15.61            | 0.01              | 13.56               | 0                    | 2.05                    | 4.141900407                 |
| Liver     | 16.11            | 0.02              | 14.85333333         | 0.005773503          | 1.26                    | 2.396289102                 |
| Lung      | 16.17            | 0.03              | 14.59333333         | 0.015275252          | 1.57                    | 2.974367427                 |
| Ovary     | 15.65            | 0.02              | 13.76666667         | 0.025166115          | 1.88                    | 3.684946126                 |



|                      |       |      |             |             |      |             |
|----------------------|-------|------|-------------|-------------|------|-------------|
| <b>Placenta</b>      | 14.65 | 0.01 | 13.75       | 0           | 0.90 | 1.867272271 |
| <b>Prostate</b>      | 15.51 | 0.04 | 15.08666667 | 0.015275252 | 0.42 | 1.338979114 |
| <b>Skeletal Mus</b>  | 16.67 | 0.03 | 14.97333333 | 0.023094011 | 1.70 | 3.247749872 |
| <b>Small Intesti</b> | 15.73 | 0.01 | 13.93333333 | 0.011547005 | 1.79 | 3.46872069  |
| <b>Spleen</b>        | 16.03 | 0.03 | 13.96666667 | 0.011547005 | 2.06 | 4.16516687  |
| <b>Testis</b>        | 15.43 | 0.04 | 13.36666667 | 0.089628864 | 2.07 | 4.189602949 |
| <b>Thymus</b>        | 15.54 | 0.01 | 12.58666667 | 0.005773503 | 2.95 | 7.720413357 |
| <b>Thyroid</b>       | 15.90 | 0.03 | 13.7        | 0.02        | 2.20 | 4.603520275 |
| <b>Trachea</b>       | 15.94 | 0.02 | 14.32       | 0.036055513 | 1.62 | 3.067523753 |

| <b>U5 snRNA</b>      | <b>Ruler<br/>Mean Cq</b> | <b>Ruler<br/>StDev Cq</b> | <b>U5 snRNA<br/>Mean Cq</b> | <b>U5 snRNA<br/>StDev Cq</b> | <b>U5 snRNA<br/><math>\Delta Cq</math></b> | <b>U5 snRNA<br/><math>2^{\Delta Cq}</math></b> |
|----------------------|--------------------------|---------------------------|-----------------------------|------------------------------|--------------------------------------------|------------------------------------------------|
| <b>Adipose</b>       | 16.08                    | 0.04                      | 22.393333                   | 0.0550757                    | -6.31                                      | 0.012612498                                    |
| <b>Bladder</b>       | 15.49                    | 0.03                      | 21.163333                   | 0.023094                     | -5.67                                      | 0.019603379                                    |
| <b>Brain</b>         | 15.45                    | 0.02                      | 22.65                       | 0.0173205                    | -7.20                                      | 0.006779699                                    |
| <b>Cervex</b>        | 16.12                    | 0.01                      | 22                          | 0                            | -5.88                                      | 0.016989367                                    |
| <b>Colon</b>         | 15.09                    | 0.03                      | 20.843333                   | 0.0208167                    | -5.75                                      | 0.018593059                                    |
| <b>Esophagus</b>     | 15.73                    | 0.03                      | 21.98                       | 0.02                         | -6.25                                      | 0.013183993                                    |
| <b>Heart</b>         | 16.33                    | 0.07                      | 22.396667                   | 0.0929157                    | -6.06                                      | 0.014948541                                    |
| <b>Kidney</b>        | 15.61                    | 0.01                      | 21.973333                   | 0.0057735                    | -6.36                                      | 0.012148816                                    |
| <b>Liver</b>         | 16.11                    | 0.02                      | 23.103333                   | 0.0251661                    | -6.99                                      | 0.007871215                                    |
| <b>Lung</b>          | 16.17                    | 0.03                      | 21.636667                   | 0.0208167                    | -5.47                                      | 0.022549661                                    |
| <b>Ovary</b>         | 15.65                    | 0.02                      | 21.7                        | 0.03                         | -6.05                                      | 0.015075088                                    |
| <b>Placenta</b>      | 14.65                    | 0.01                      | 19.876667                   | 0.011547                     | -5.23                                      | 0.026723738                                    |
| <b>Prostate</b>      | 15.51                    | 0.04                      | 20.623333                   | 0.0351188                    | -5.12                                      | 0.028845034                                    |
| <b>Skeletal Mus</b>  | 16.67                    | 0.03                      | 22.9                        | 0.0458258                    | -6.23                                      | 0.01334806                                     |
| <b>Small Intesti</b> | 15.73                    | 0.01                      | 21.836667                   | 0.011547                     | -6.11                                      | 0.014488684                                    |
| <b>Spleen</b>        | 16.03                    | 0.03                      | 22.526667                   | 0.0472582                    | -6.50                                      | 0.0110361                                      |
| <b>Testis</b>        | 15.43                    | 0.04                      | 21.966667                   | 0.0152753                    | -6.53                                      | 0.010797293                                    |
| <b>Thymus</b>        | 15.54                    | 0.01                      | 21.876667                   | 0.023094                     | -6.34                                      | 0.01233309                                     |
| <b>Thyroid</b>       | 15.90                    | 0.03                      | 22.443333                   | 0.0057735                    | -6.54                                      | 0.010741983                                    |
| <b>Trachea</b>       | 15.94                    | 0.02                      | 22.65                       | 0.03                         | -6.71                                      | 0.009532528                                    |

Table S6. Compliance of qPCR experiments with the MIQE guidelines

| ITEM TO CHECK                                                        | IMPORTANCE | CHECKLIST                                                                                   |
|----------------------------------------------------------------------|------------|---------------------------------------------------------------------------------------------|
| <b>EXPERIMENTAL DESIGN</b>                                           |            |                                                                                             |
| Definition of experimental and control groups                        | E          | Yes (see manuscript for details)                                                            |
| Number within each group                                             | E          | Yes (see manuscript for details)                                                            |
| Assay carried out by core lab or investigator's lab?                 | D          | Yes (see manuscript for details)                                                            |
| Acknowledgement of authors' contributions                            | D          | No                                                                                          |
| <b>SAMPLE</b>                                                        |            |                                                                                             |
| Description                                                          | E          | Yes (see manuscript for details)                                                            |
| Volume/mass of sample processed                                      | D          | Not applicable                                                                              |
| Microdissection or macrodissection                                   | E          | Not applicable                                                                              |
| Processing procedure                                                 | E          | Not applicable                                                                              |
| If frozen - how and how quickly?                                     | E          | Not applicable                                                                              |
| If fixed - with what, how quickly?                                   | E          | Not applicable                                                                              |
| Sample storage conditions and duration (especially for FFPE samples) | E          | All RNA samples were stored at -80°C                                                        |
| <b>NUCLEIC ACID EXTRACTION</b>                                       |            |                                                                                             |
| Procedure and/or instrumentation                                     | E          | Not applicable (Commercial)                                                                 |
| Name of kit and details of any modifications                         | E          | Yes (see manuscript for details)                                                            |
| Source of additional reagents used                                   | D          | Not applicable                                                                              |
| Details of DNase or RNase treatment                                  | E          | Not applicable (Commercial)                                                                 |
| Contamination assessment (DNA or RNA)                                | E          | Yes (see manuscript for details)                                                            |
| Nucleic acid quantification                                          | E          | Yes (see manuscript for details)                                                            |
| Instrument and method                                                | E          | Yes (see manuscript for details)                                                            |
| Purity (A260/A280)                                                   | D          | Yes (see manuscript for details)                                                            |
| Yield                                                                | D          | Not applicable (Commercial)                                                                 |
| RNA integrity method/instrument                                      | E          | Yes (see manuscript for details)                                                            |
| RIN/RQI or Cq of 3' and 5' transcripts                               | E          | Not applicable (Commercial)                                                                 |
| Electrophoresis traces                                               | D          | No                                                                                          |
| Inhibition testing (Cq dilutions, spike or other)                    | E          | No (MIQE guidelines state that for screening studies these specifications are not required) |
| <b>REVERSE TRANSCRIPTION</b>                                         |            |                                                                                             |
| Complete reaction conditions                                         | E          | Yes (see manuscript for details)                                                            |
| Amount of RNA and reaction volume                                    | E          | Yes (see manuscript for details)                                                            |
| Priming oligonucleotide (if using GSP) and concentration             | E          | No (Manufacturer does not provide stem-loop RT primer sequences)                            |
| Reverse transcriptase and concentration                              | E          | Yes (see manuscript for details)                                                            |
| Temperature and time                                                 | E          | Yes (see manuscript for details)                                                            |
| Manufacturer of reagents and catalogue numbers                       | D          | Yes (see manuscript for details)                                                            |
| Cqs with and without RT                                              | D*         | No (see comment on DNase treatment)                                                         |
| Storage conditions of cDNA                                           | D          | cDNA was stored at -20°C                                                                    |
| <b>qPCR TARGET INFORMATION</b>                                       |            |                                                                                             |
| If multiplex, efficiency and LOD of each assay.                      | E          | No (MIQE guidelines state that for screening studies these specifications are not required) |
| Sequence accession number                                            | E          | Yes (see manuscript for details)                                                            |
| Location of amplicon                                                 | D          | No (primer sequence information given)                                                      |
| Amplicon length                                                      | E          | Yes (see manuscript for details)                                                            |
| <i>In silico</i> specificity screen (BLAST, etc)                     | E          | Yes (see manuscript for details)                                                            |
| Pseudogenes, retropseudogenes or other homologs?                     | D          | No (MIQE guidelines state that for screening studies these specifications are not required) |
| Sequence alignment                                                   | D          | No (MIQE guidelines state that for screening studies these specifications are not required) |
| Secondary structure analysis of amplicon                             | D          | No (MIQE guidelines state that for screening studies these specifications are not required) |

| ITEM TO CHECK                                                        | IMPORTANCE | CHECKLIST                                                                                   |
|----------------------------------------------------------------------|------------|---------------------------------------------------------------------------------------------|
| <b>EXPERIMENTAL DESIGN</b>                                           |            |                                                                                             |
| Definition of experimental and control groups                        | E          | Yes (see manuscript for details)                                                            |
| Number within each group                                             | E          | Yes (see manuscript for details)                                                            |
| Assay carried out by core lab or investigator's lab?                 | D          | Yes (see manuscript for details)                                                            |
| Acknowledgement of authors' contributions                            | D          | No                                                                                          |
| <b>SAMPLE</b>                                                        |            |                                                                                             |
| Description                                                          | E          | Yes (see manuscript for details)                                                            |
| Volume/mass of sample processed                                      | D          | Not applicable                                                                              |
| Microdissection or macrodissection                                   | E          | Not applicable                                                                              |
| Processing procedure                                                 | E          | Not applicable                                                                              |
| If frozen - how and how quickly?                                     | E          | Not applicable                                                                              |
| If fixed - with what, how quickly?                                   | E          | Not applicable                                                                              |
| Sample storage conditions and duration (especially for FFPE samples) | E          | All RNA samples were stored at -80°C                                                        |
| <b>NUCLEIC ACID EXTRACTION</b>                                       |            |                                                                                             |
| Procedure and/or instrumentation                                     | E          | Not applicable (Commercial)                                                                 |
| Name of kit and details of any modifications                         | E          | Yes (see manuscript for details)                                                            |
| Source of additional reagents used                                   | D          | Not applicable                                                                              |
| Details of DNase or RNase treatment                                  | E          | Not applicable (Commercial)                                                                 |
| Contamination assessment (DNA or RNA)                                | E          | Yes (see manuscript for details)                                                            |
| Nucleic acid quantification                                          | E          | Yes (see manuscript for details)                                                            |
| Instrument and method                                                | E          | Yes (see manuscript for details)                                                            |
| Purity (A260/A280)                                                   | D          | Yes (see manuscript for details)                                                            |
| Yield                                                                | D          | Not applicable (Commercial)                                                                 |
| RNA integrity method/instrument                                      | E          | Yes (see manuscript for details)                                                            |
| RIN/RQI or Cq of 3' and 5' transcripts                               | E          | Not applicable (Commercial)                                                                 |
| Electrophoresis traces                                               | D          | No                                                                                          |
| Inhibition testing (Cq dilutions, spike or other)                    | E          | No (MIQE guidelines state that for screening studies these specifications are not required) |
| <b>REVERSE TRANSCRIPTION</b>                                         |            |                                                                                             |
| Complete reaction conditions                                         | E          | Yes (see manuscript for details)                                                            |
| Amount of RNA and reaction volume                                    | E          | Yes (see manuscript for details)                                                            |
| Priming oligonucleotide (if using GSP) and concentration             | E          | No (Manufacturer does not provide stem-loop RT primer sequences)                            |
| Reverse transcriptase and concentration                              | E          | Yes (see manuscript for details)                                                            |
| Temperature and time                                                 | E          | Yes (see manuscript for details)                                                            |
| Manufacturer of reagents and catalogue numbers                       | D          | Yes (see manuscript for details)                                                            |
| Cqs with and without RT                                              | D*         | No (see comment on DNase treatment)                                                         |
| Storage conditions of cDNA                                           | D          | cDNA was stored at -20°C                                                                    |
| <b>qPCR TARGET INFORMATION</b>                                       |            |                                                                                             |
| If multiplex, efficiency and LOD of each assay.                      | E          | No (MIQE guidelines state that for screening studies these specifications are not required) |
| Sequence accession number                                            | E          | Yes (see manuscript for details)                                                            |
| Location of amplicon                                                 | D          | No (primer sequence information given)                                                      |
| Amplicon length                                                      | E          | Yes (see manuscript for details)                                                            |
| <i>In silico</i> specificity screen (BLAST, etc)                     | E          | Yes (see manuscript for details)                                                            |
| Pseudogenes, retropseudogenes or other homologs?                     | D          | No (MIQE guidelines state that for screening studies these specifications are not required) |
| Sequence alignment                                                   | D          | No (MIQE guidelines state that for screening studies these specifications are not required) |
| Secondary structure analysis of amplicon                             | D          | No (MIQE guidelines state that for screening studies these specifications are not required) |
